# Supplementary material for: Host-specific sensing of coronaviruses and picornaviruses by the CARD8 inflammasome
Source: PubMed Central journal article supplement (PMC10249858; doi:10.1371/journal.pbio.3002144), 2023-06-08

Figure 1B aFLAG

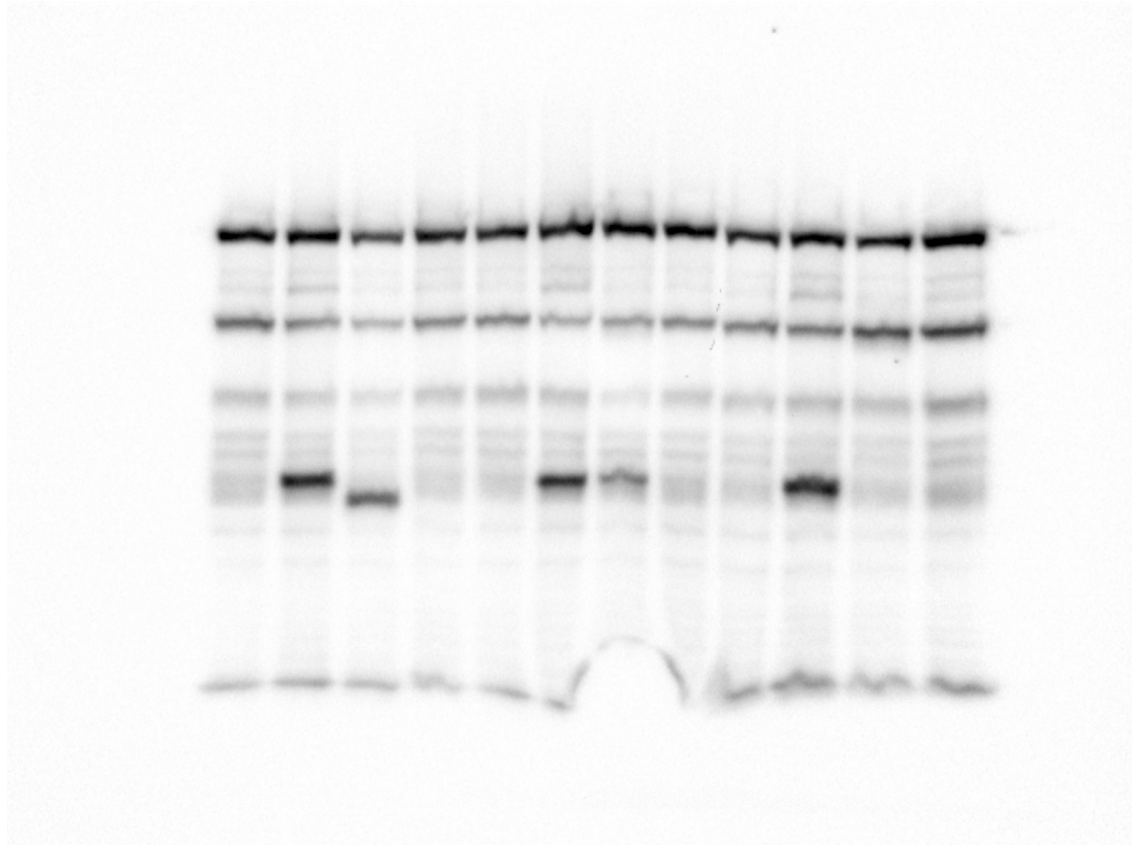

# Figure 1B aHA

low

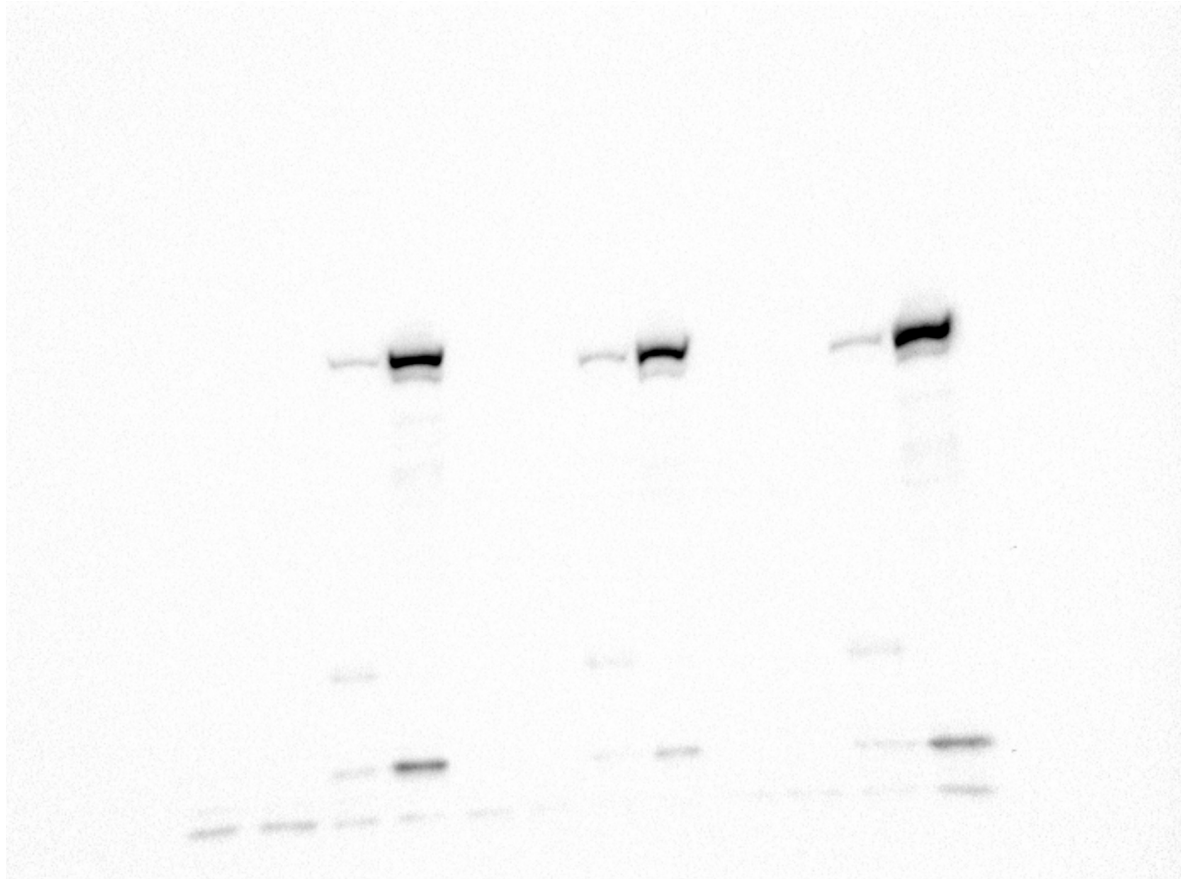

high

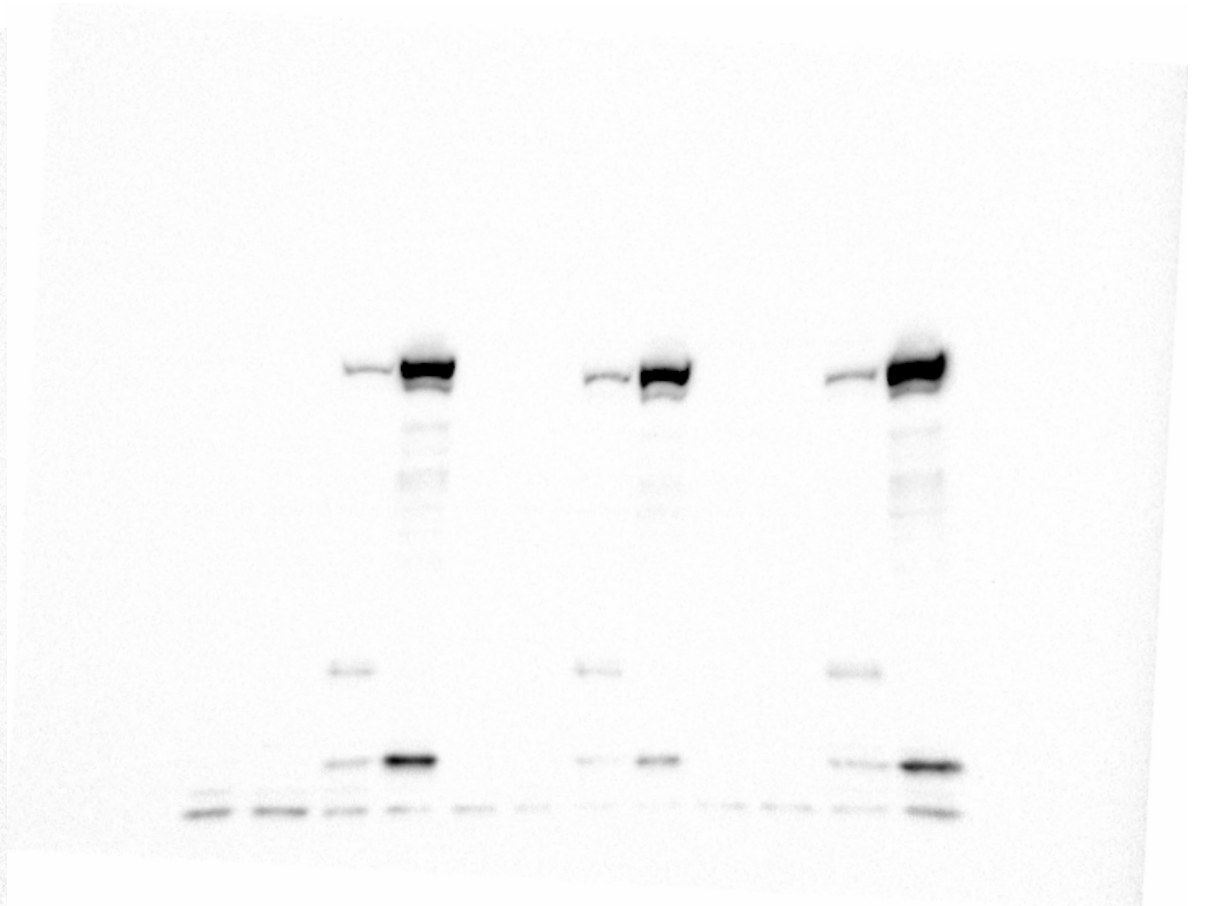

# Figure 1B aGAPDH

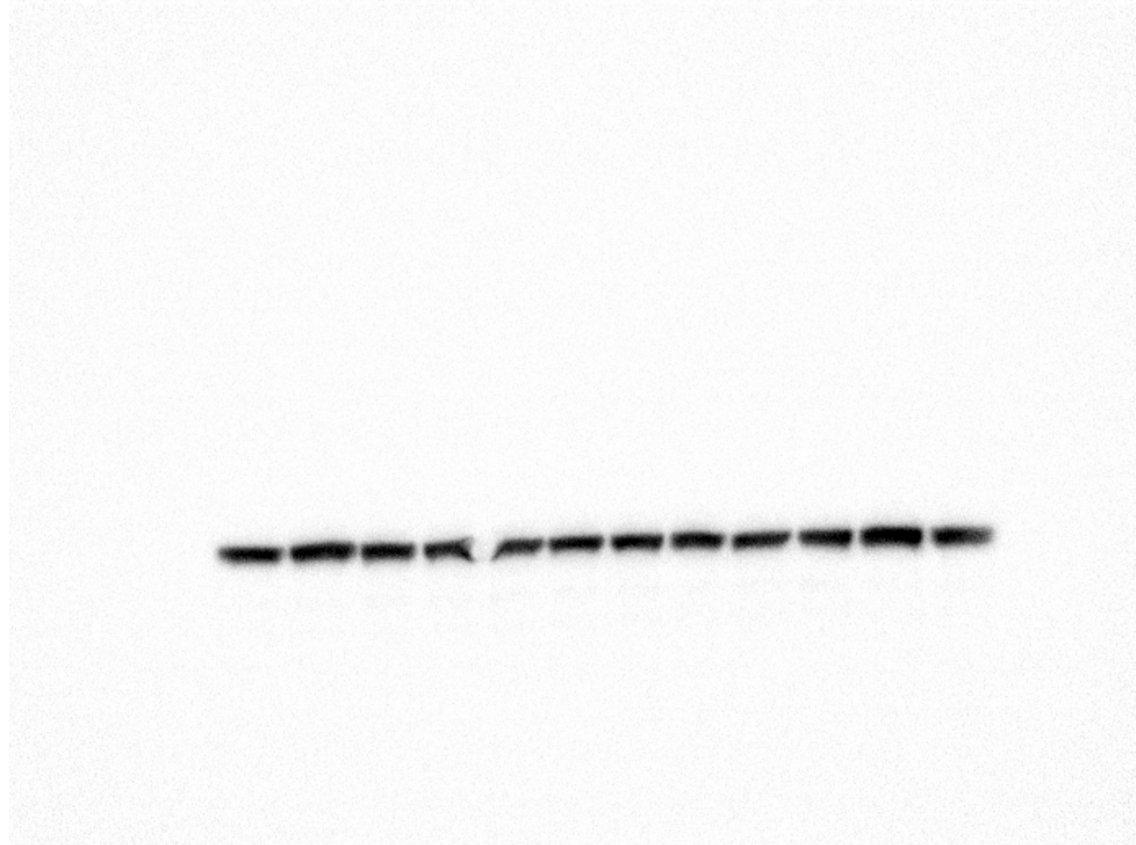

# Figure 1C aV5

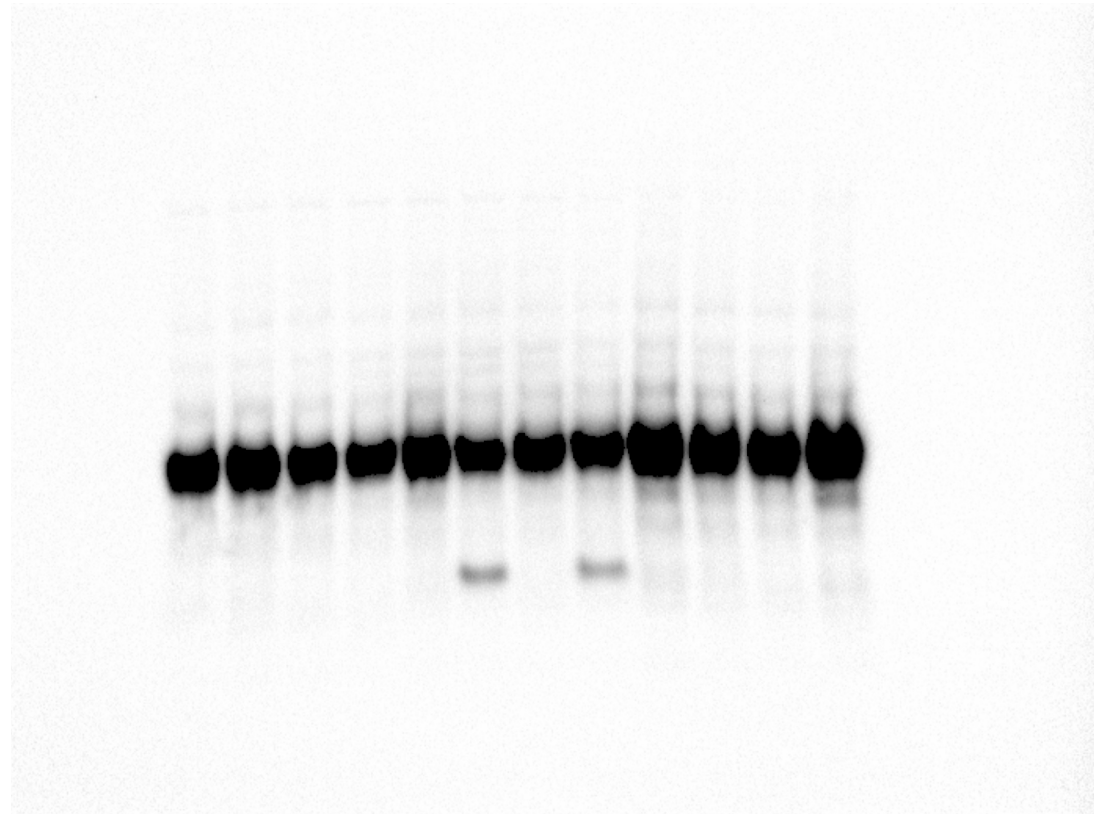

Figure 1C aHA

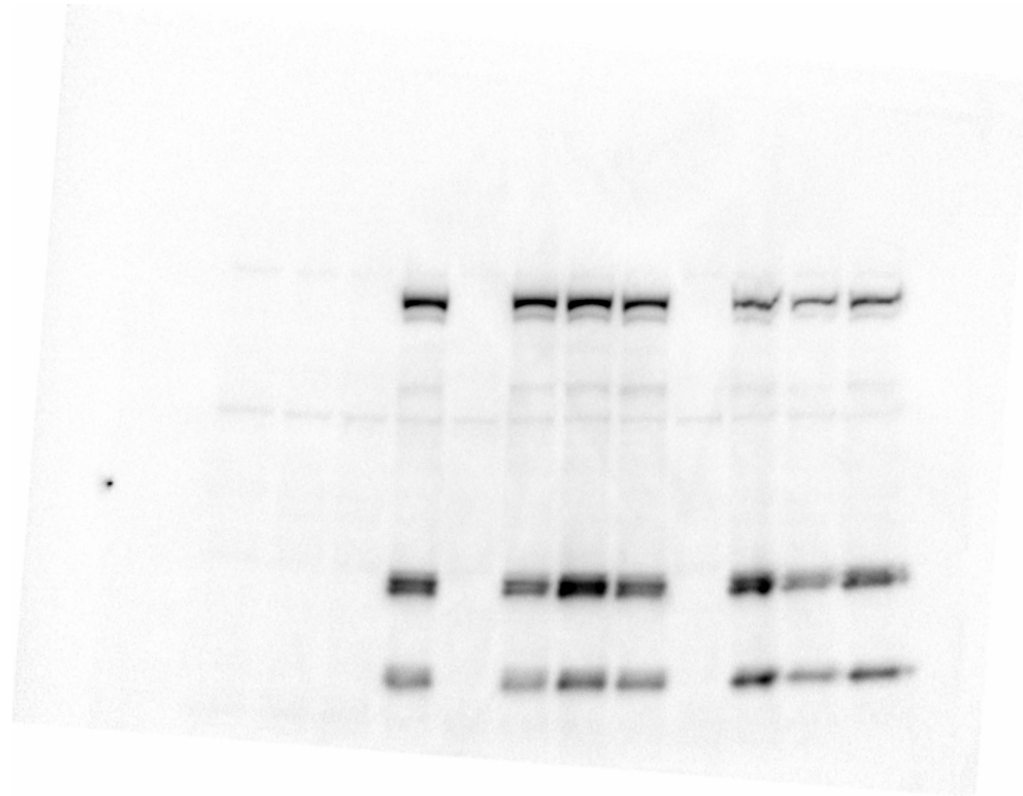

# Figure 1C aGAPDH

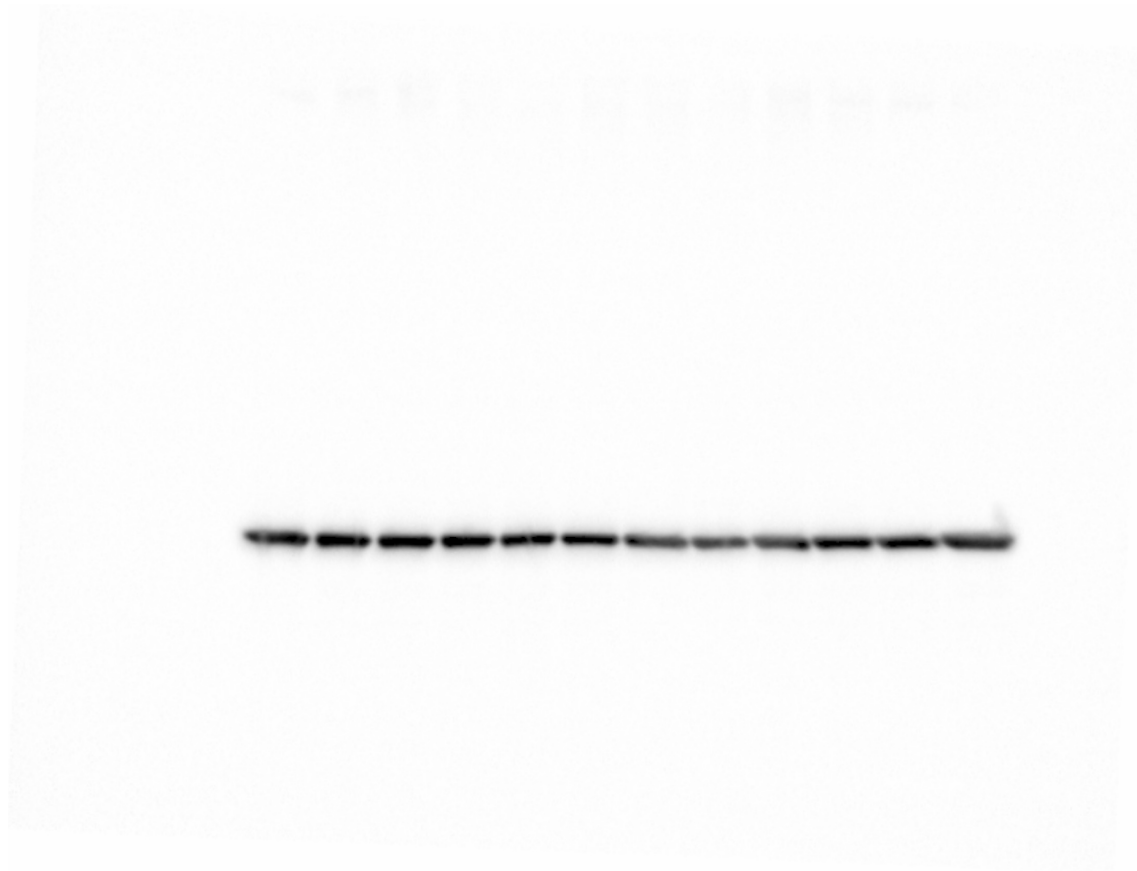

# Figure 3B aFLAG

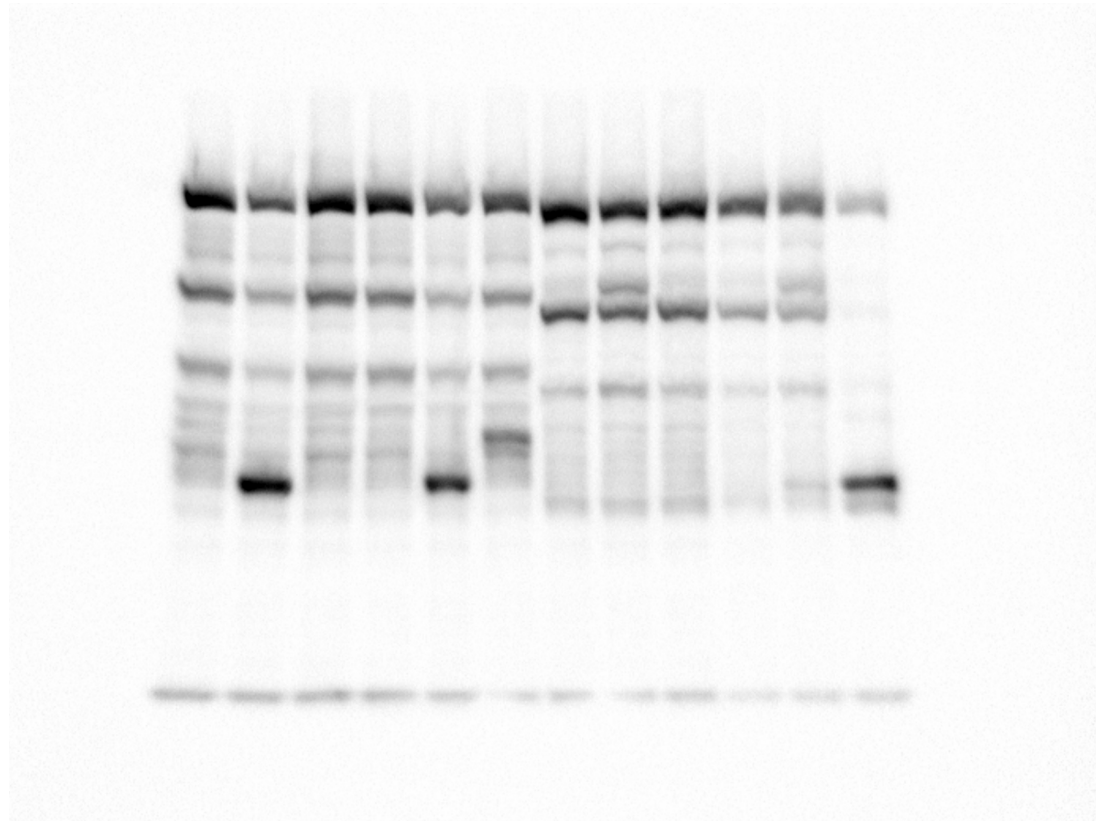

Figure 3B aHA

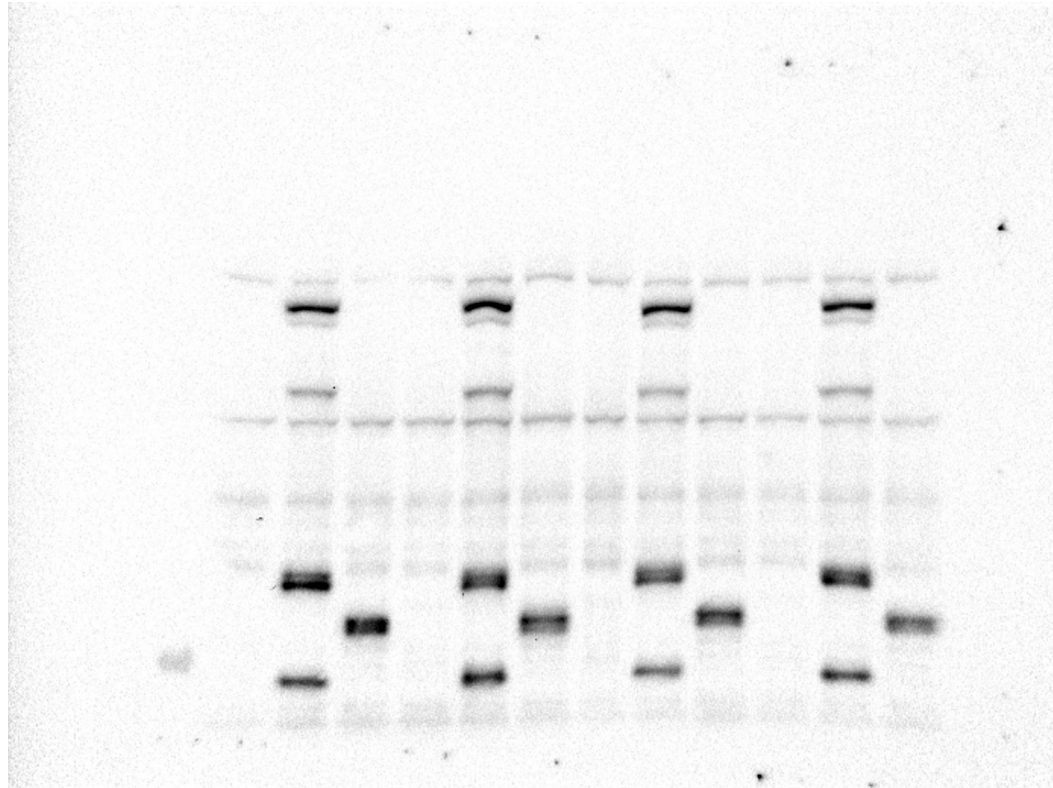



# Figure 3B aGAPDH

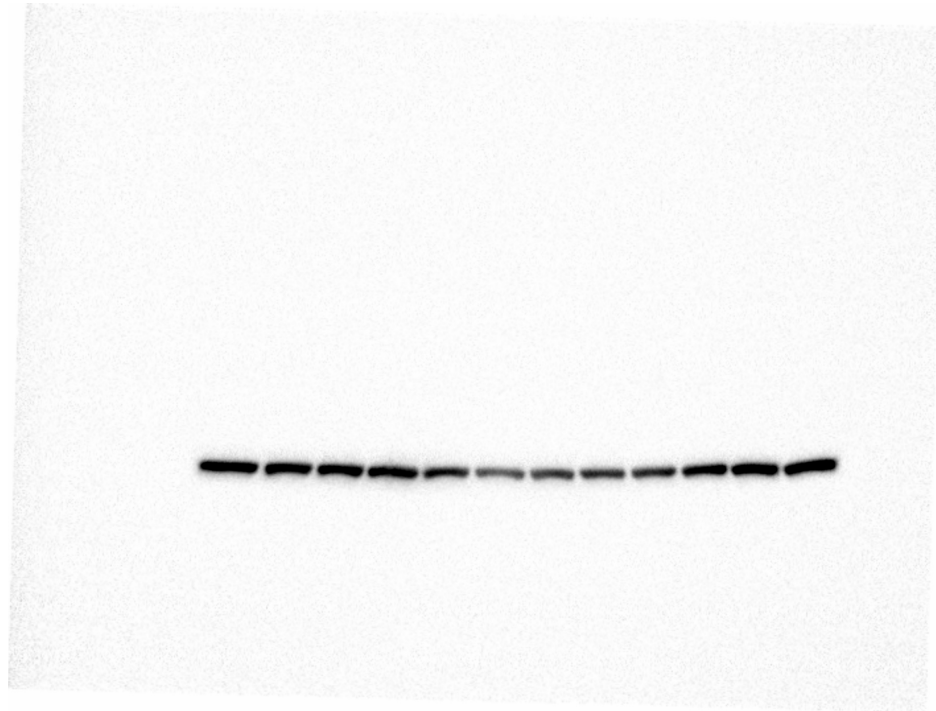

# Figure 3C aFLAG

First 9

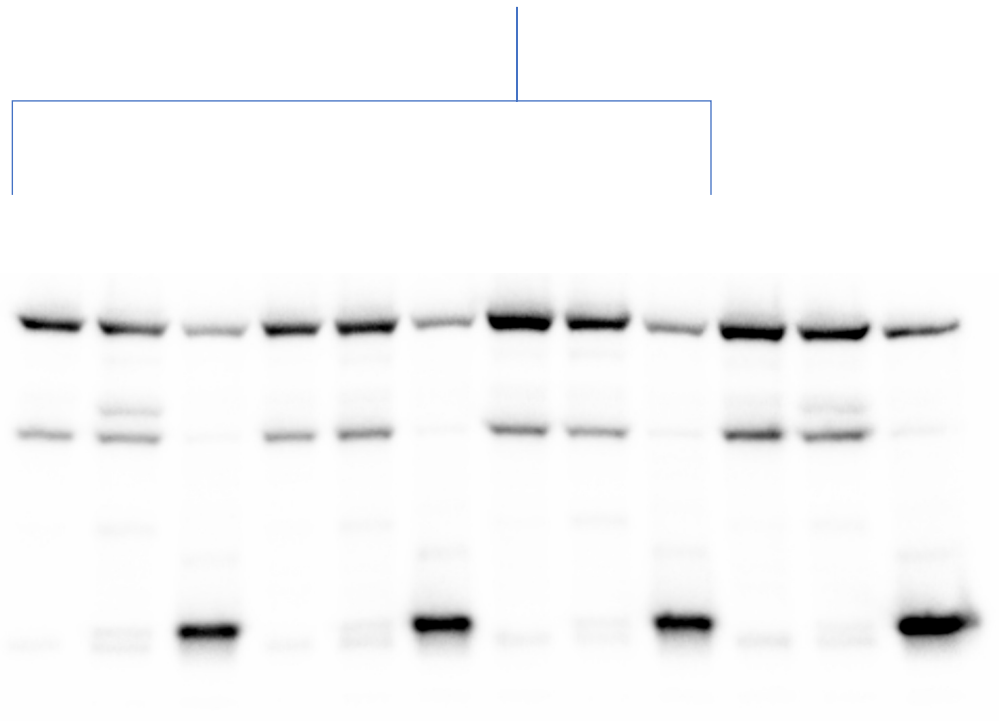

# Figure 3C aHA

First 9

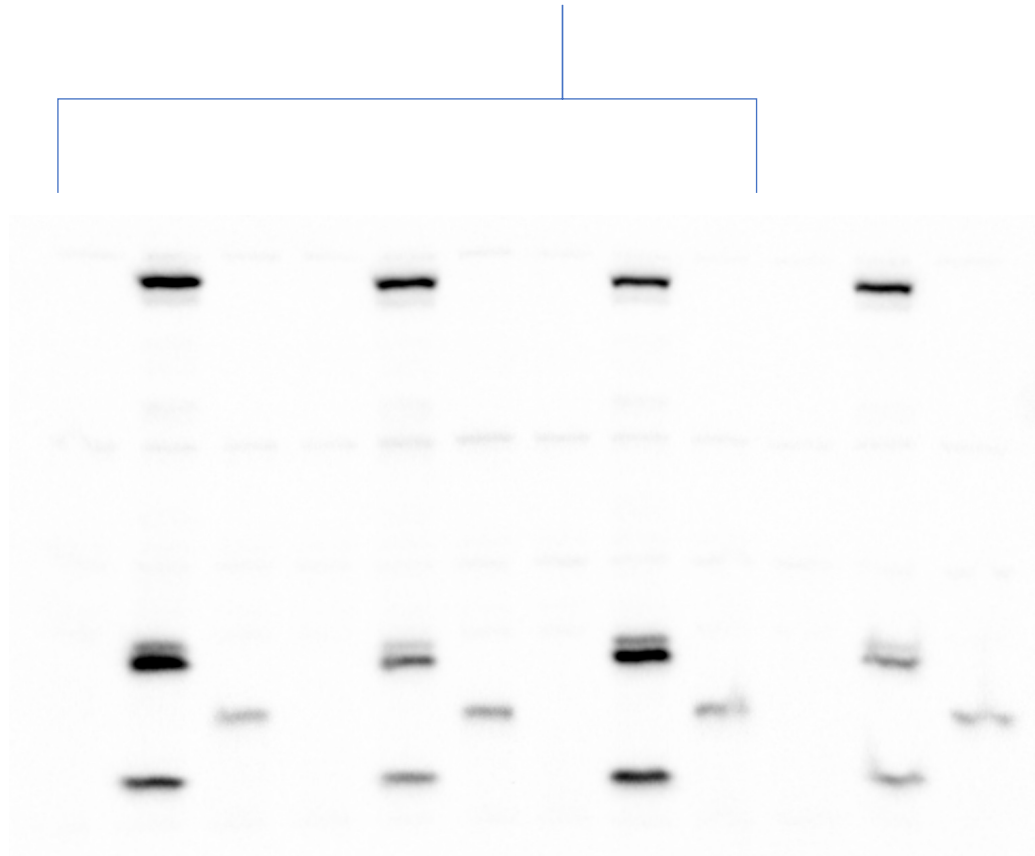

# Figure 3C aGAPDH

First 9

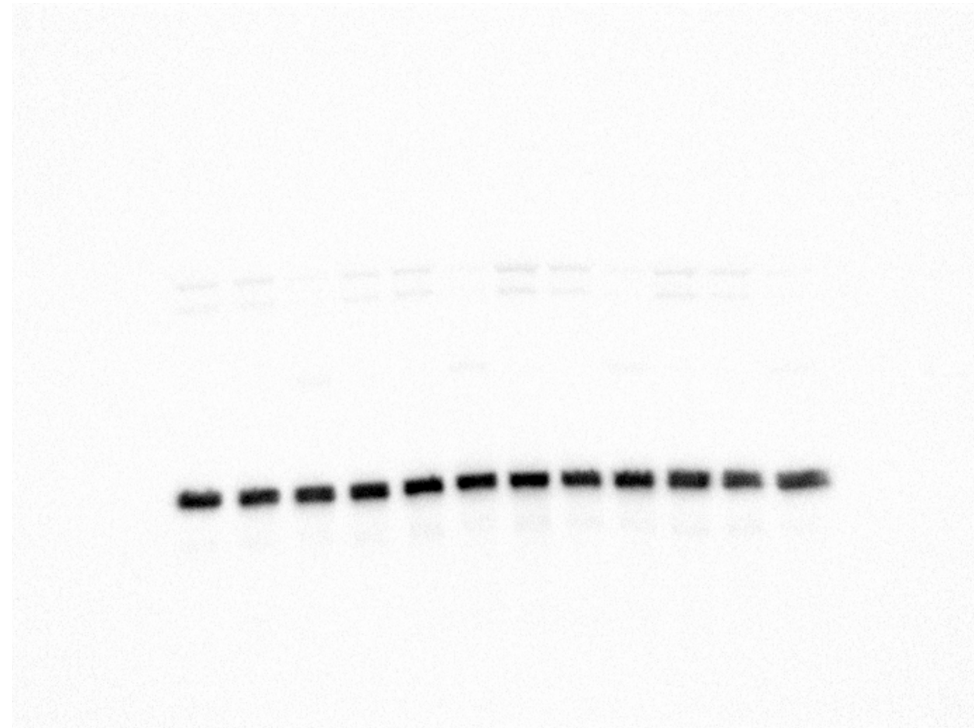

# Figure 3D aV5

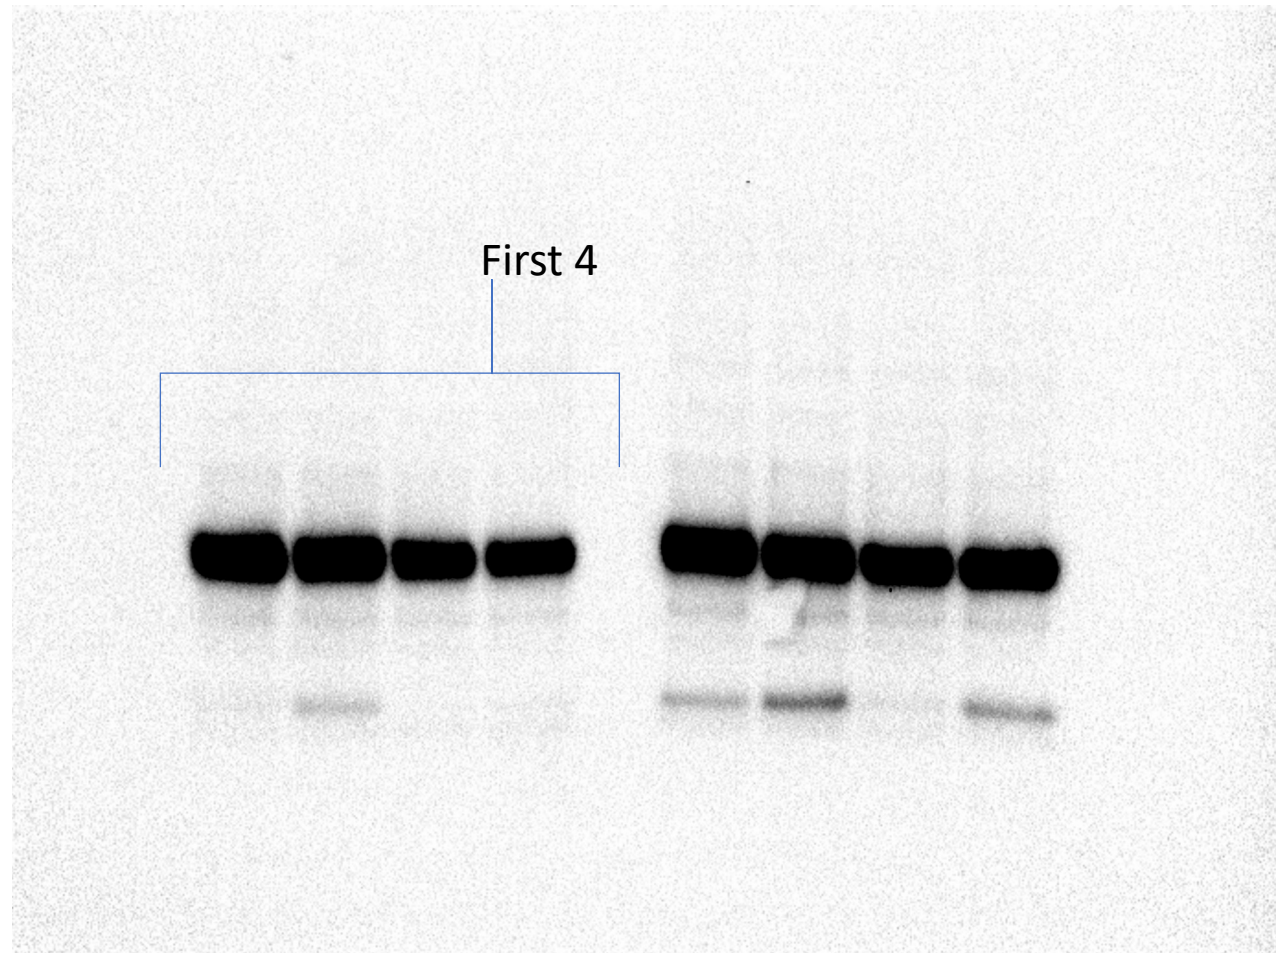

Figure 3D aMyc

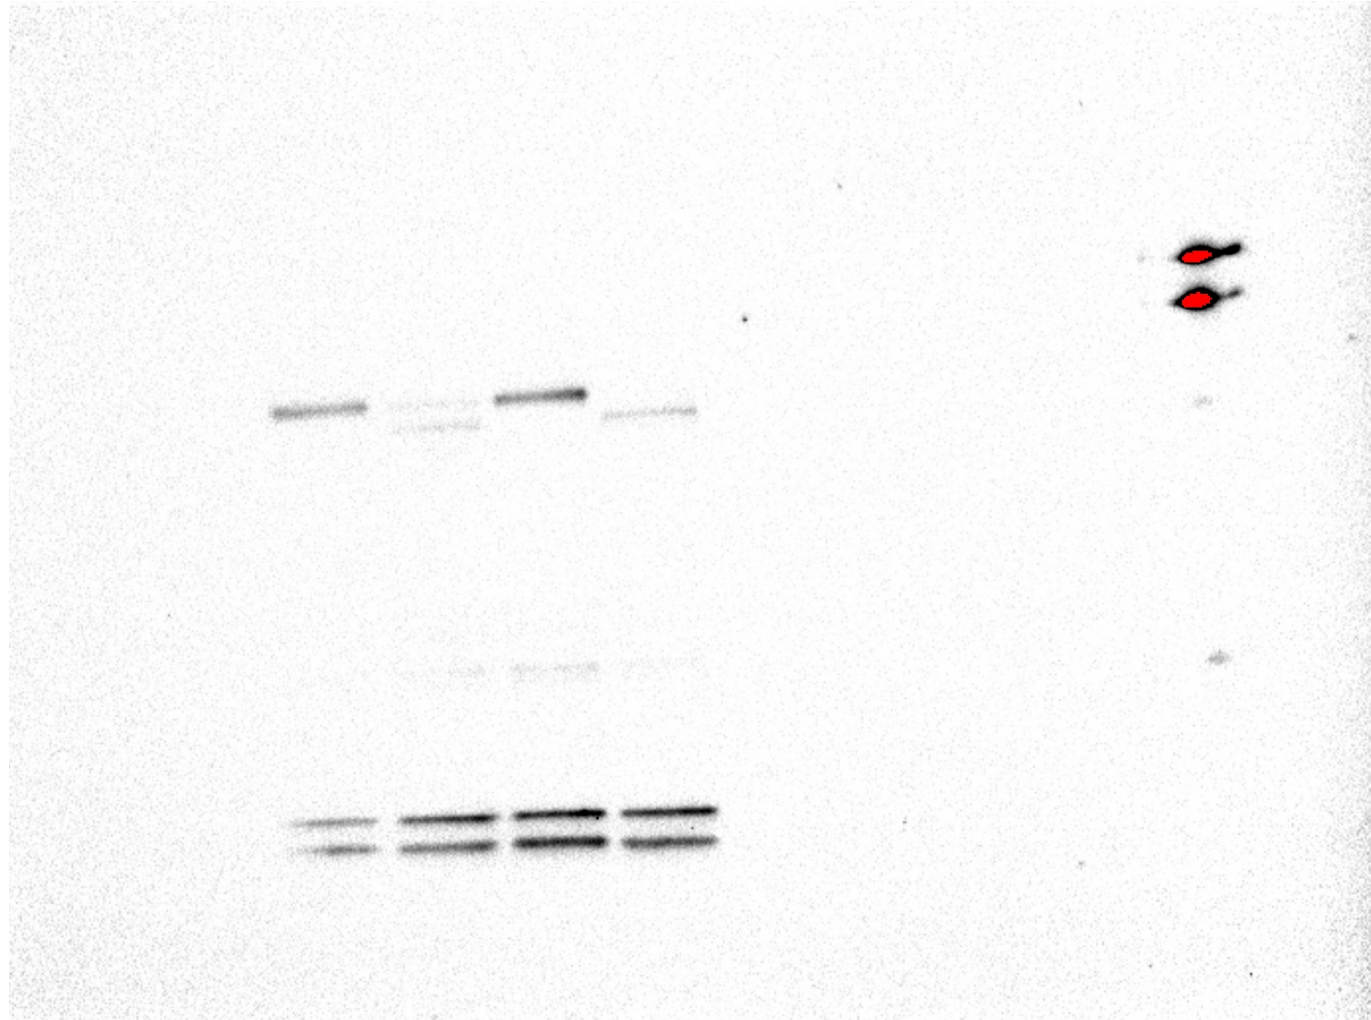

Figure 3D aHA

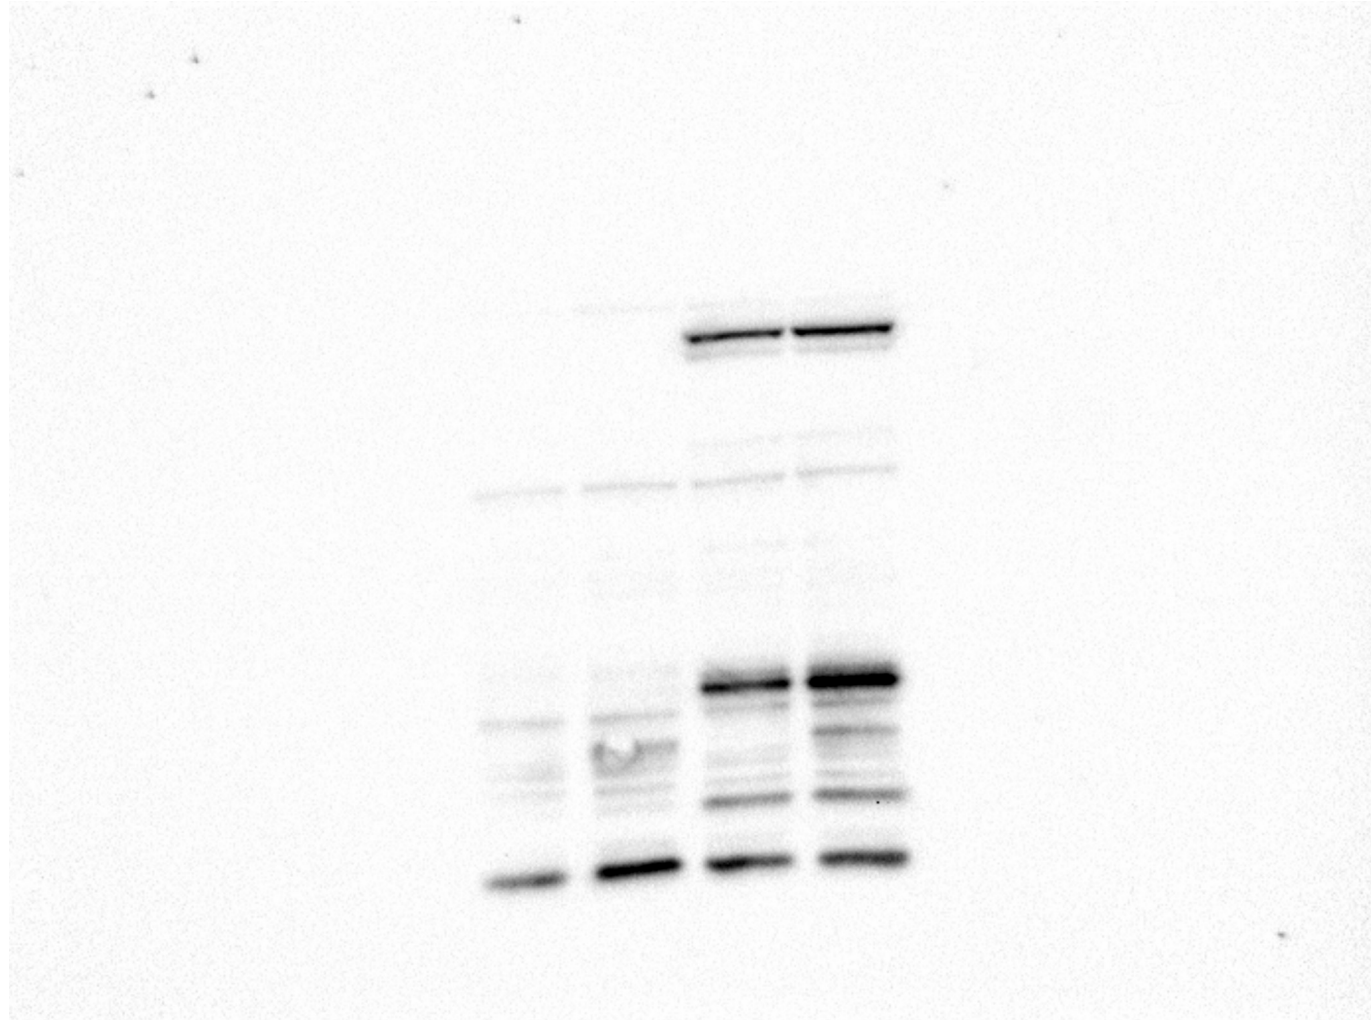

# Figure 3D aGAPDH

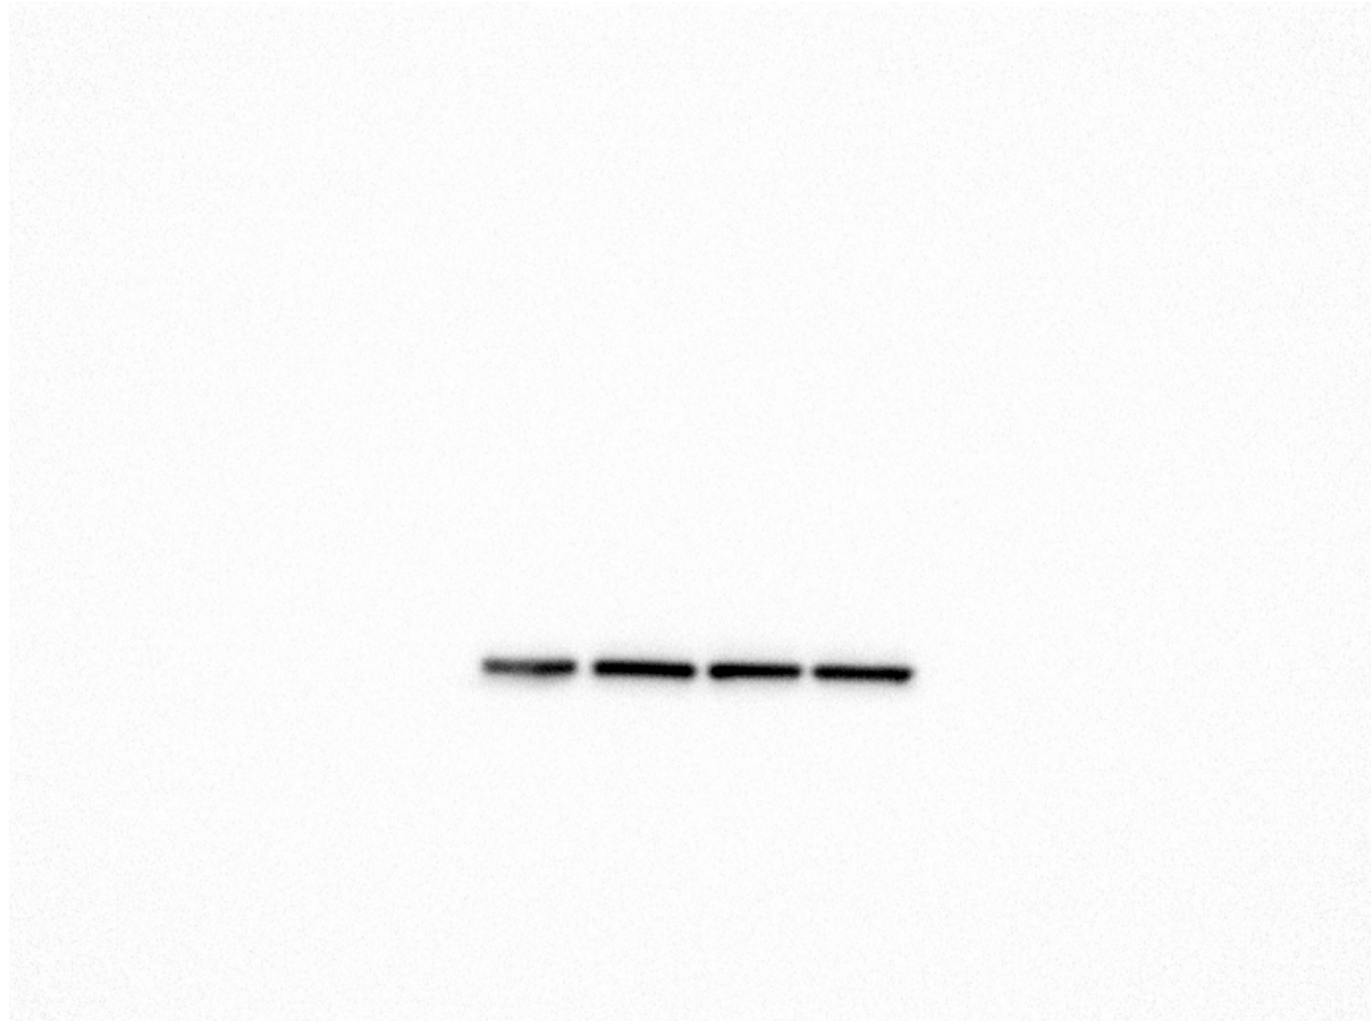



Figure 3E aV5

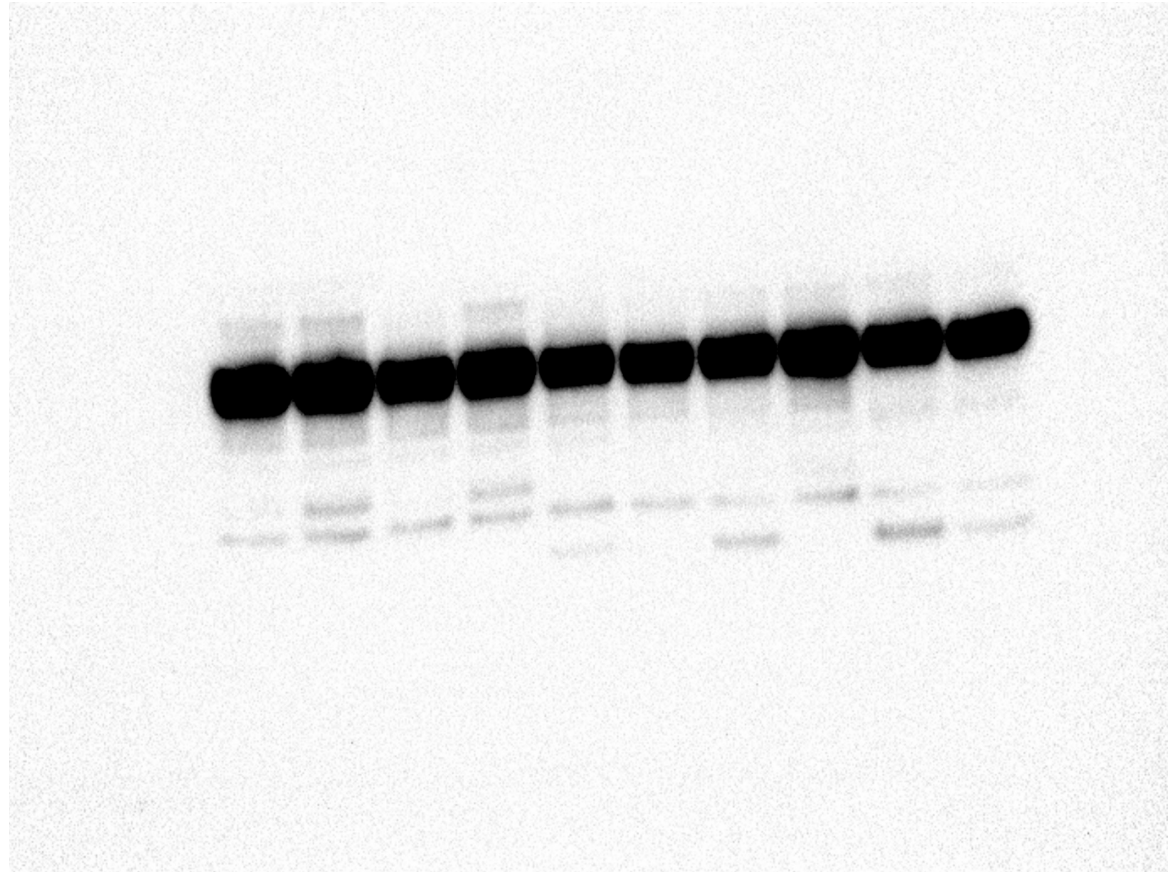

Figure 3E aMyc

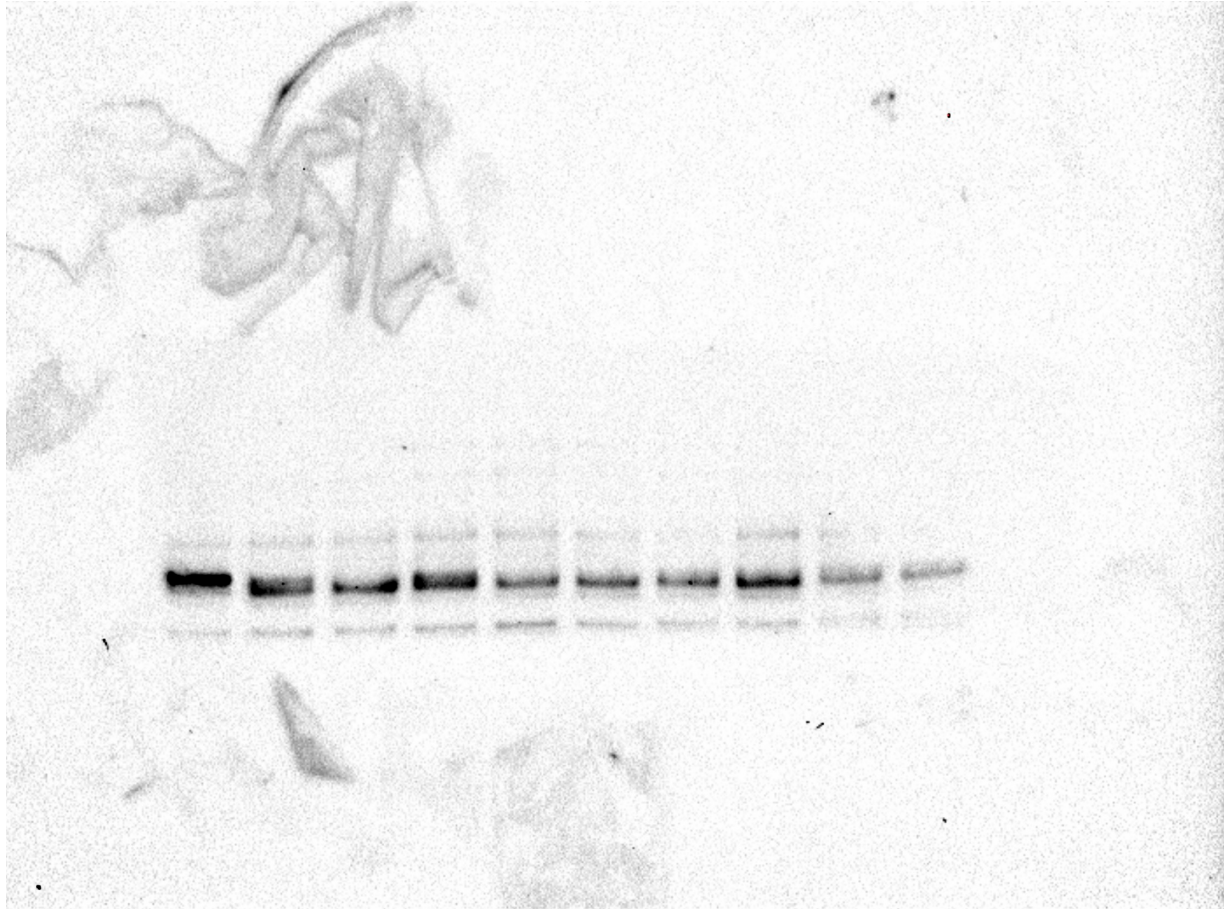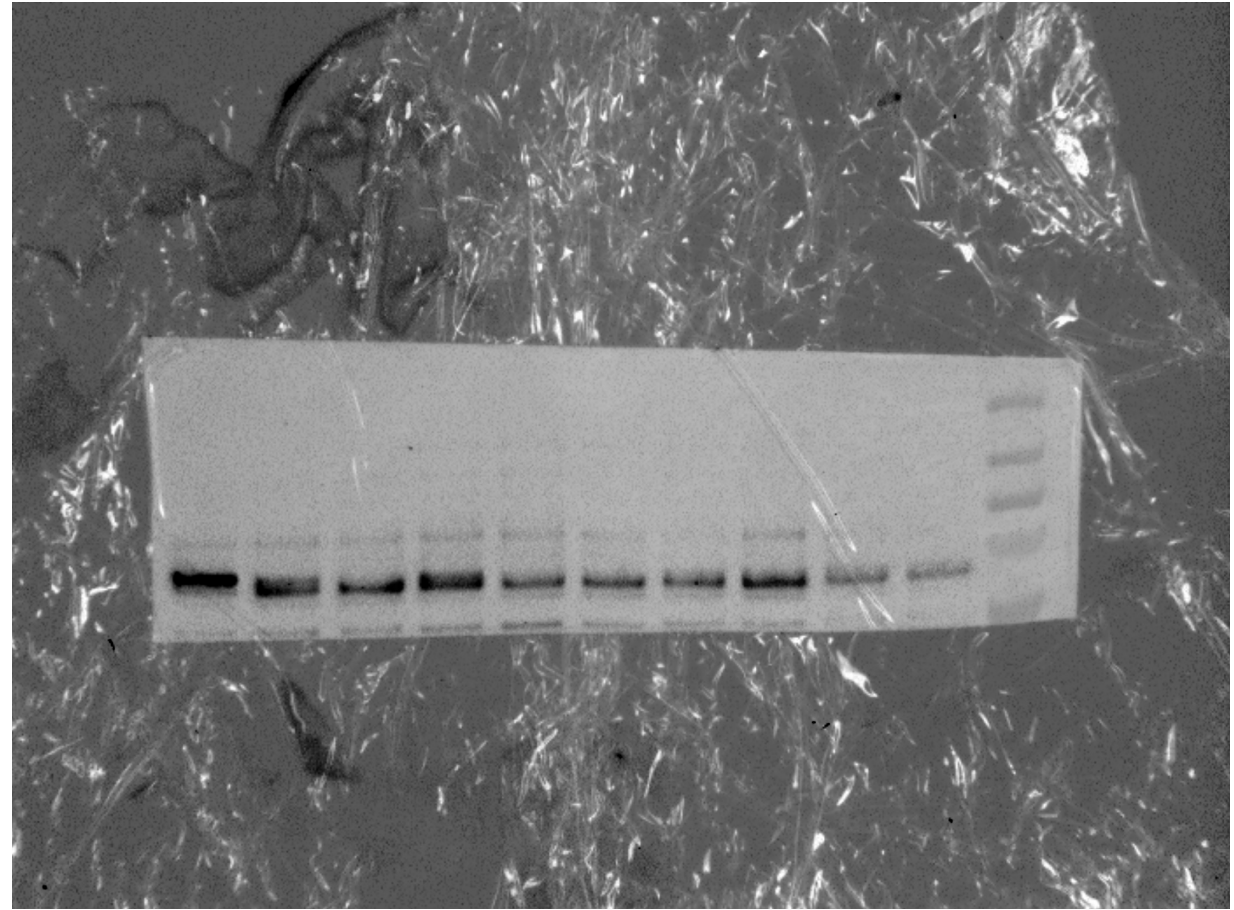

# Figure 3E aHA

low

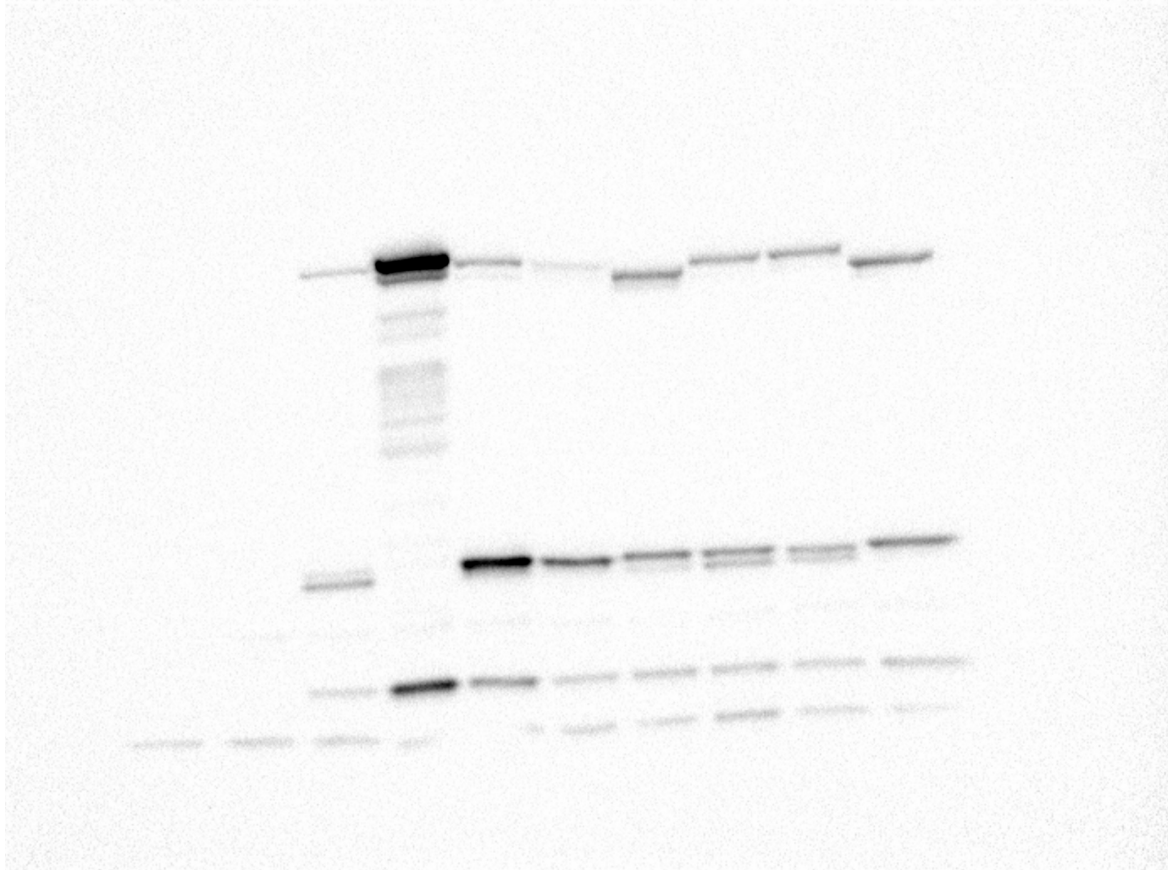

high

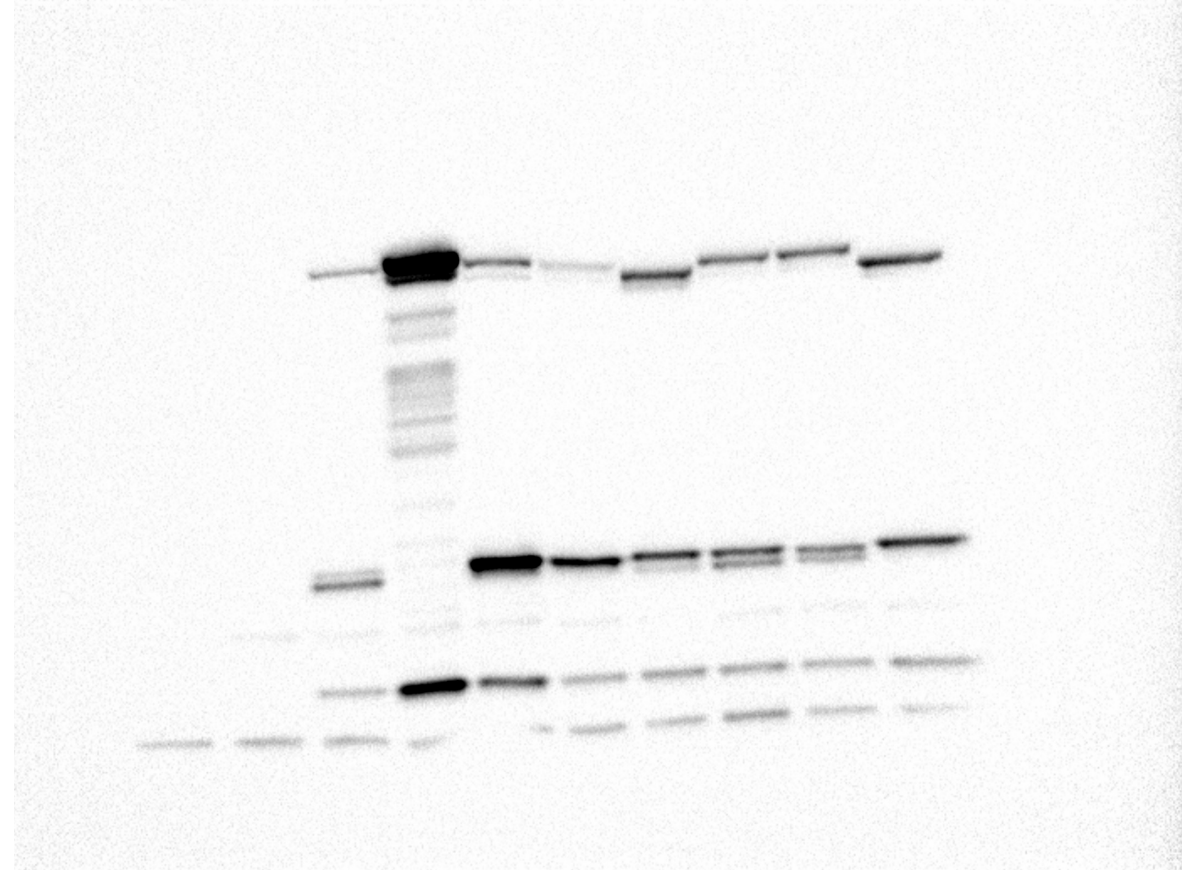

# Figure 3E aGAPDH

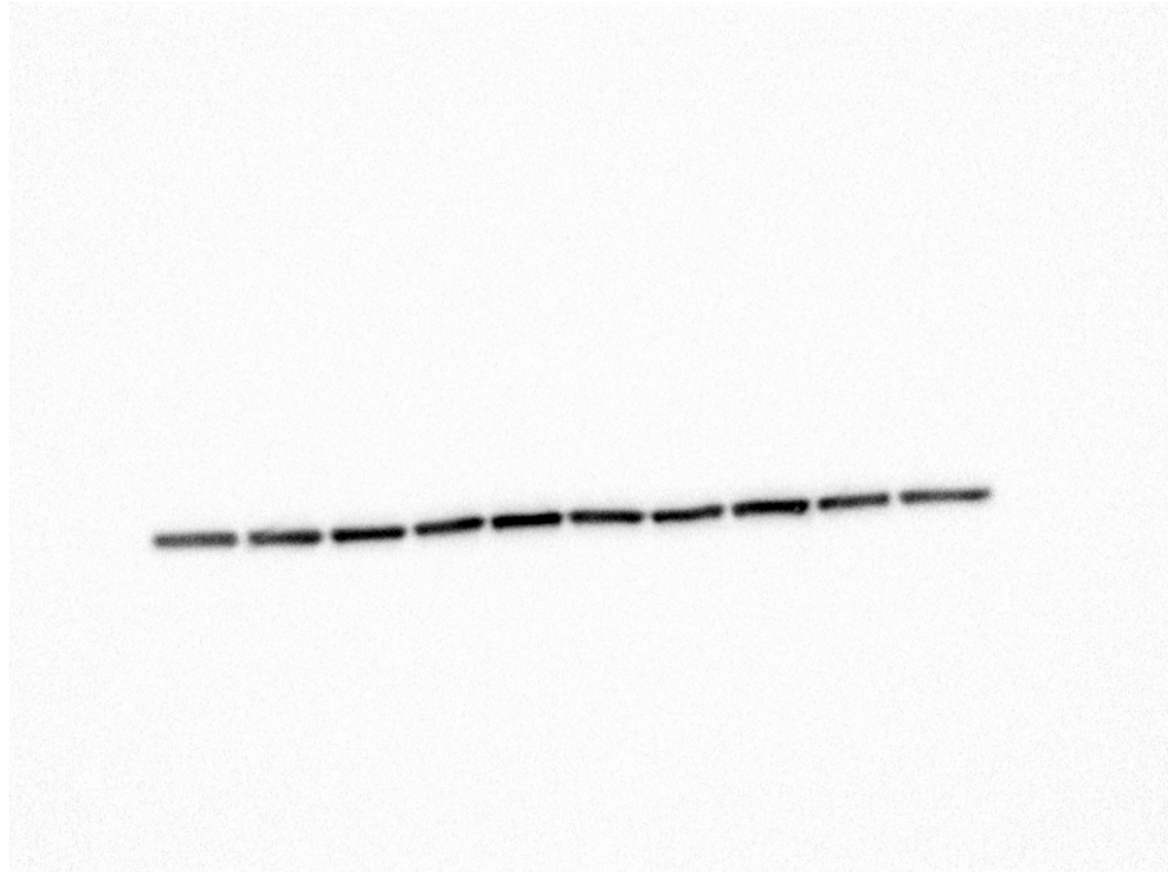

# Figure 4C aFLAG

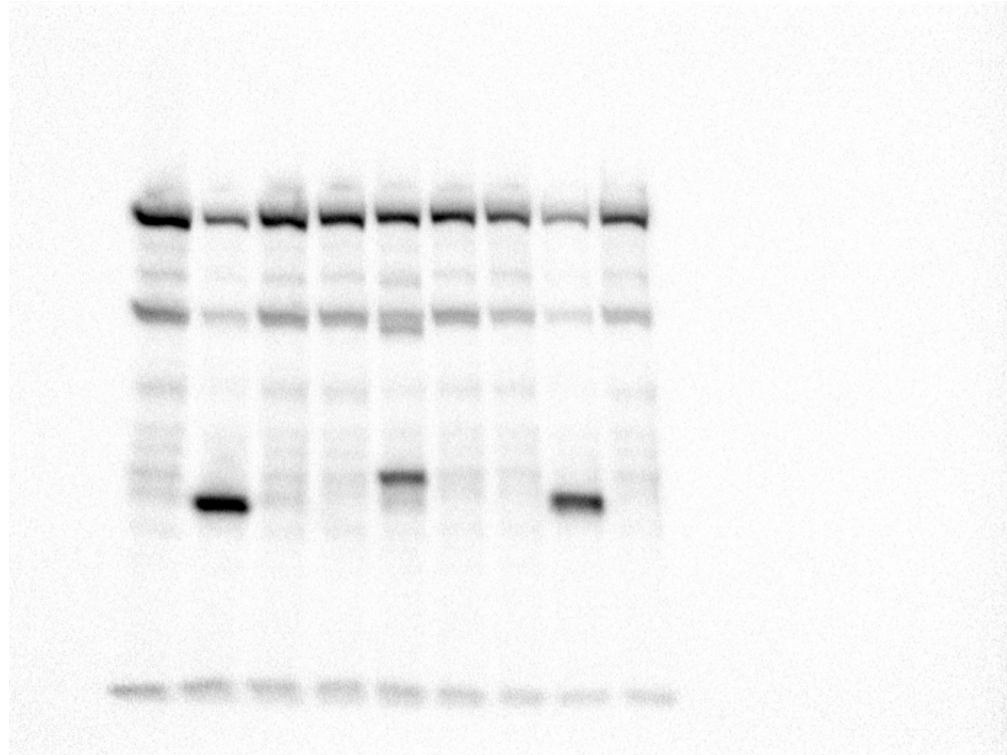

# Figure 4C aHA

low

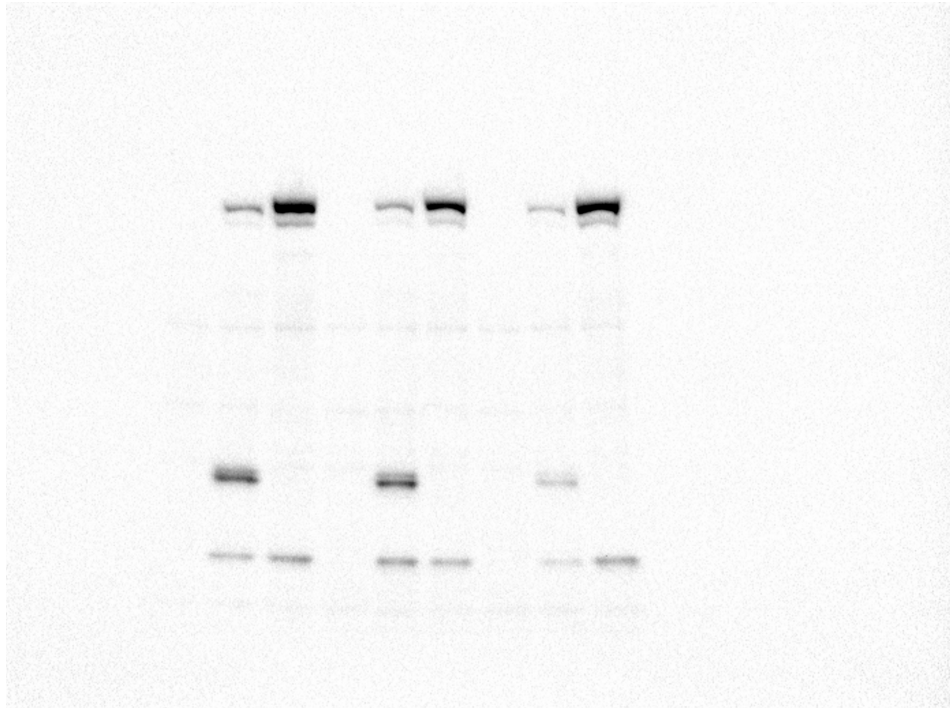

high

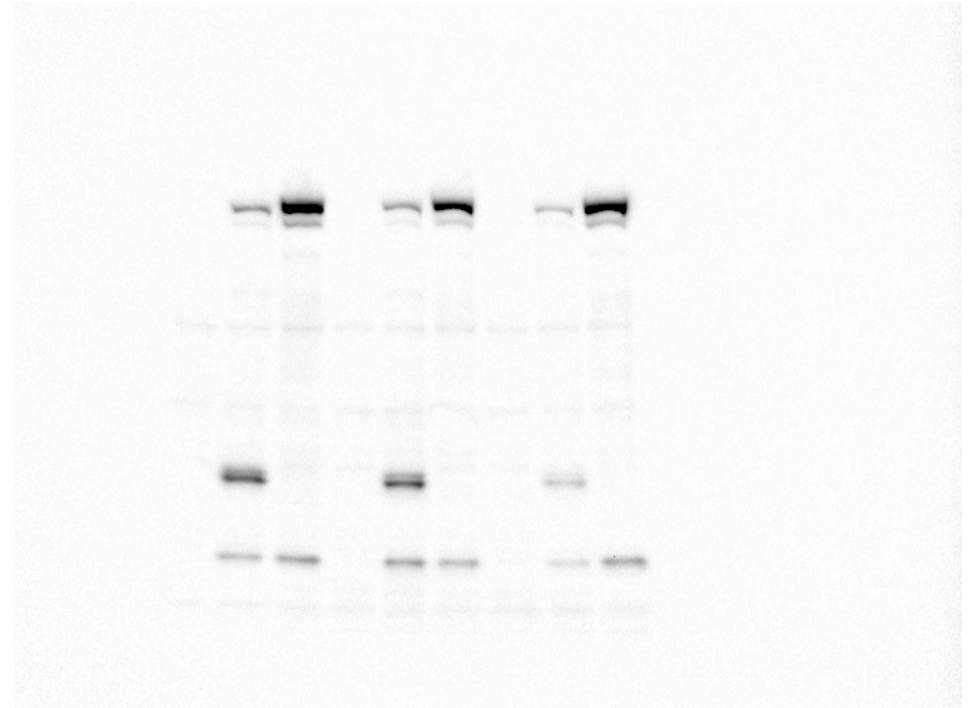

# Figure 4C aGAPDH

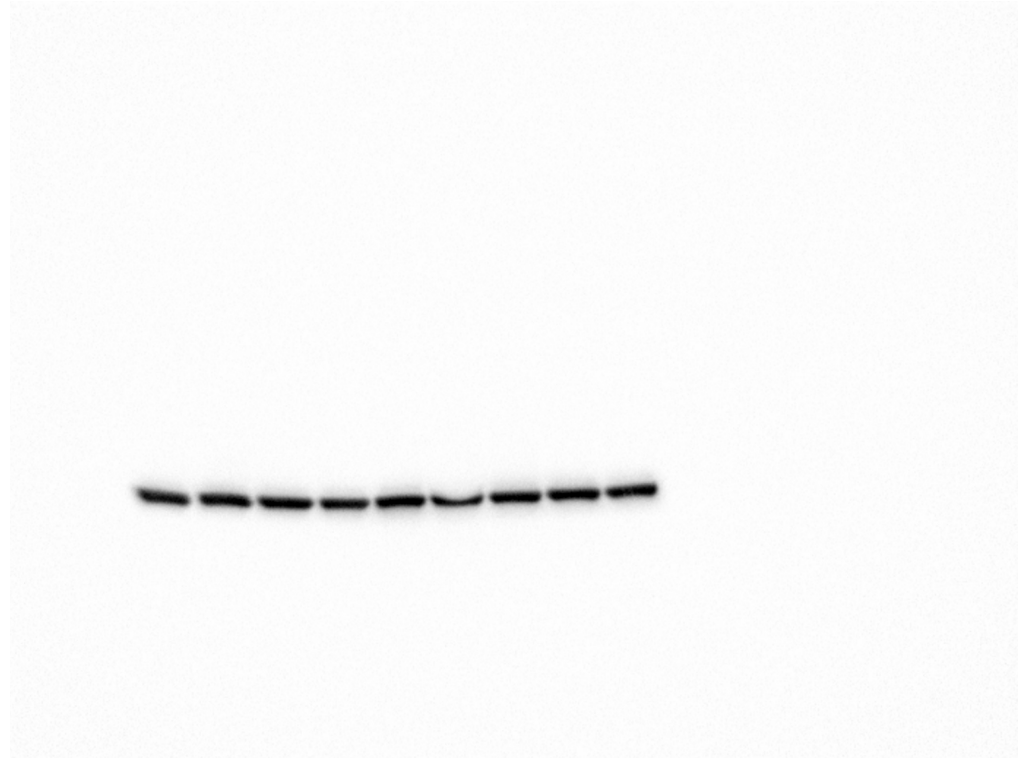

Figure 5B aFLAG

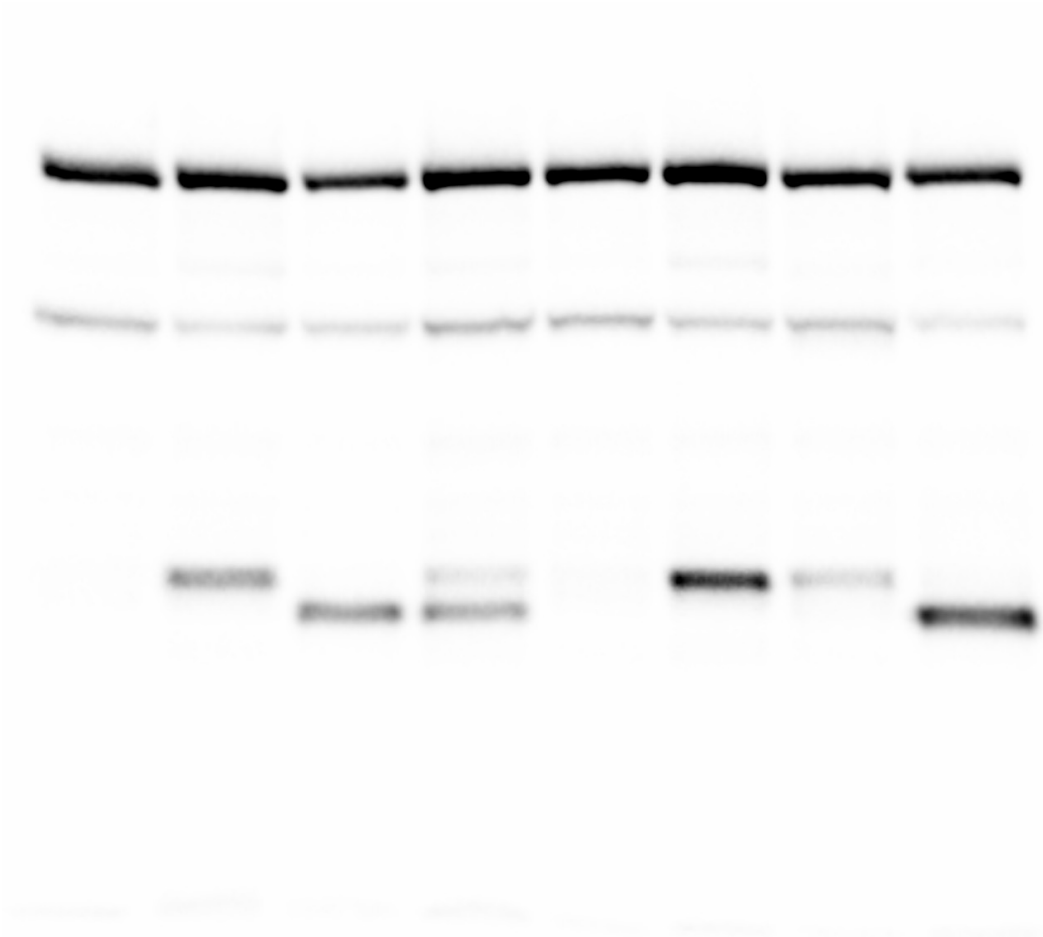



Figure 5B aHA

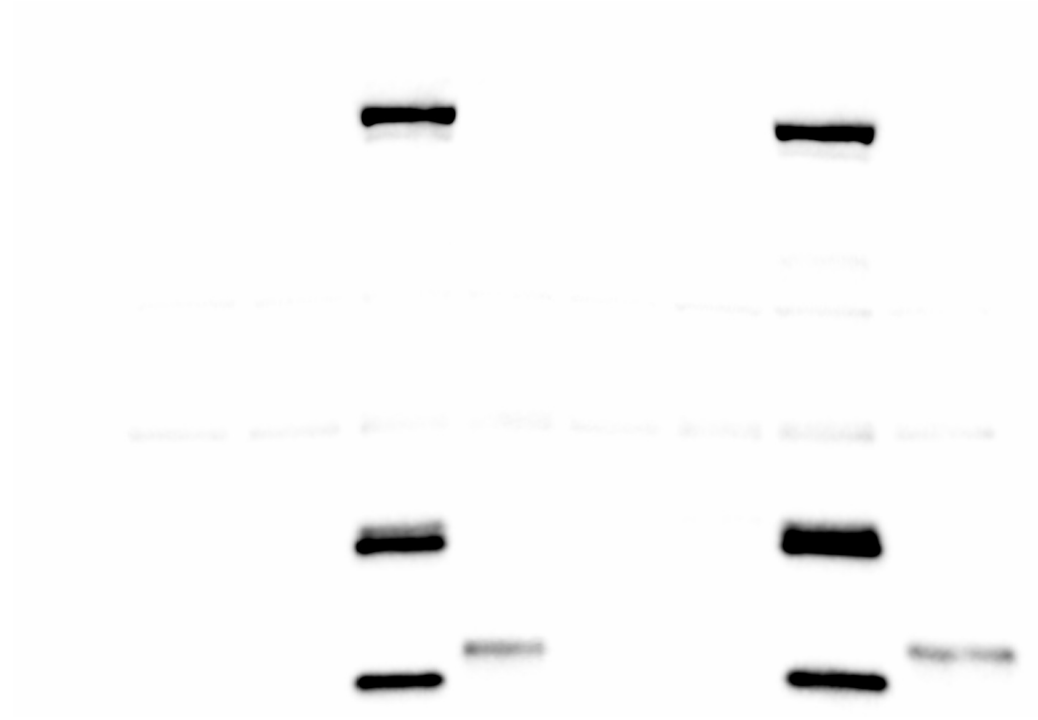

# Figure 5B aGAPDH

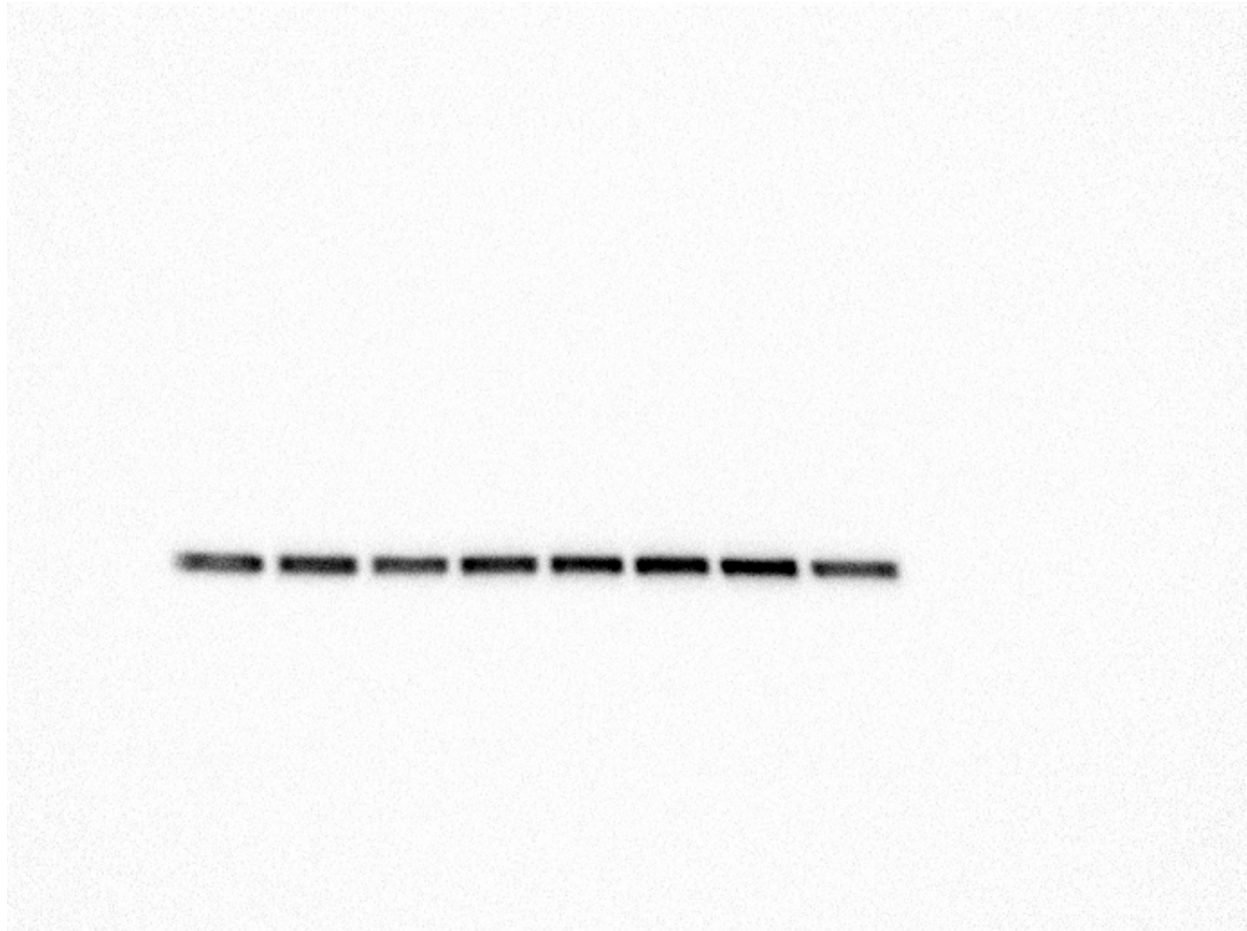

Figure 5C aV5

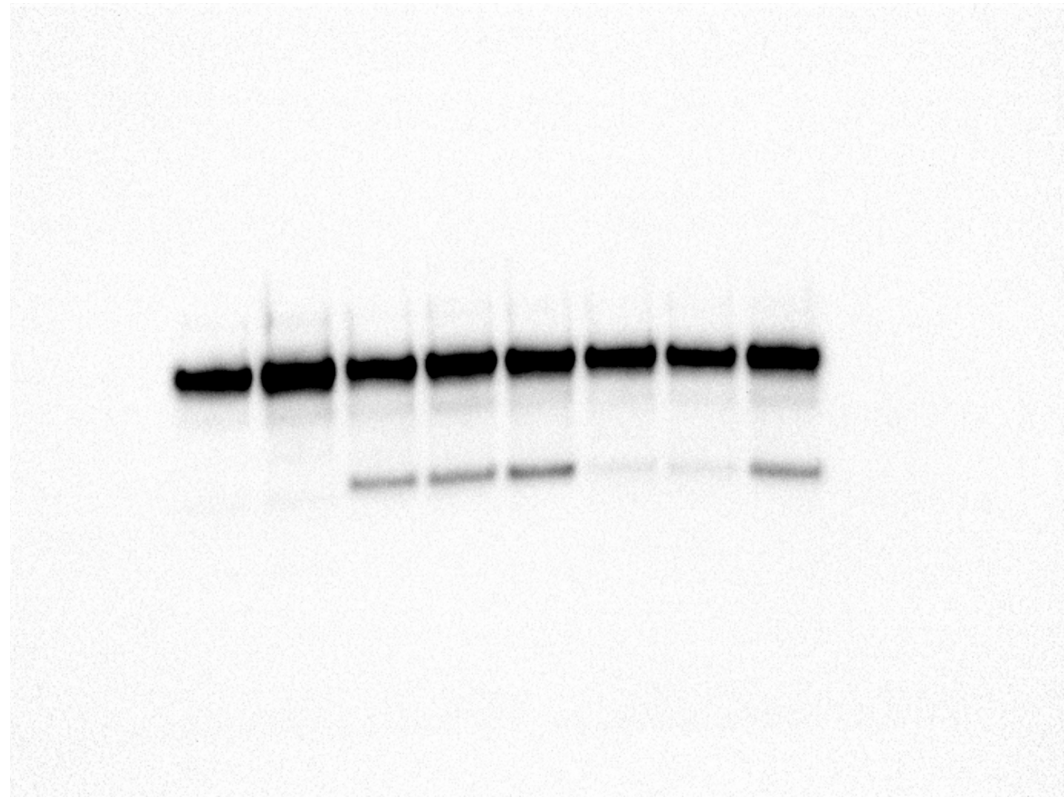

Figure 5C aMyc

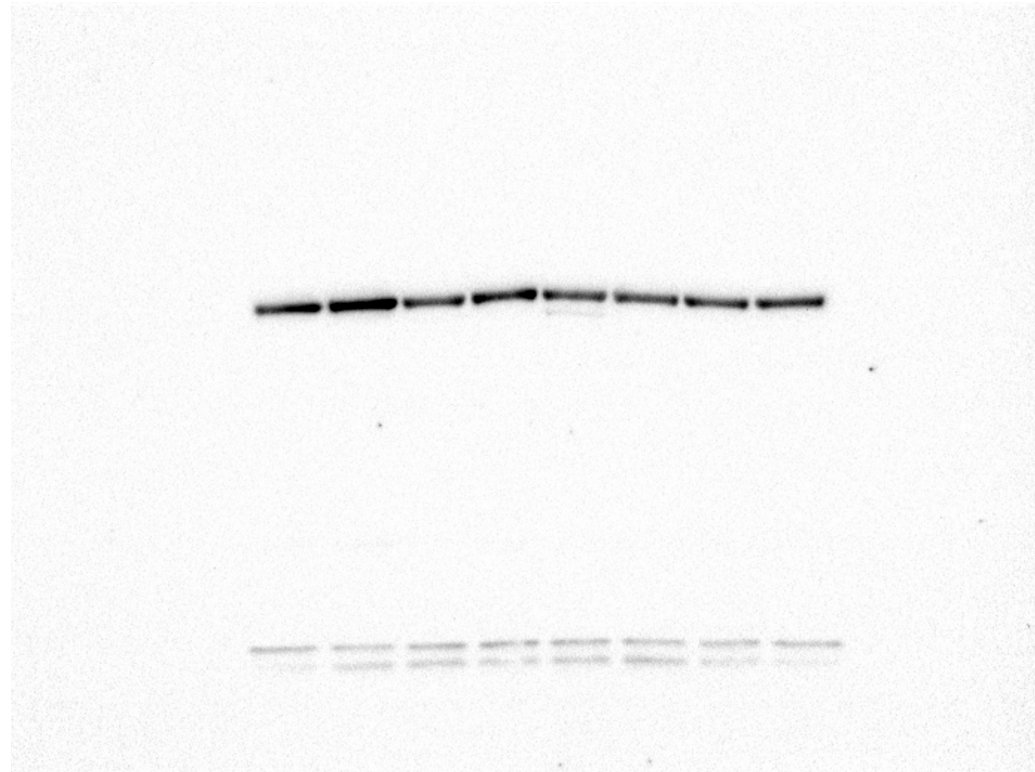

Figure 5C aHA

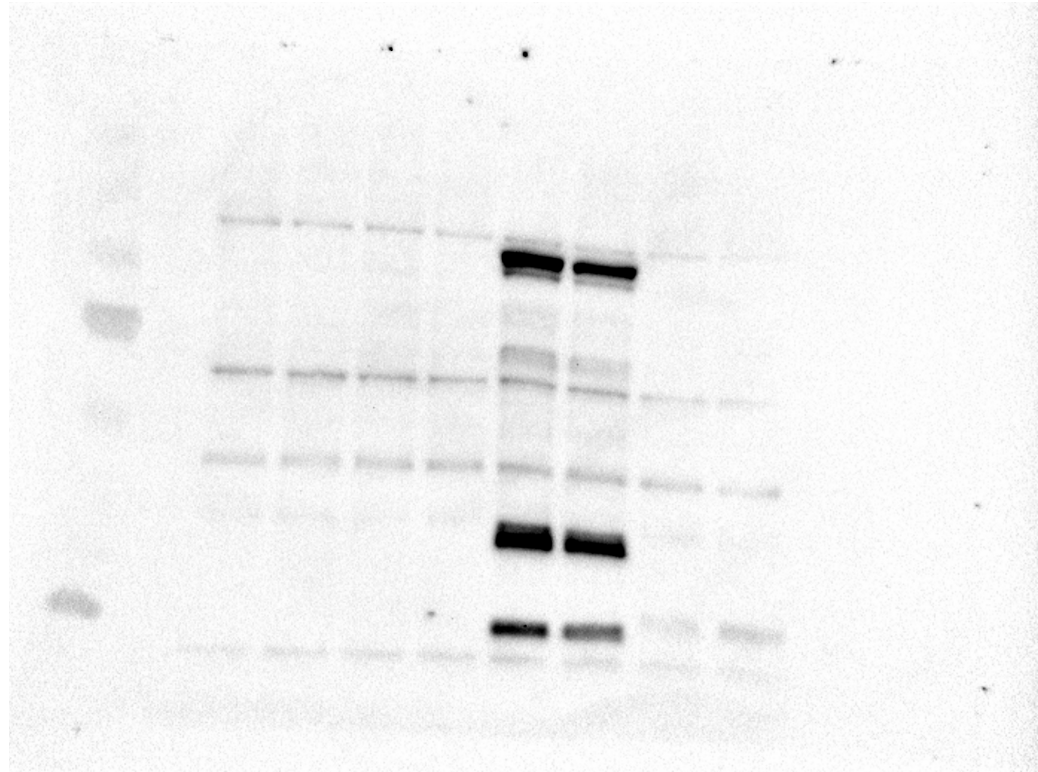

# Figure 5C aGAPDH

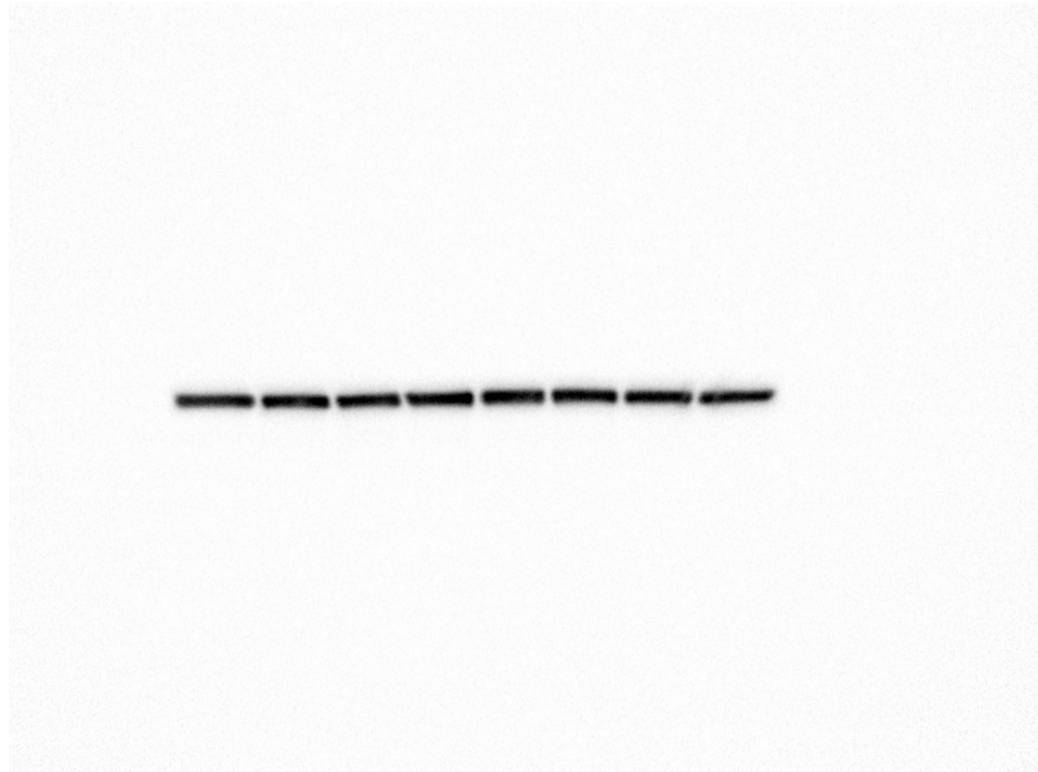

Figure S4-WT-Q37A-Q61A-aV5

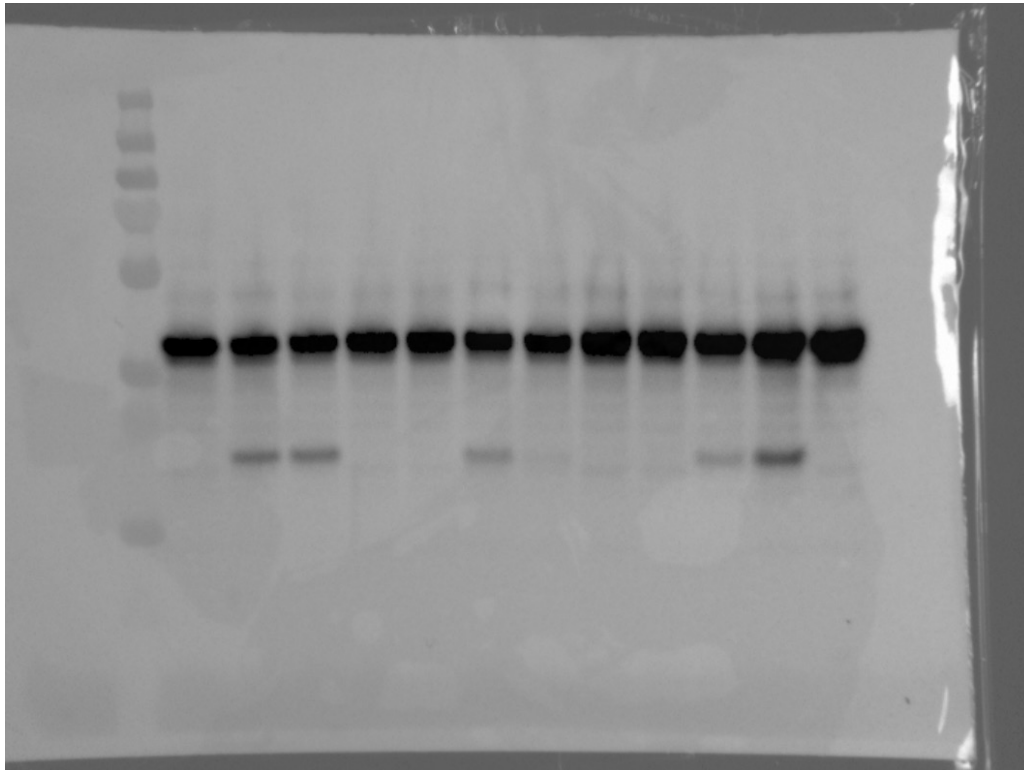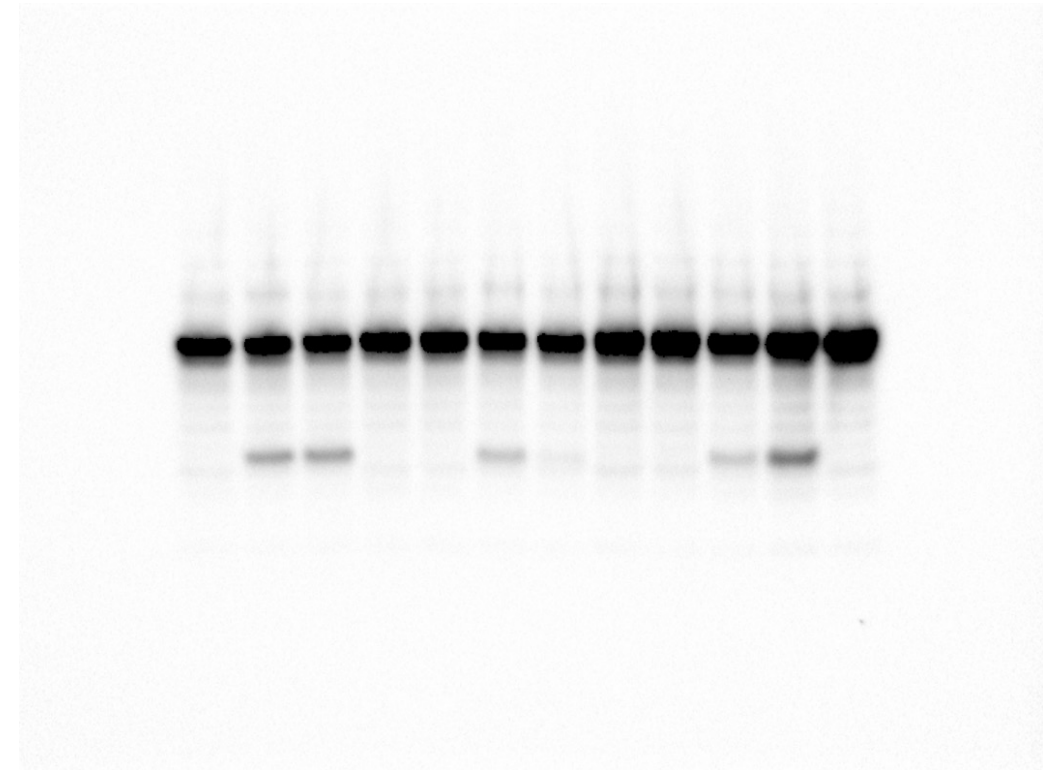

Figure S4-WT-Q37A-Q61A-aGAPDH

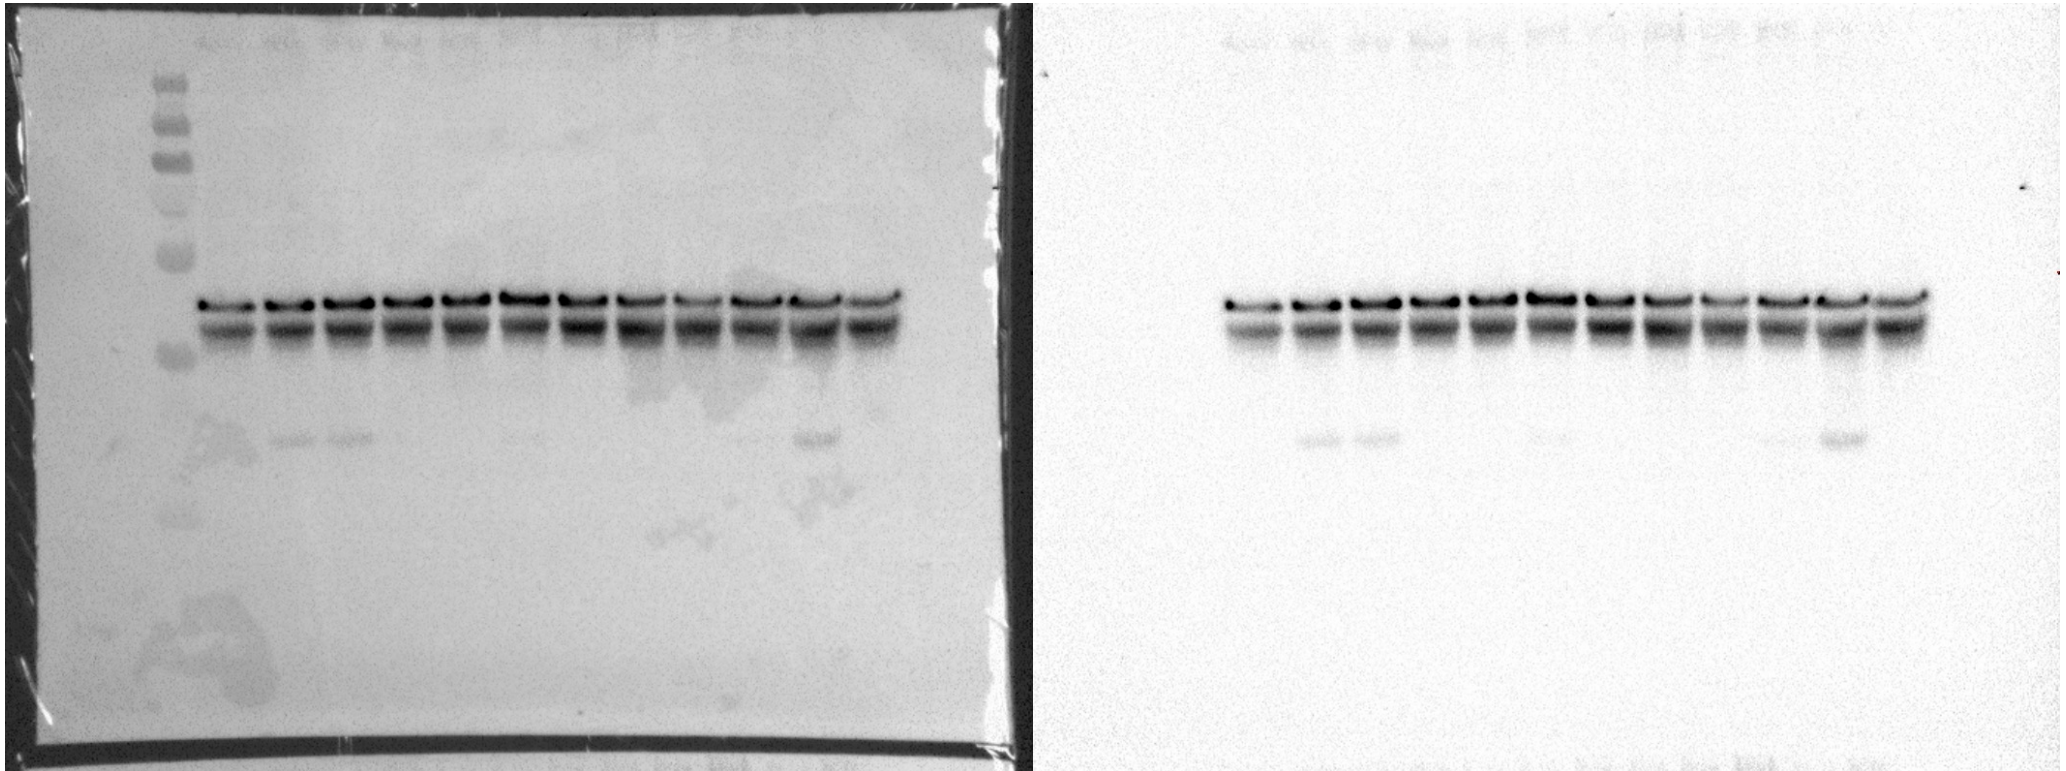



Figure S4-WT-Q61A-Q37A+Q61A-aV5

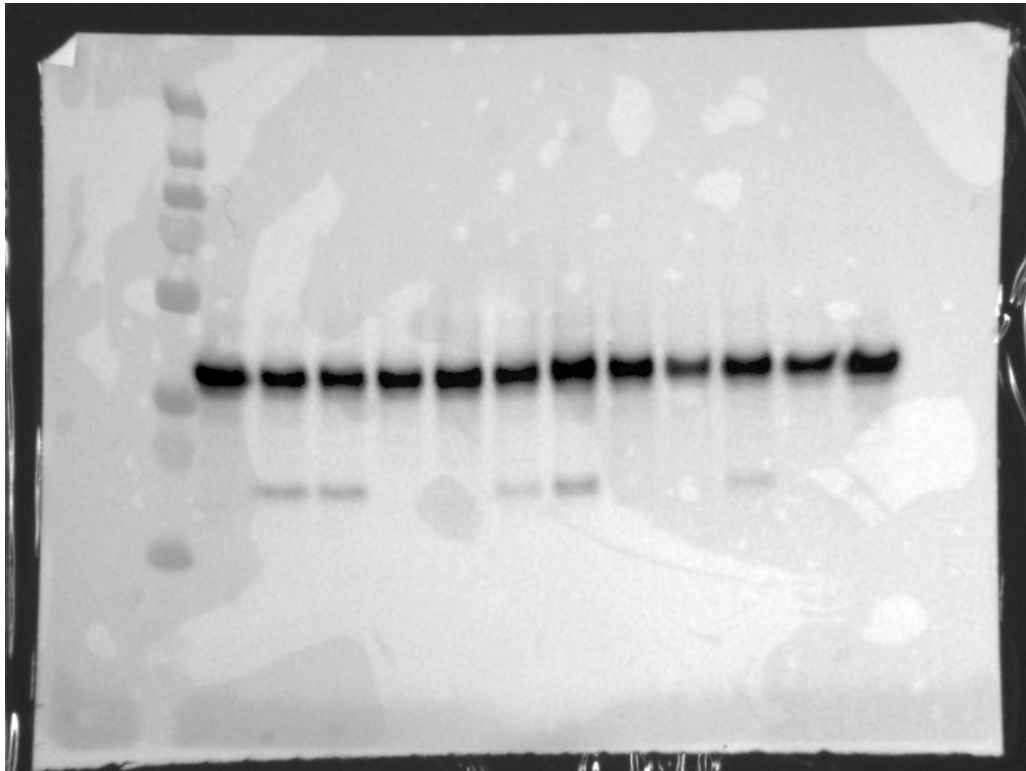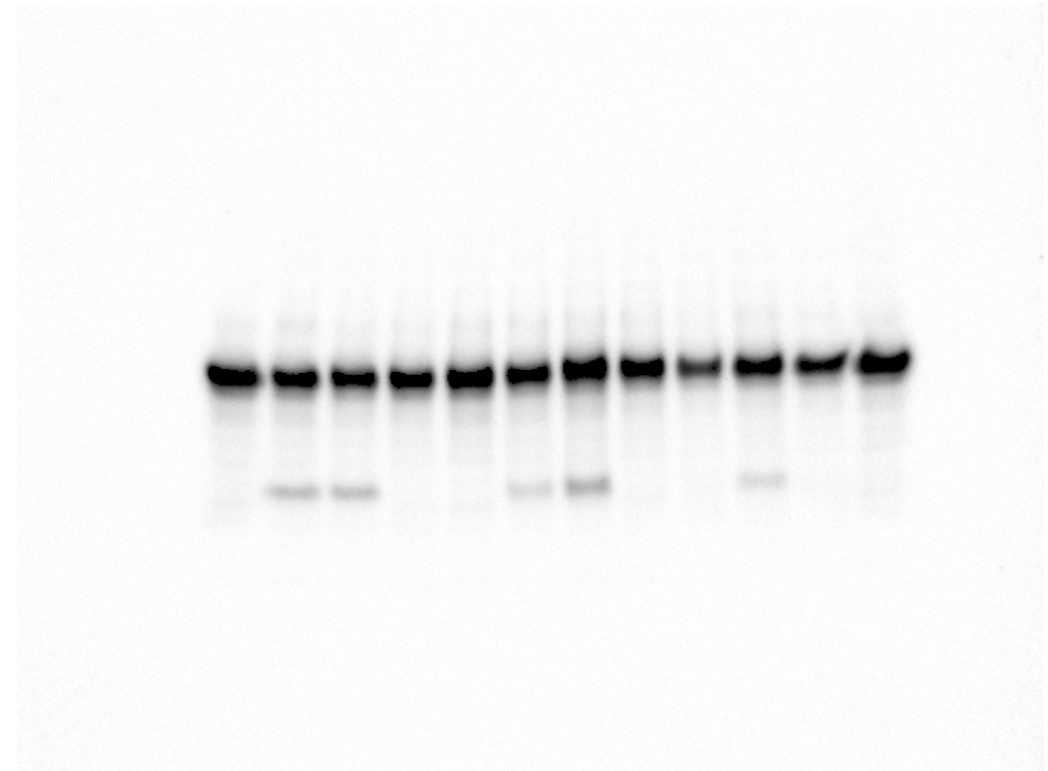

Figure S4-WT-Q61A-Q37A+Q61A-aGAPDH

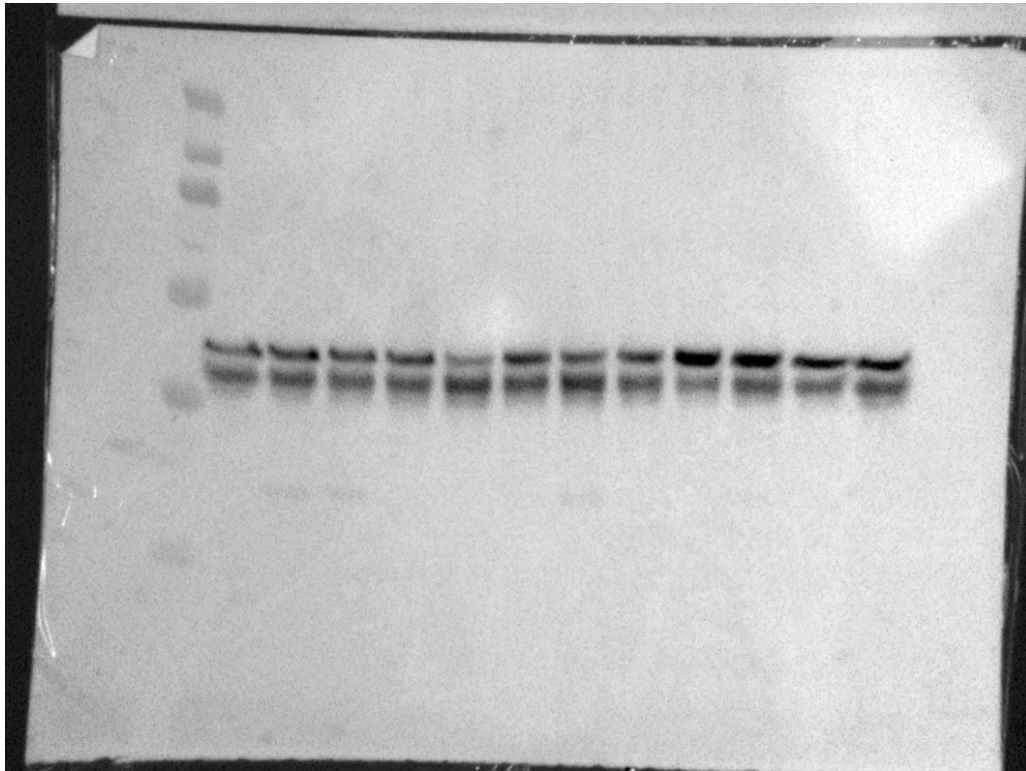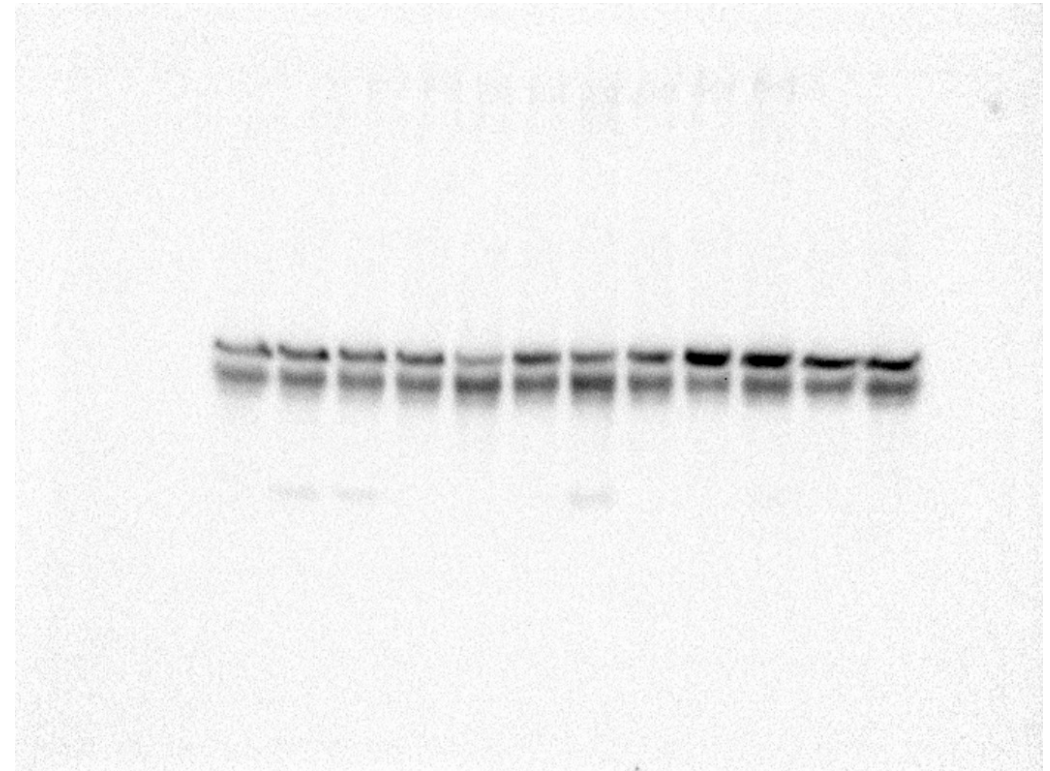

Figure S4-Q37A-Q61A-Q37A+Q61A-aV5

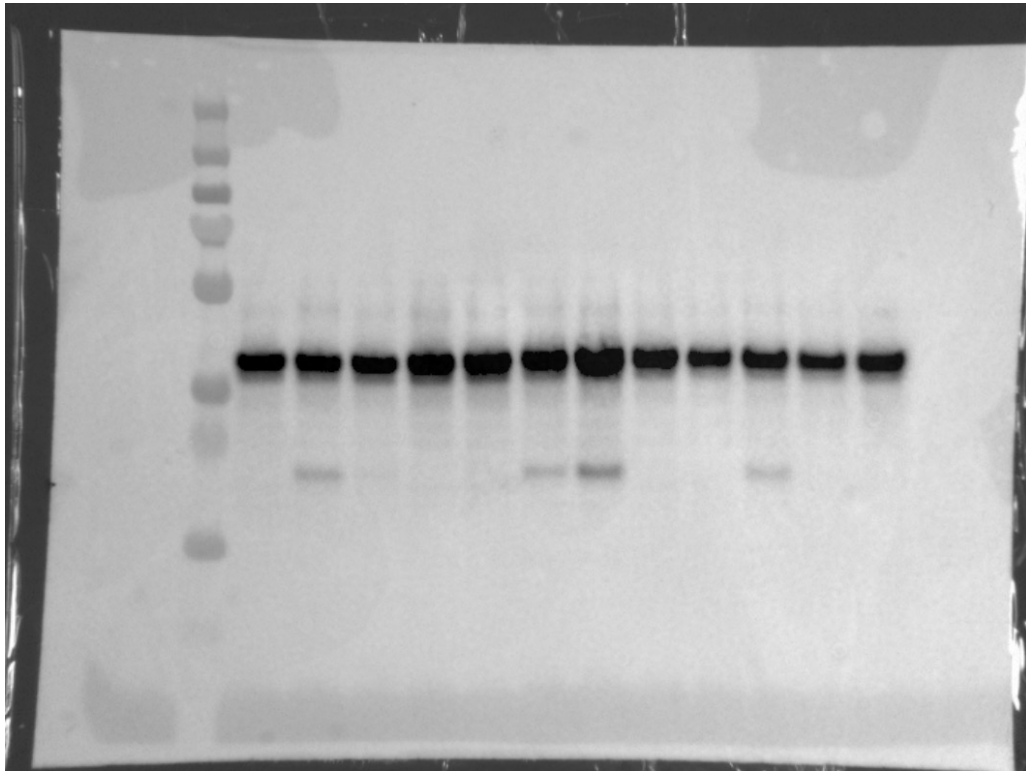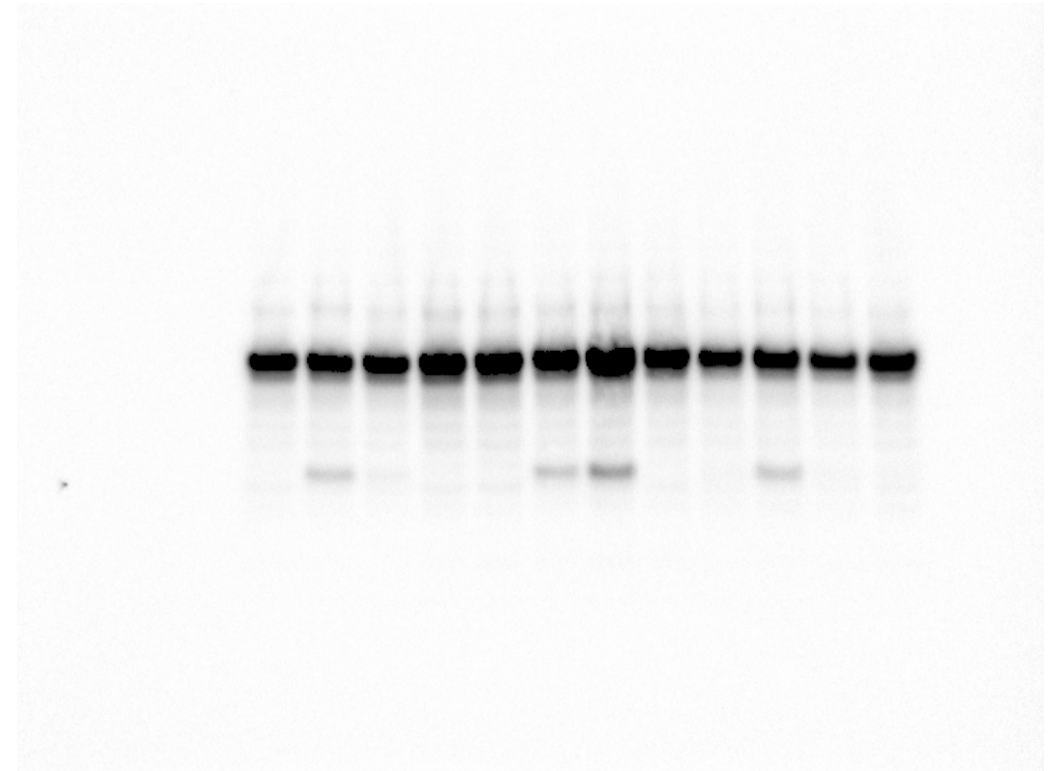

Figure S4-Q37A-Q61A-Q37A+Q61A-aGAPDH

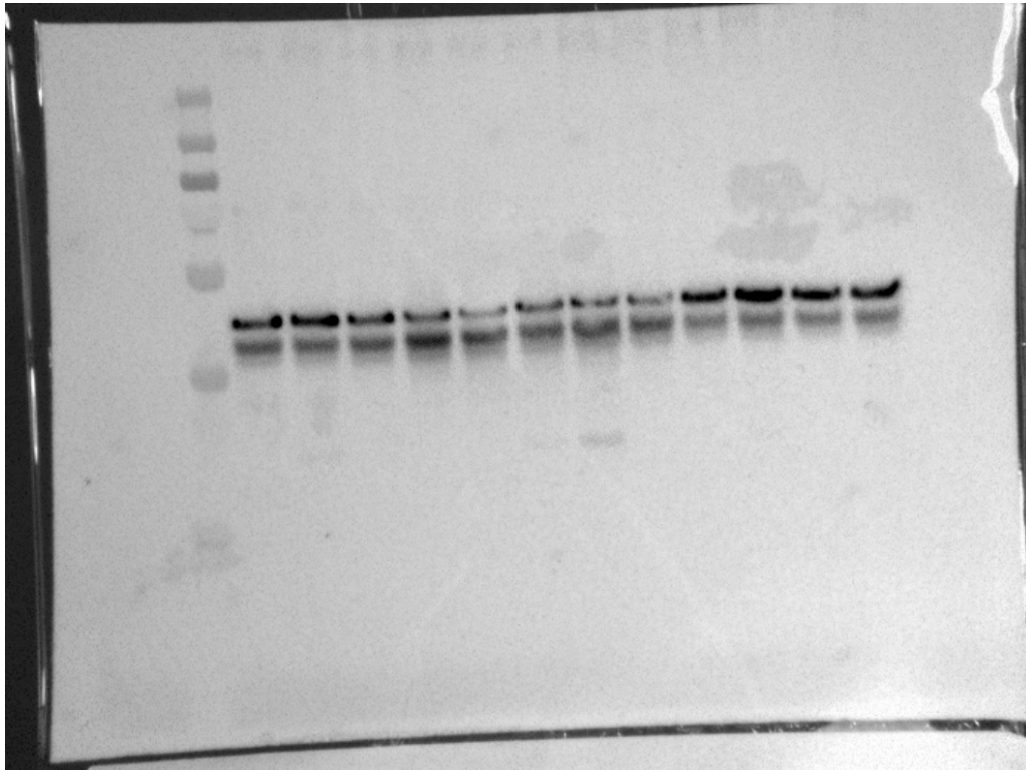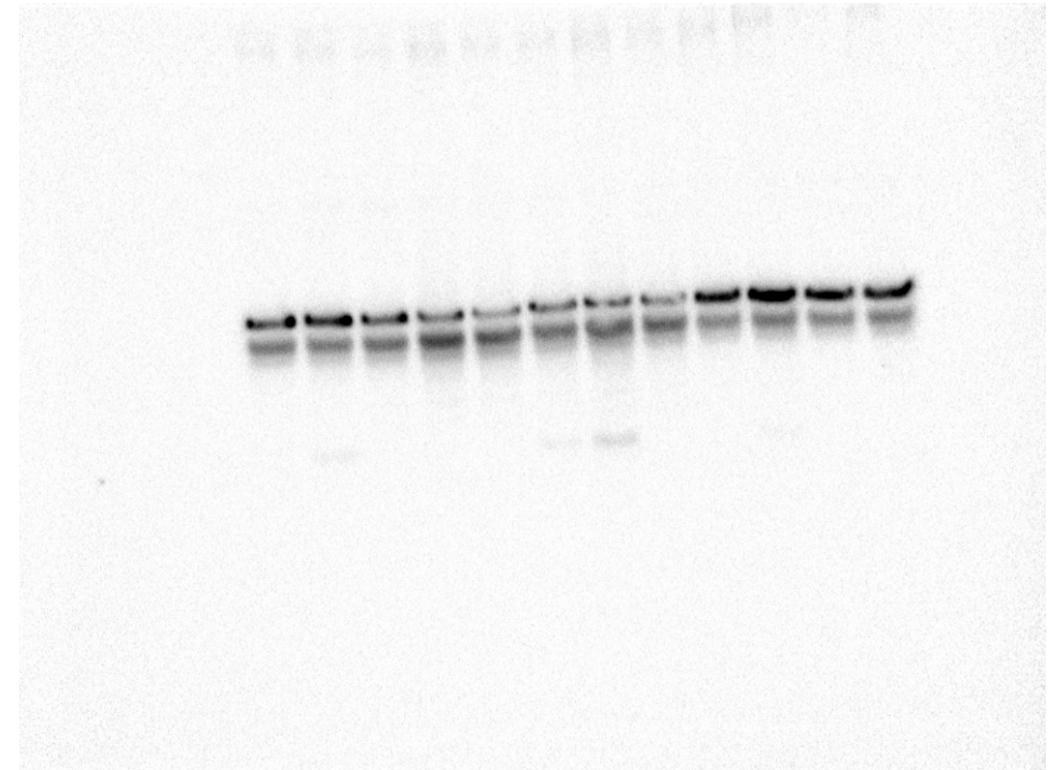

Figure S3 aV5

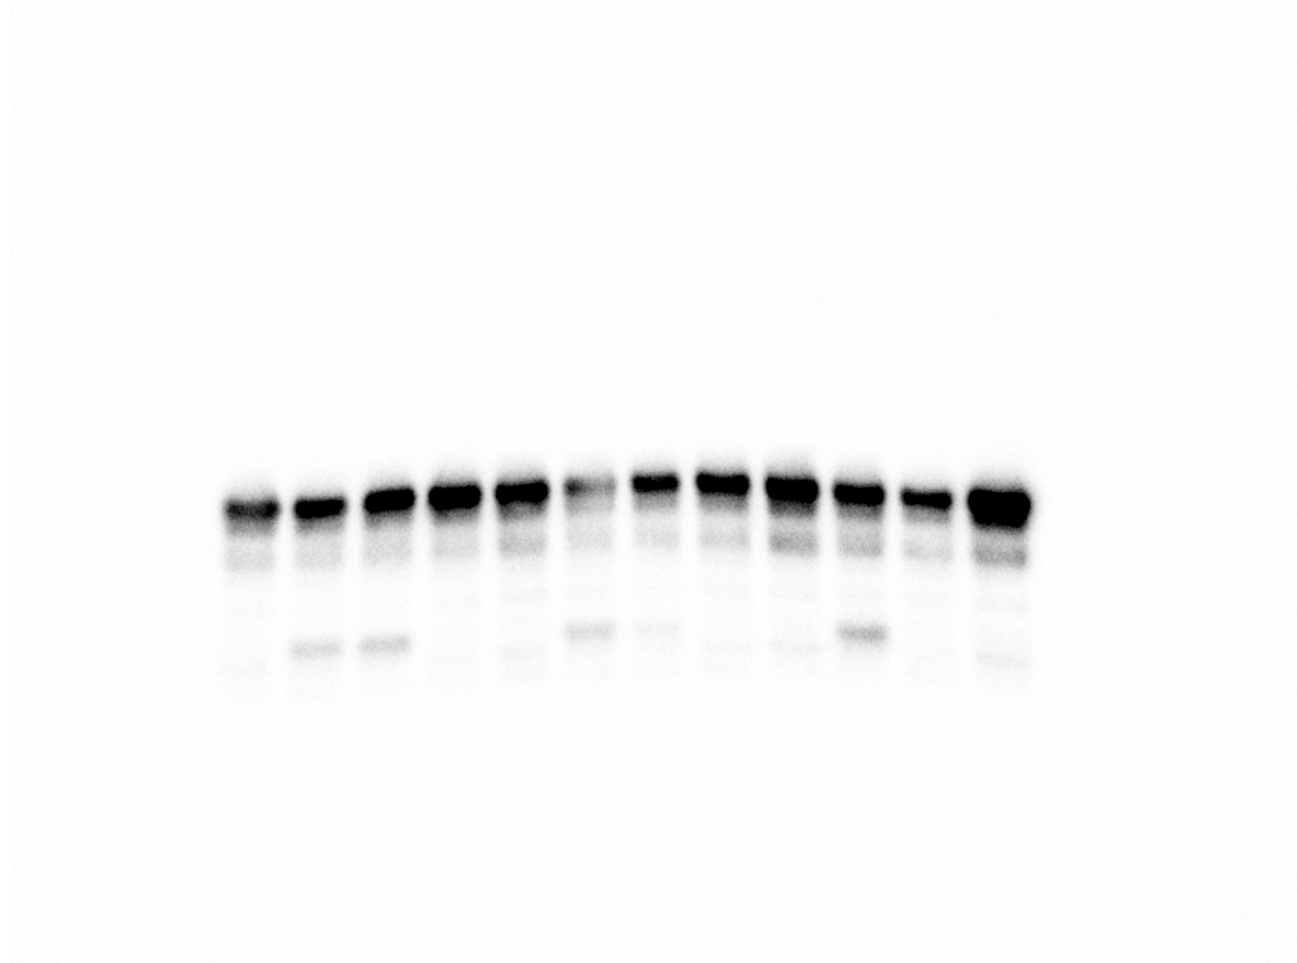

Figure S3 aMyc

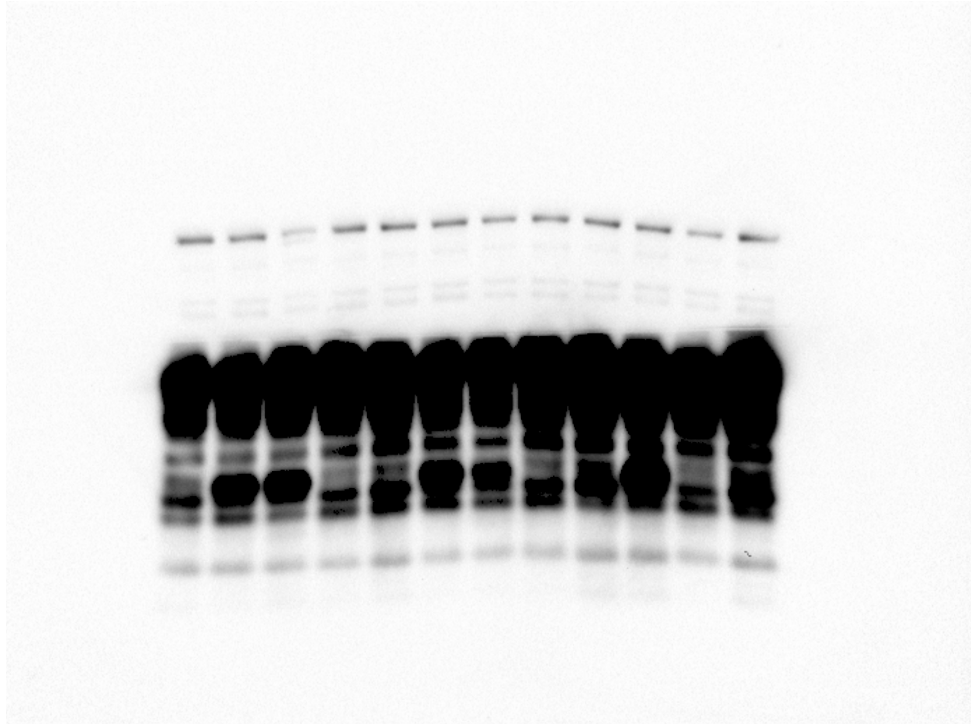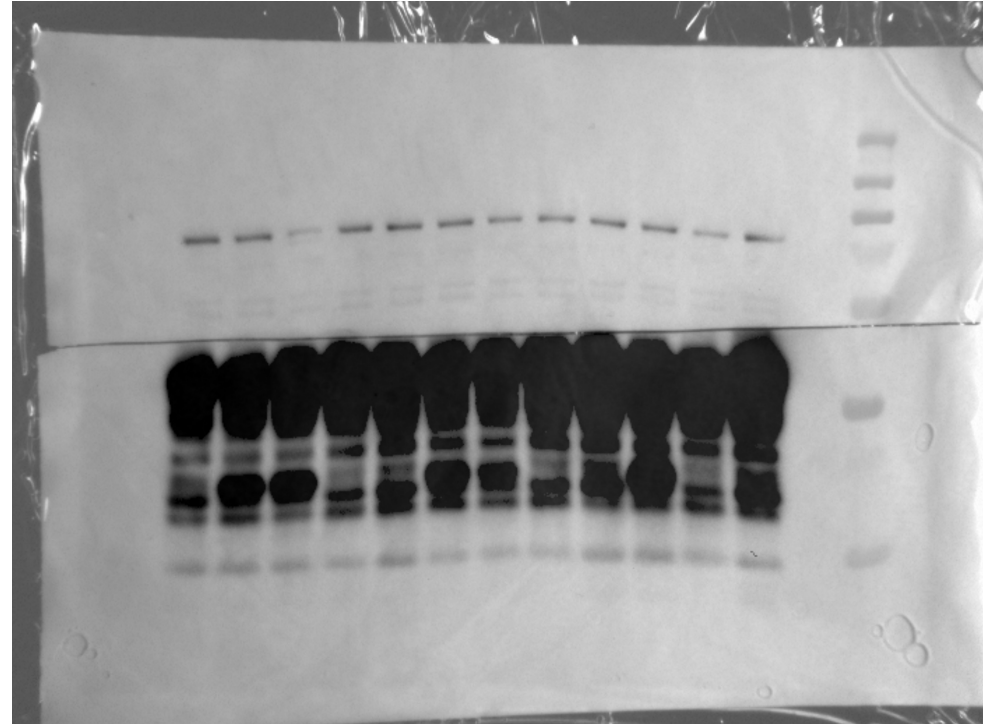

# Figure S3 aHA

low

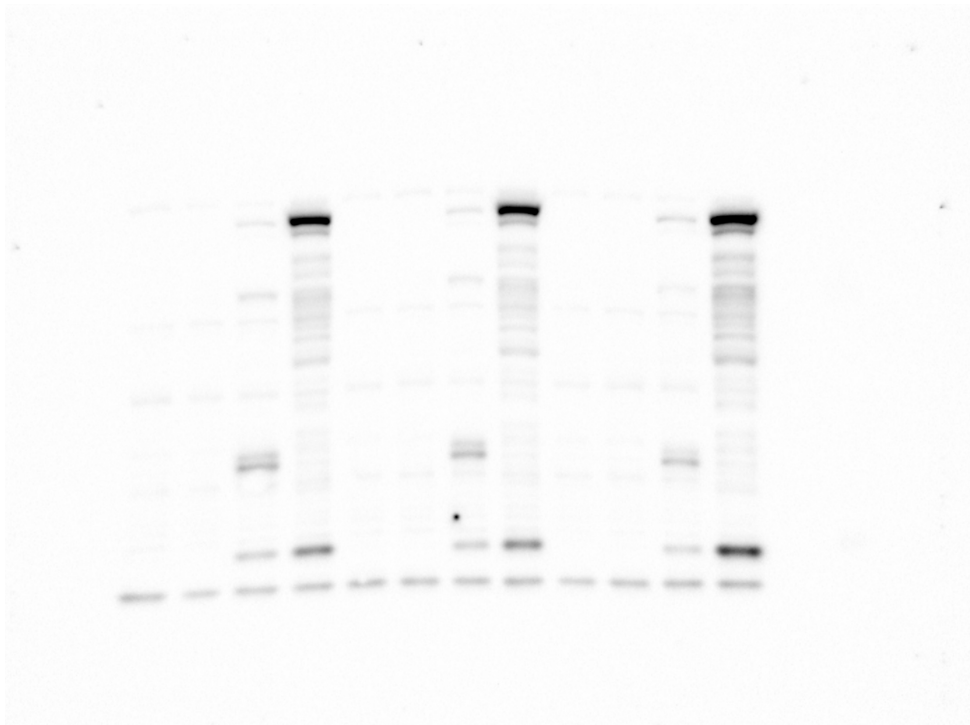

high

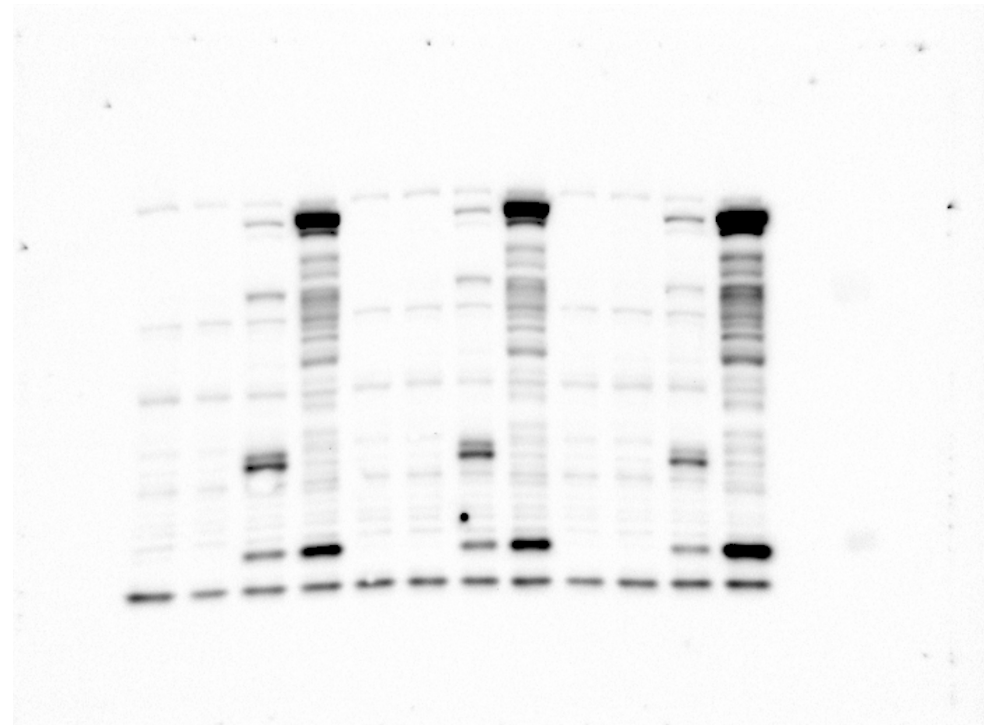

# Figure S3 aGAPDH

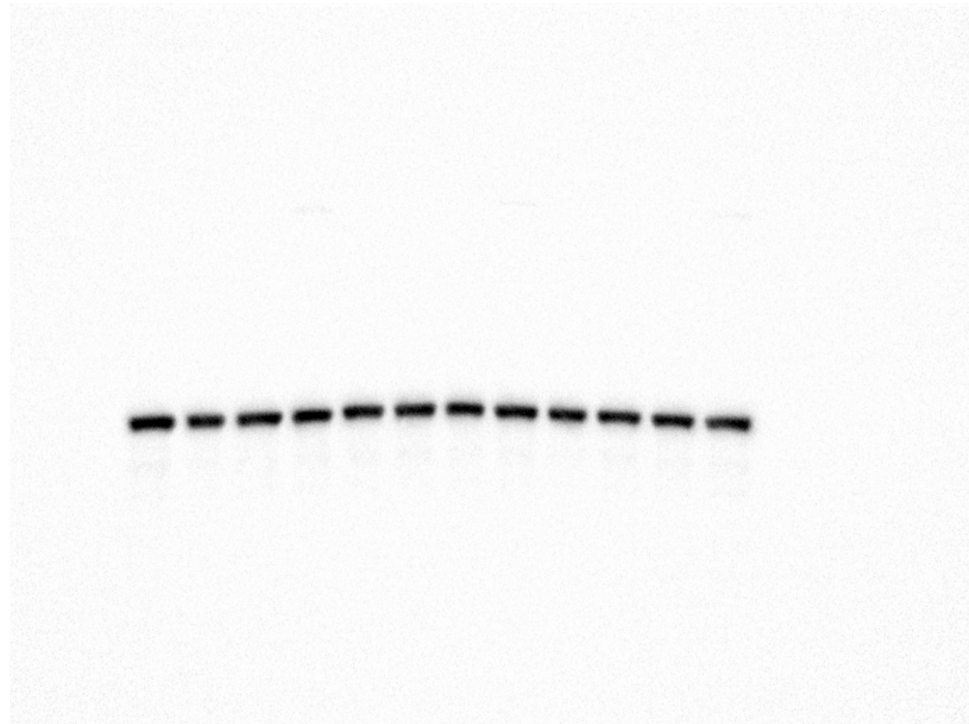



# Figure S5 aV5

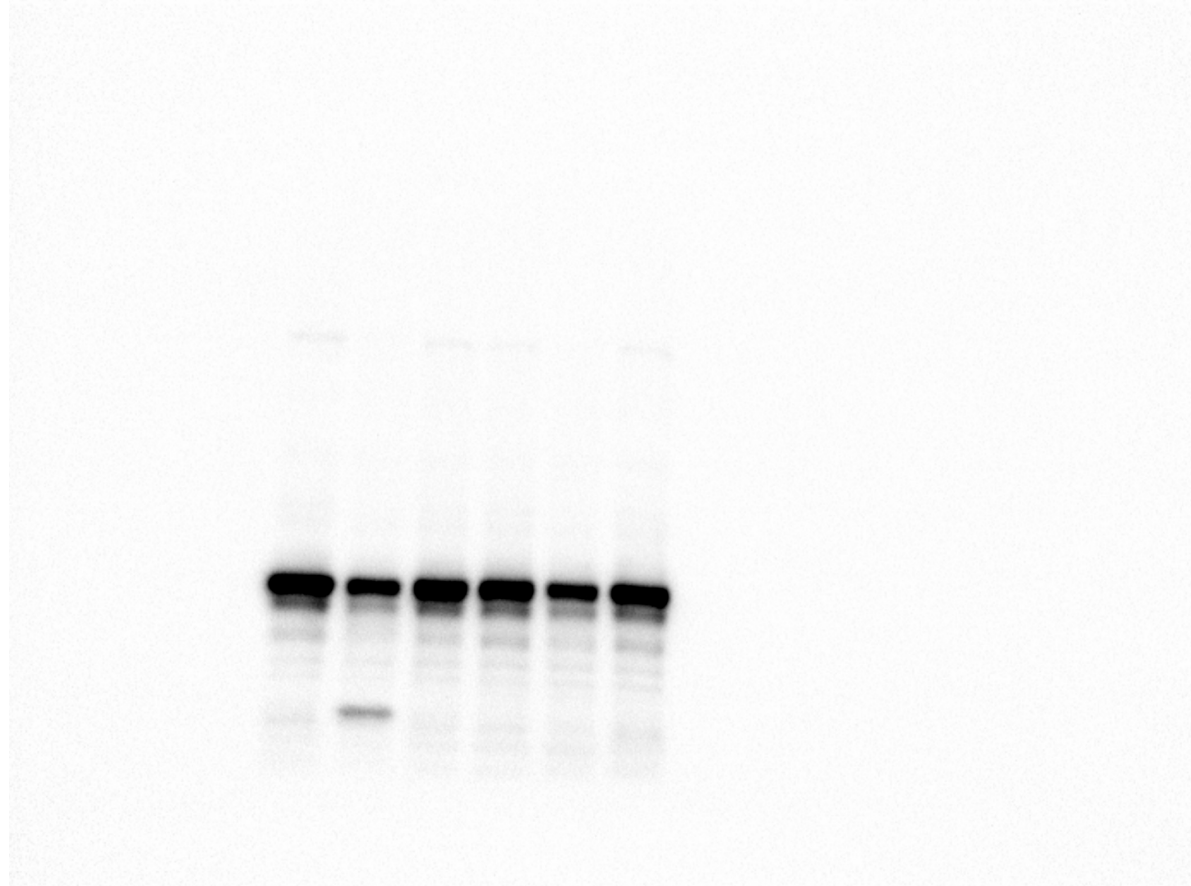

Figure S5 aMyc

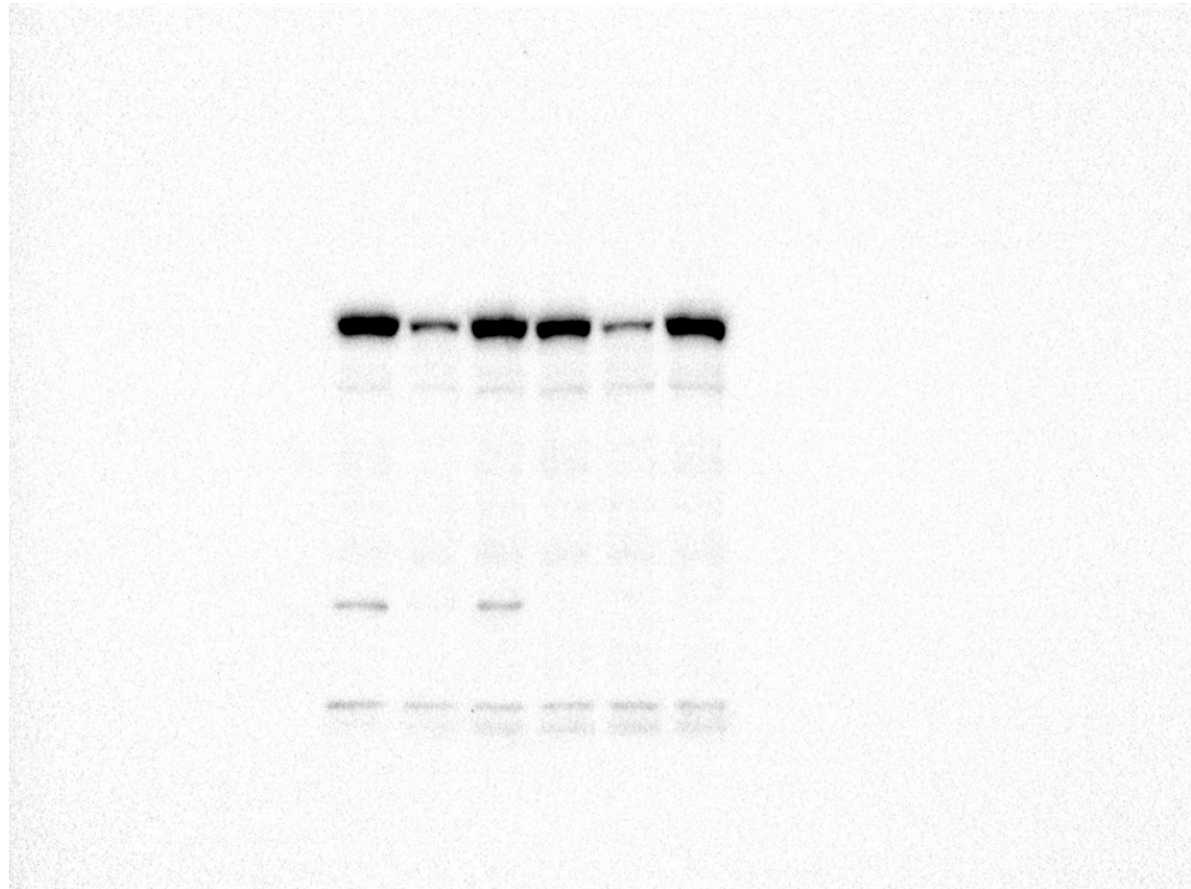

# Figure S5 aHA

low

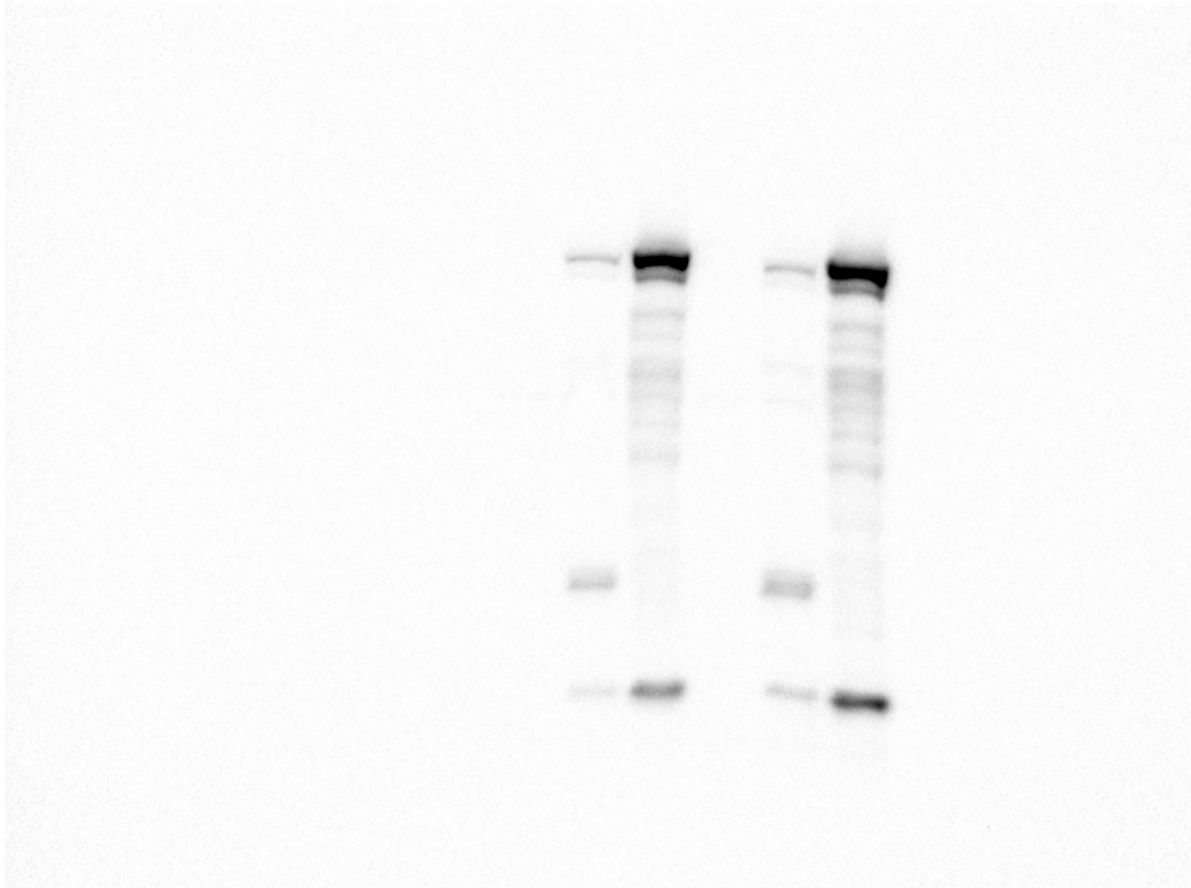

high

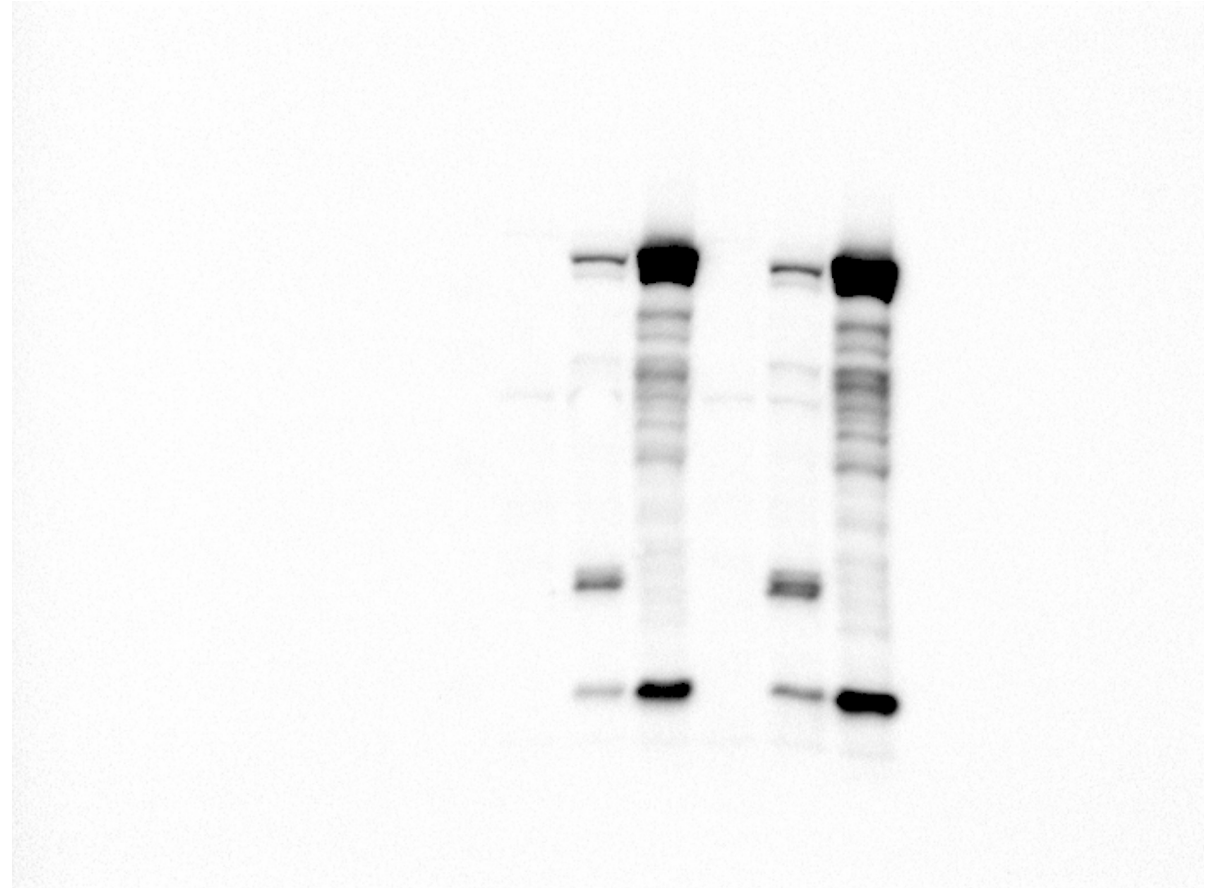

# Figure S5 aGAPDH

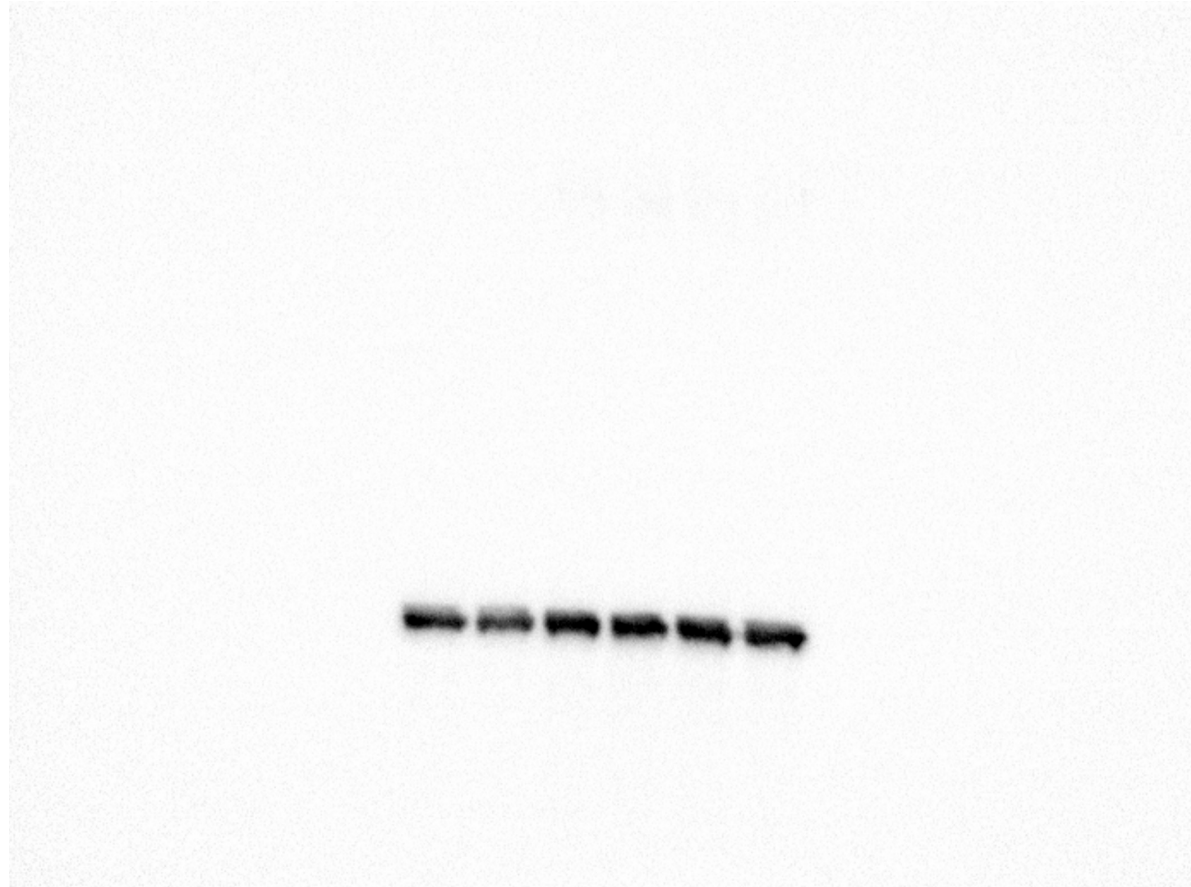

Figure S7a aFLAG

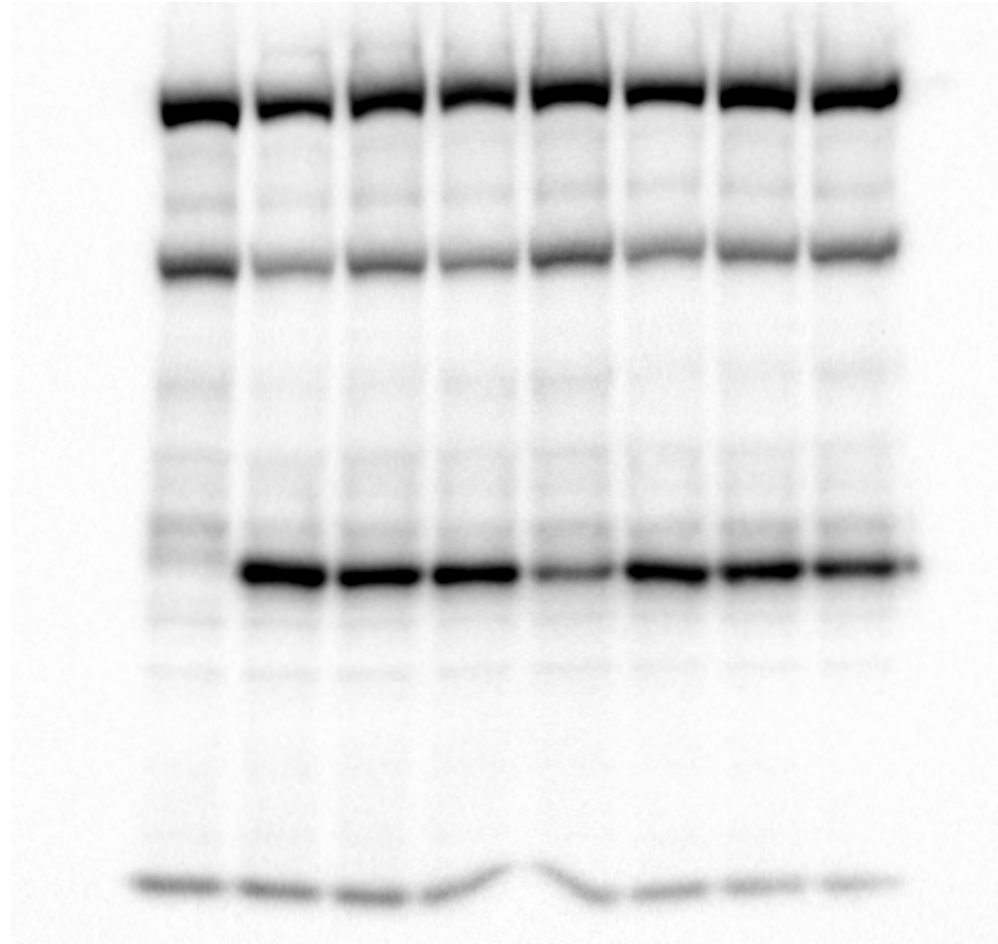

Figure S7a aHA

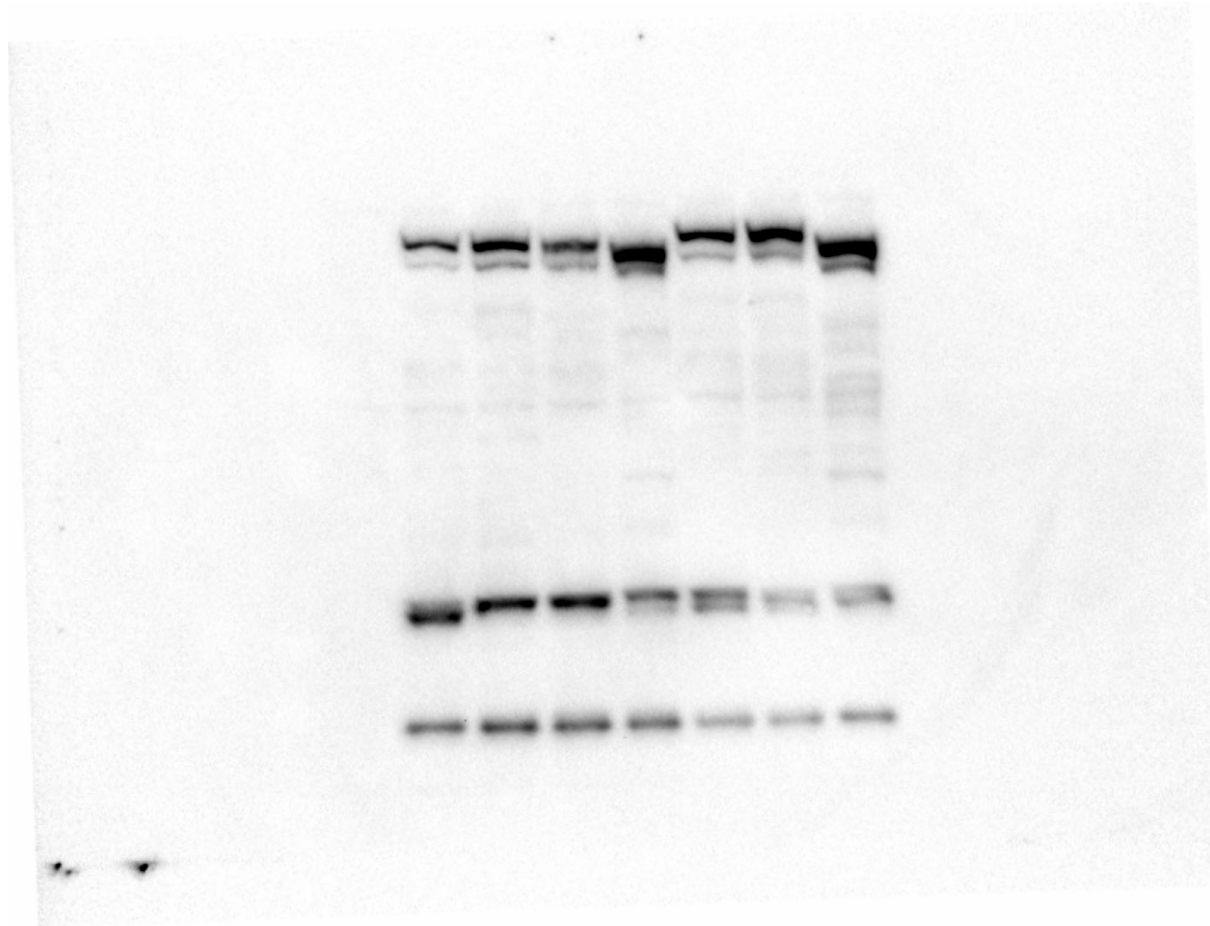

Figure S7a aGAPDH

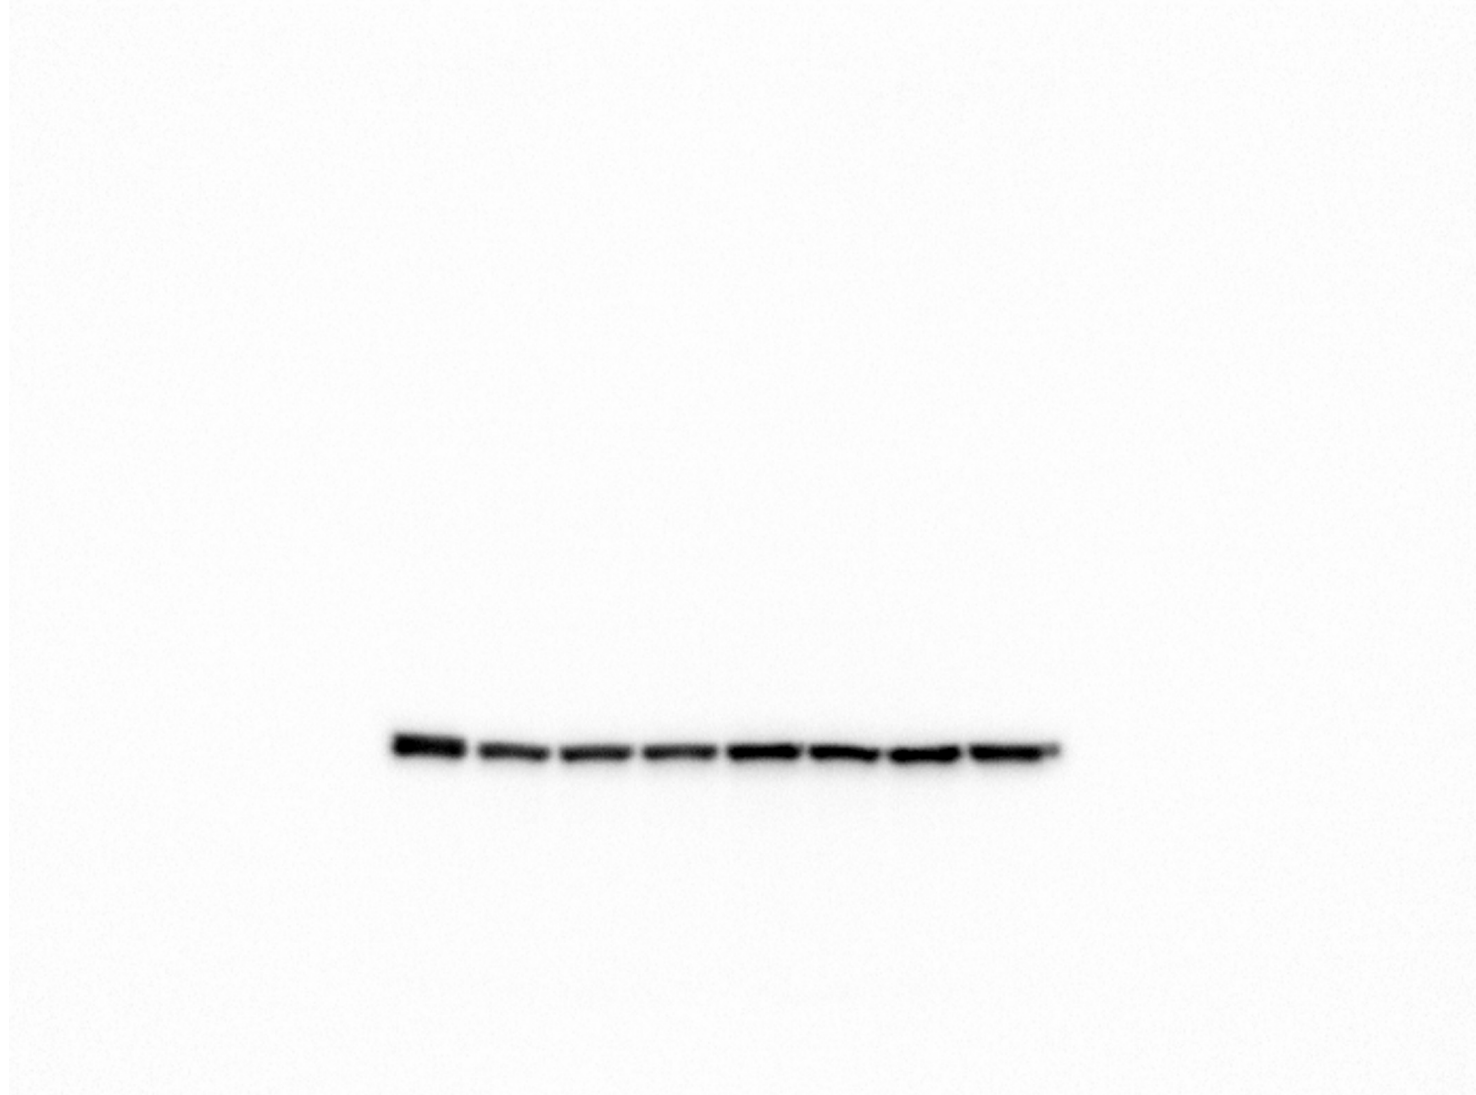

Figure S7b aV5

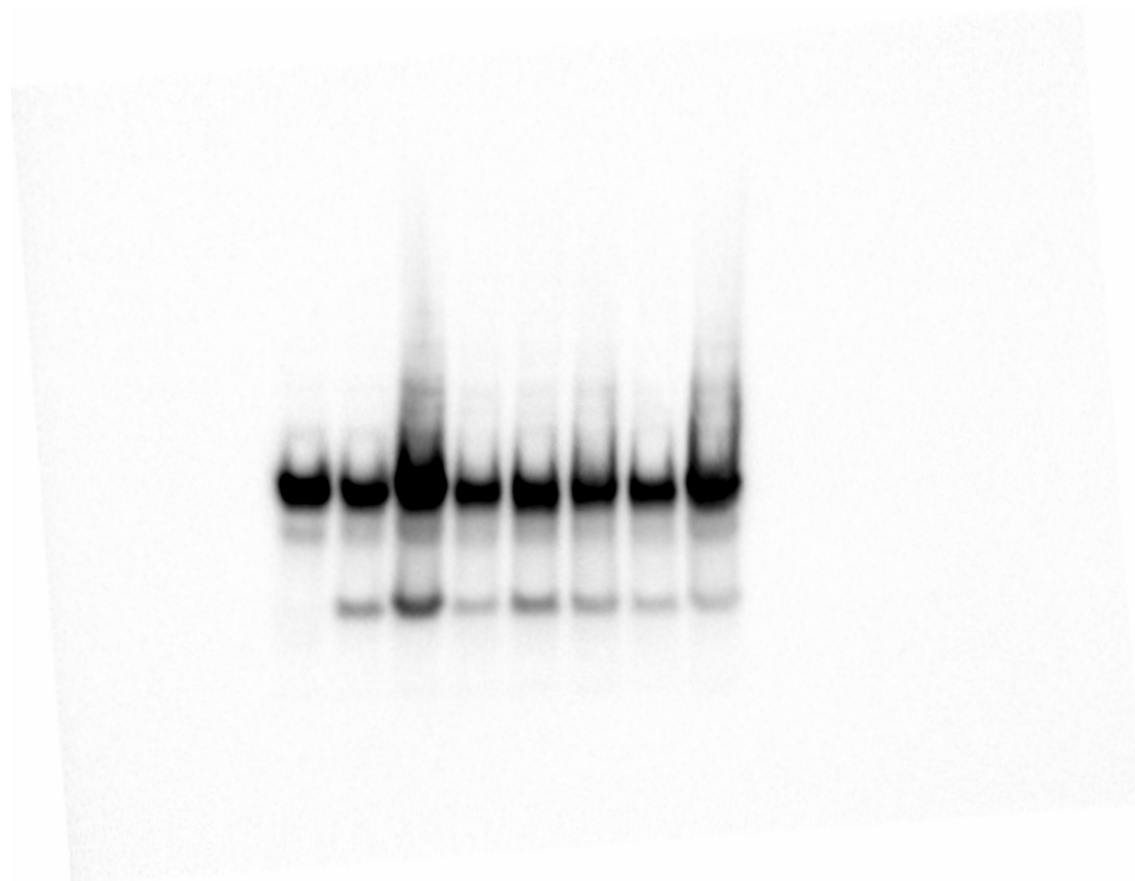



Figure S7b aMyc

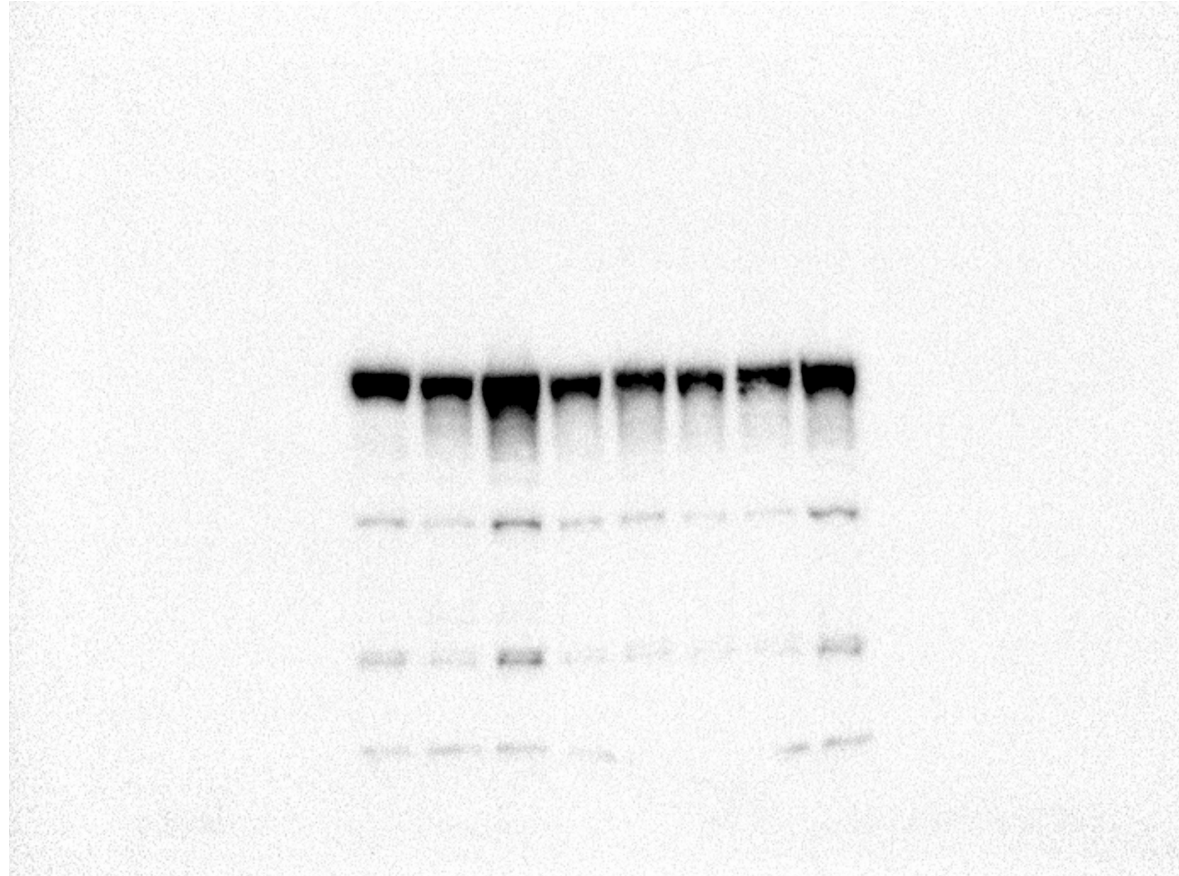

Figure S7b aHA

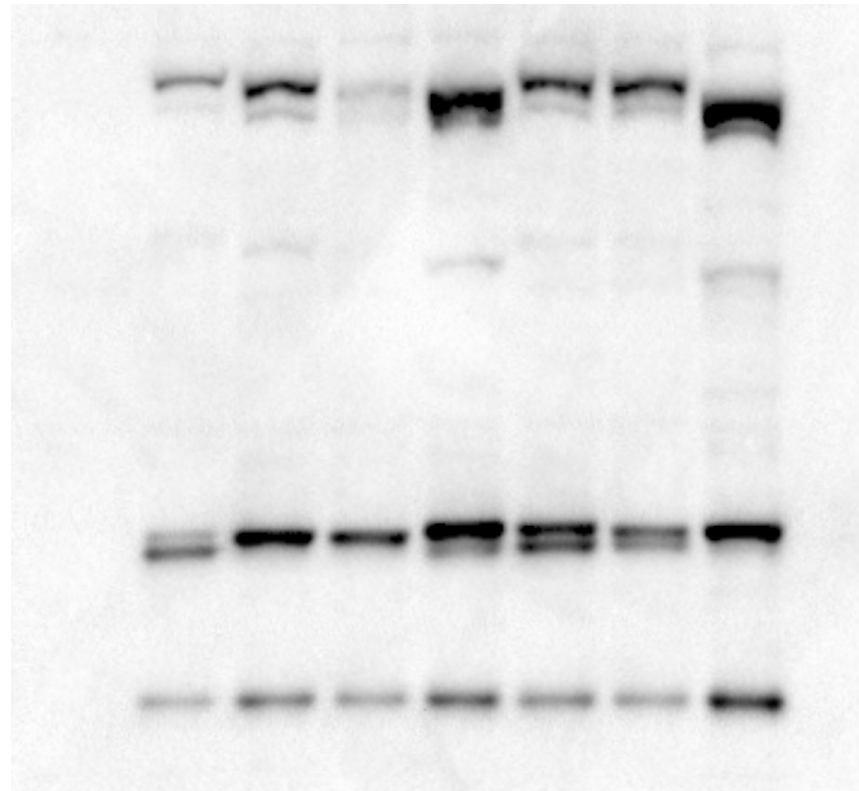

# Figure S7b aGAPDH

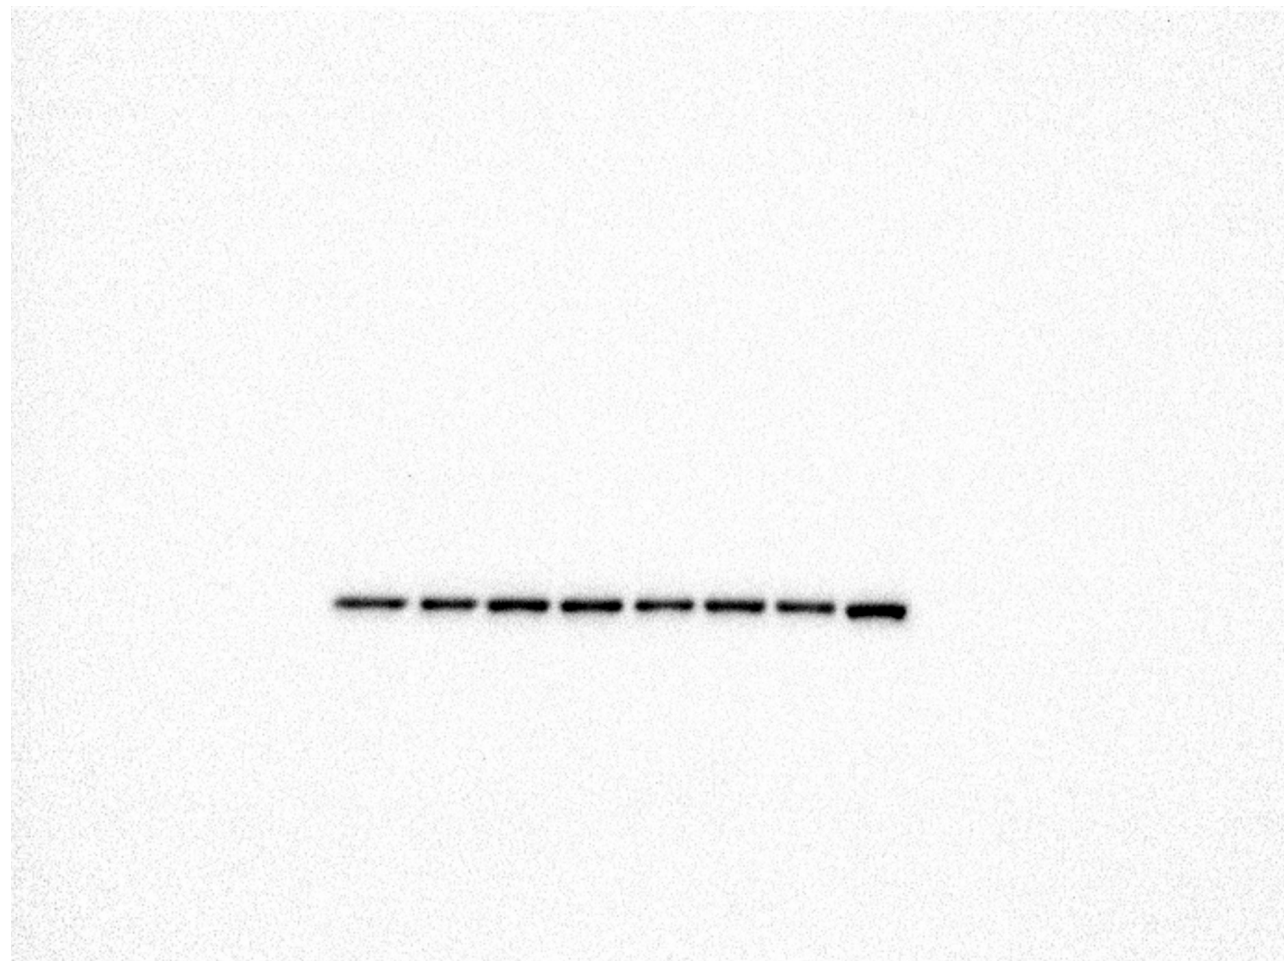

Figure S7c aFLAG

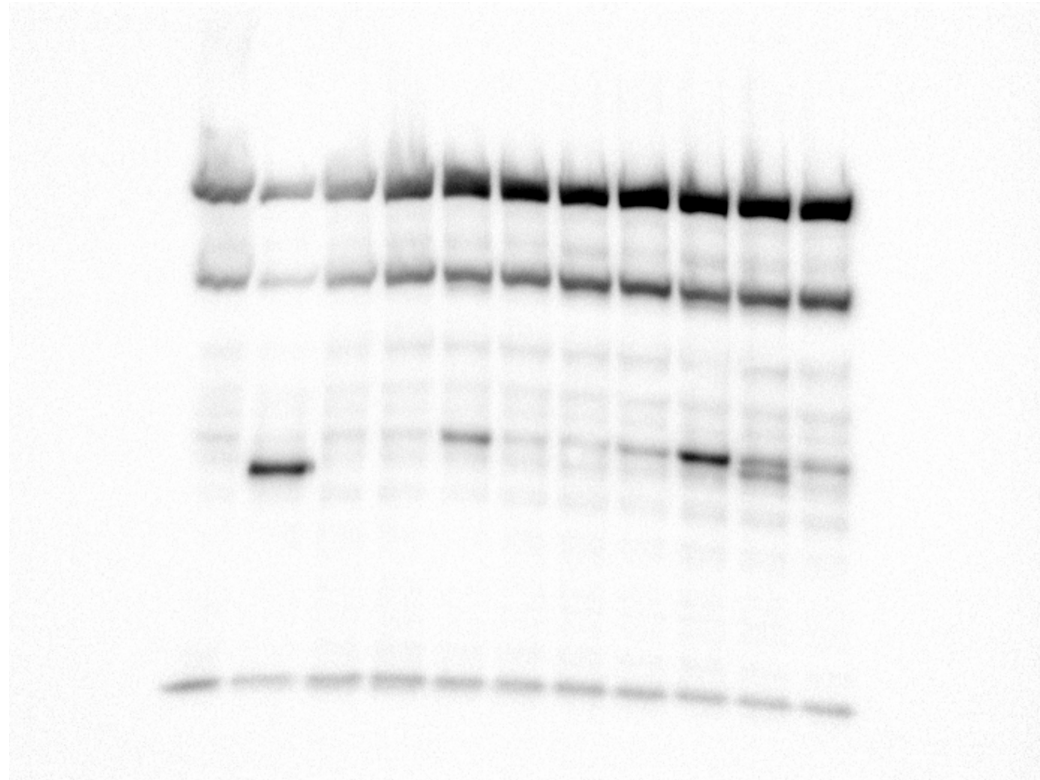

# Figure S7c aHA

low

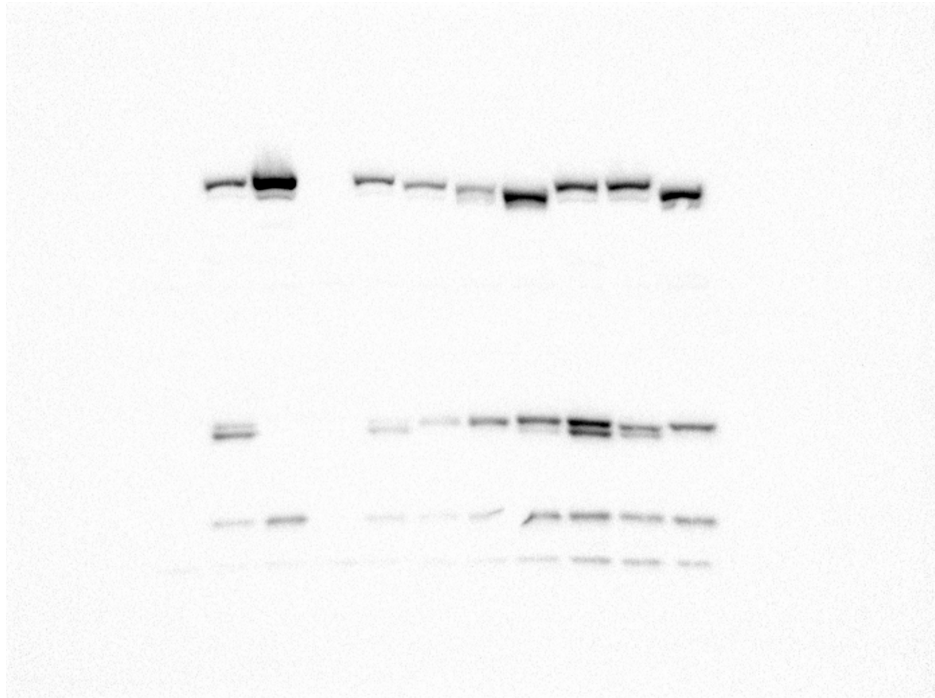

high

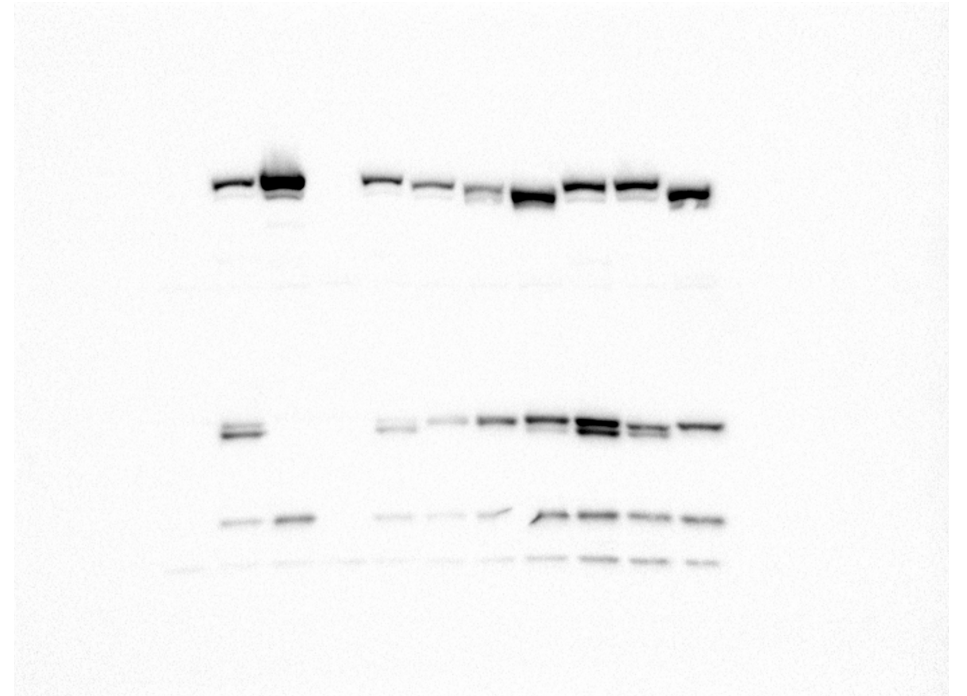

# Figure S7c aGAPDH

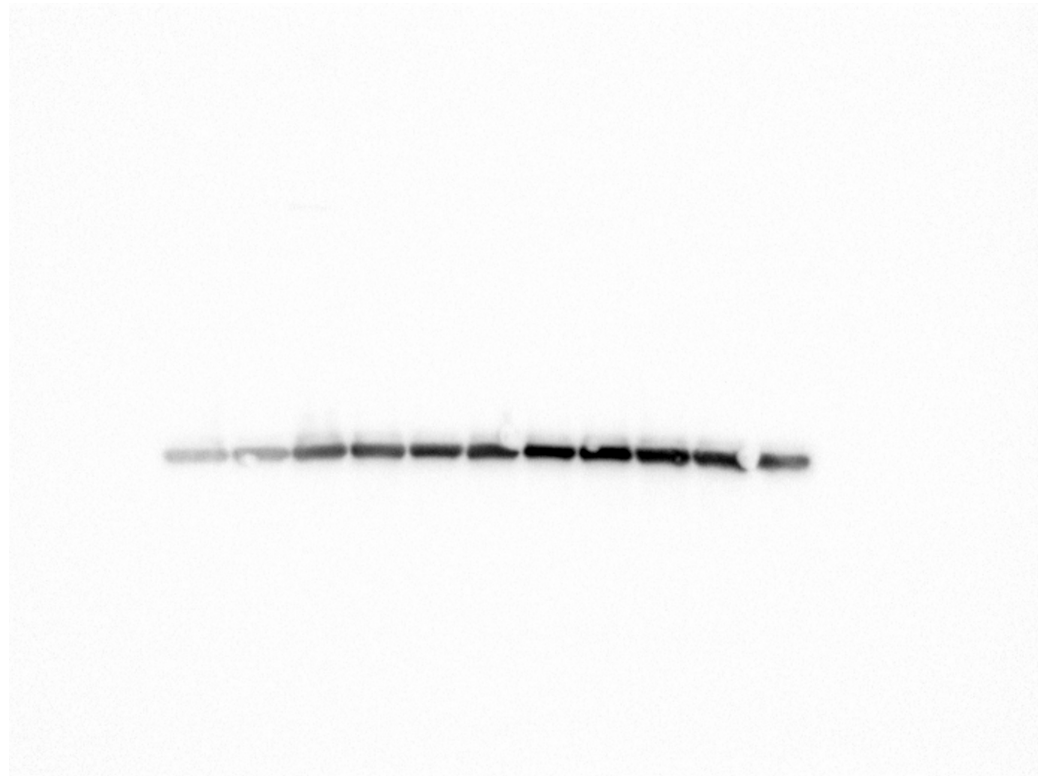

Figure S7d aFLAG

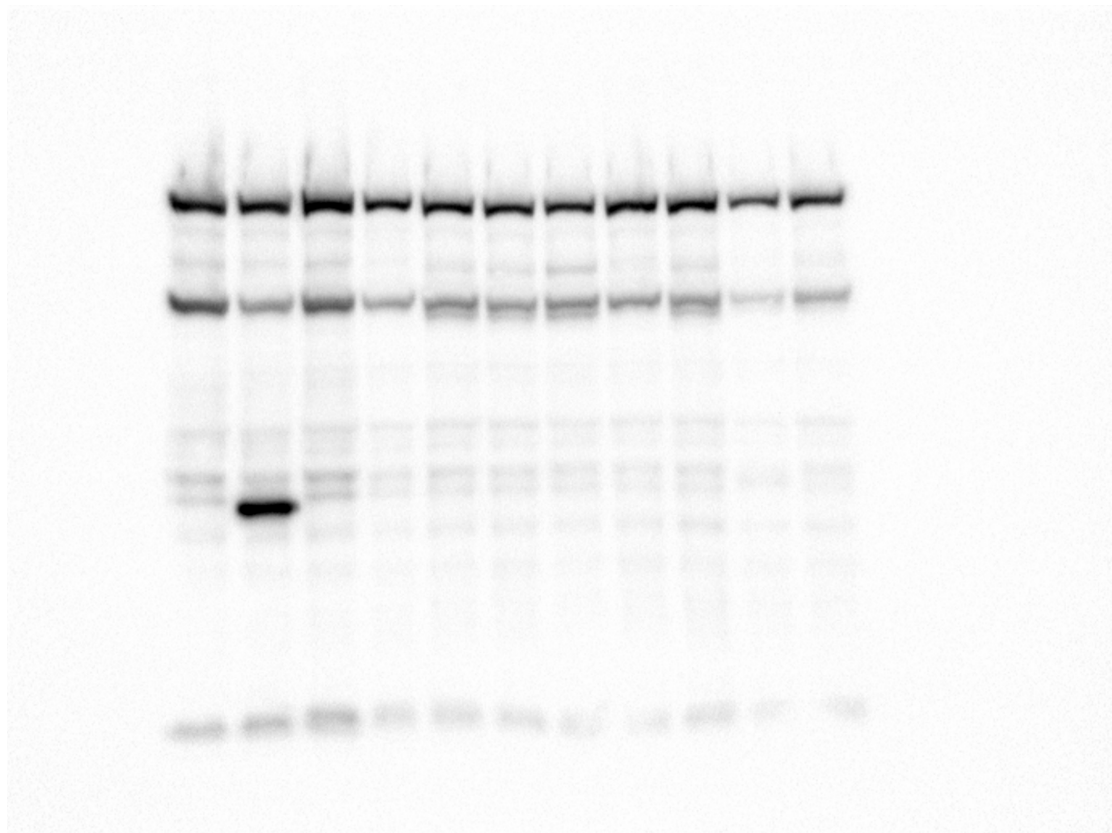

# Figure S7d aHA

low

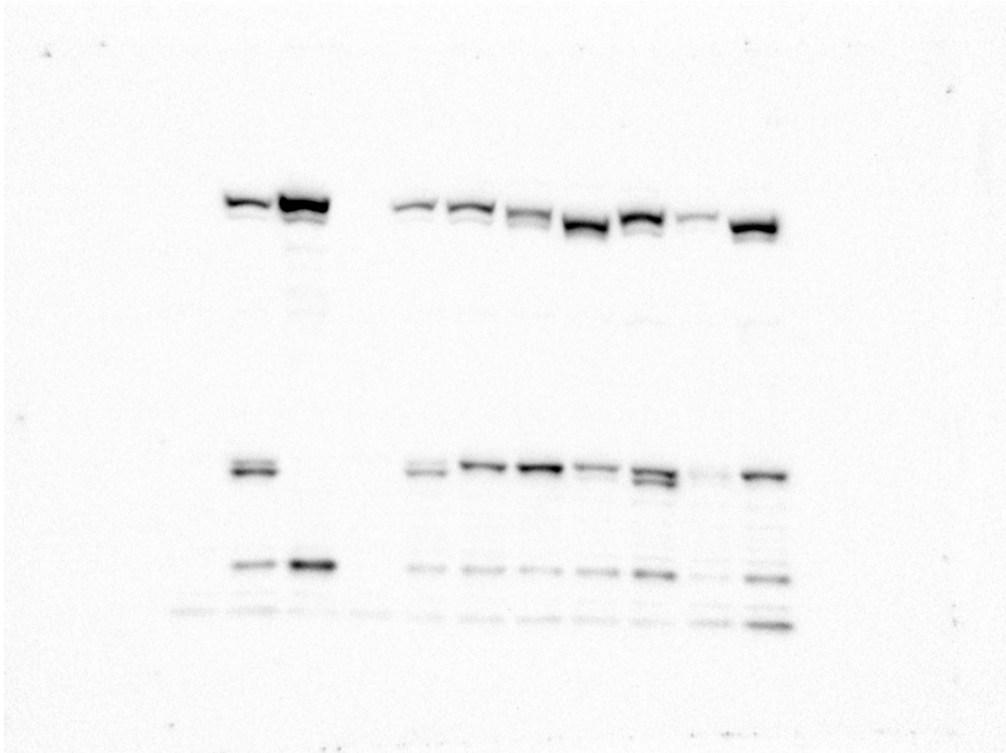

high

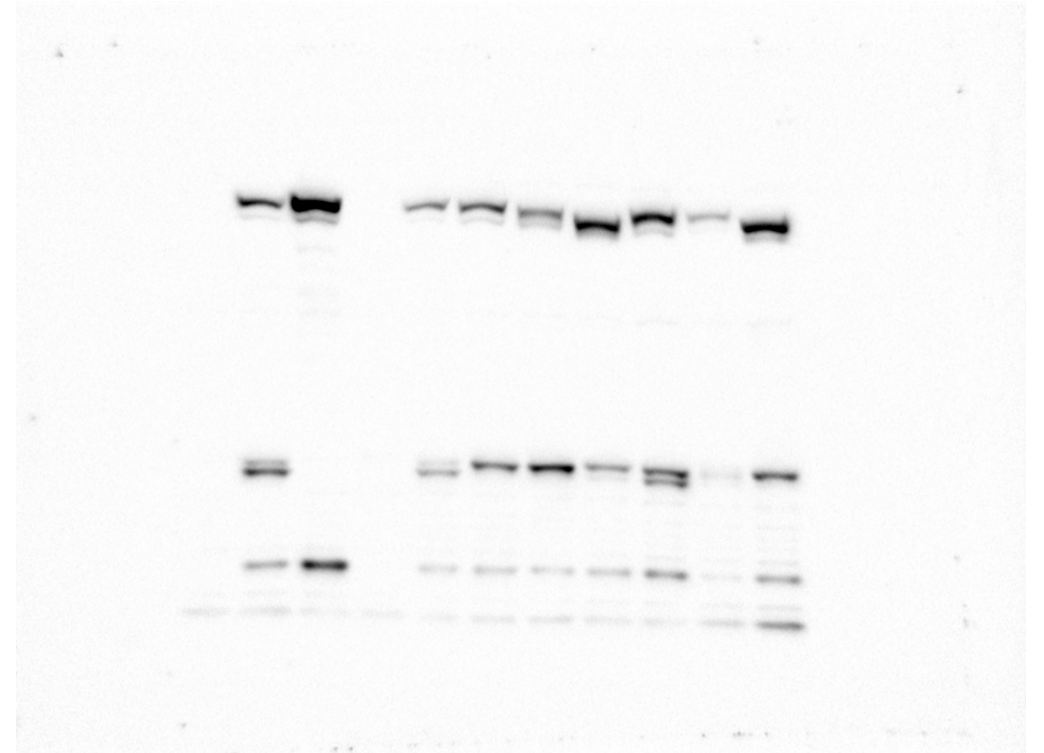



# Figure S7d aGAPDH

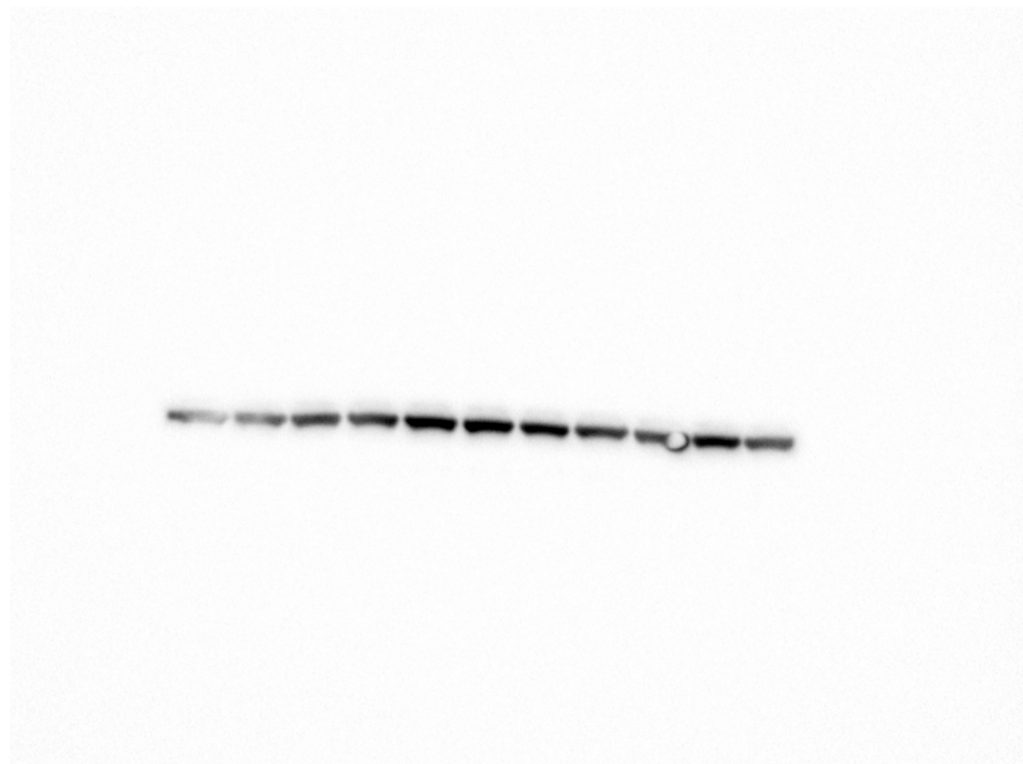

# Figure S8

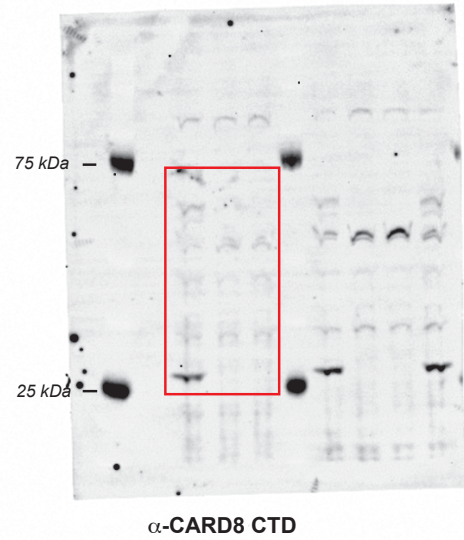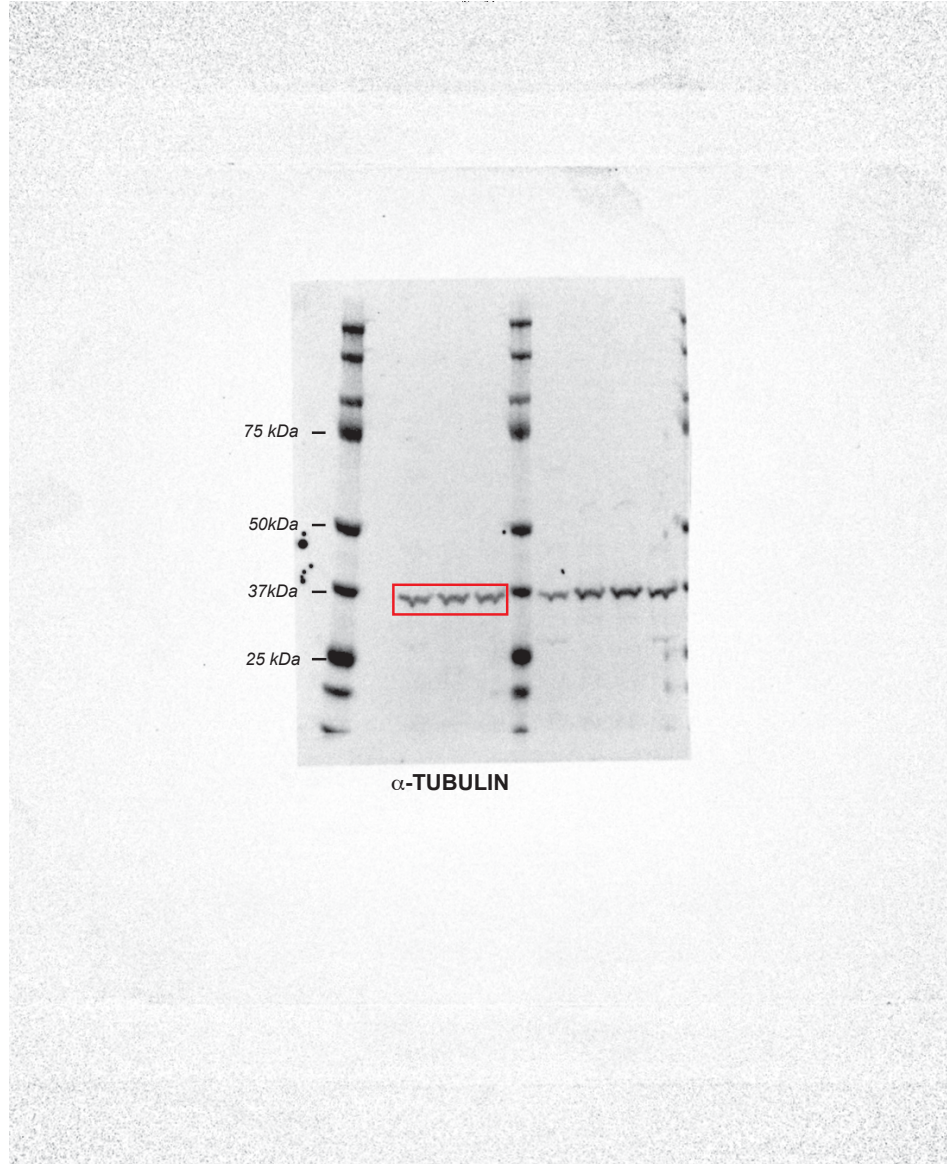

Figure S14a aV5 (top)

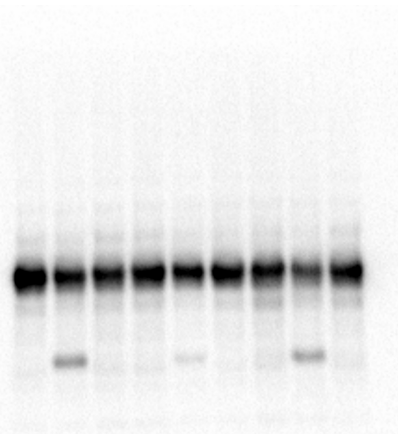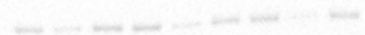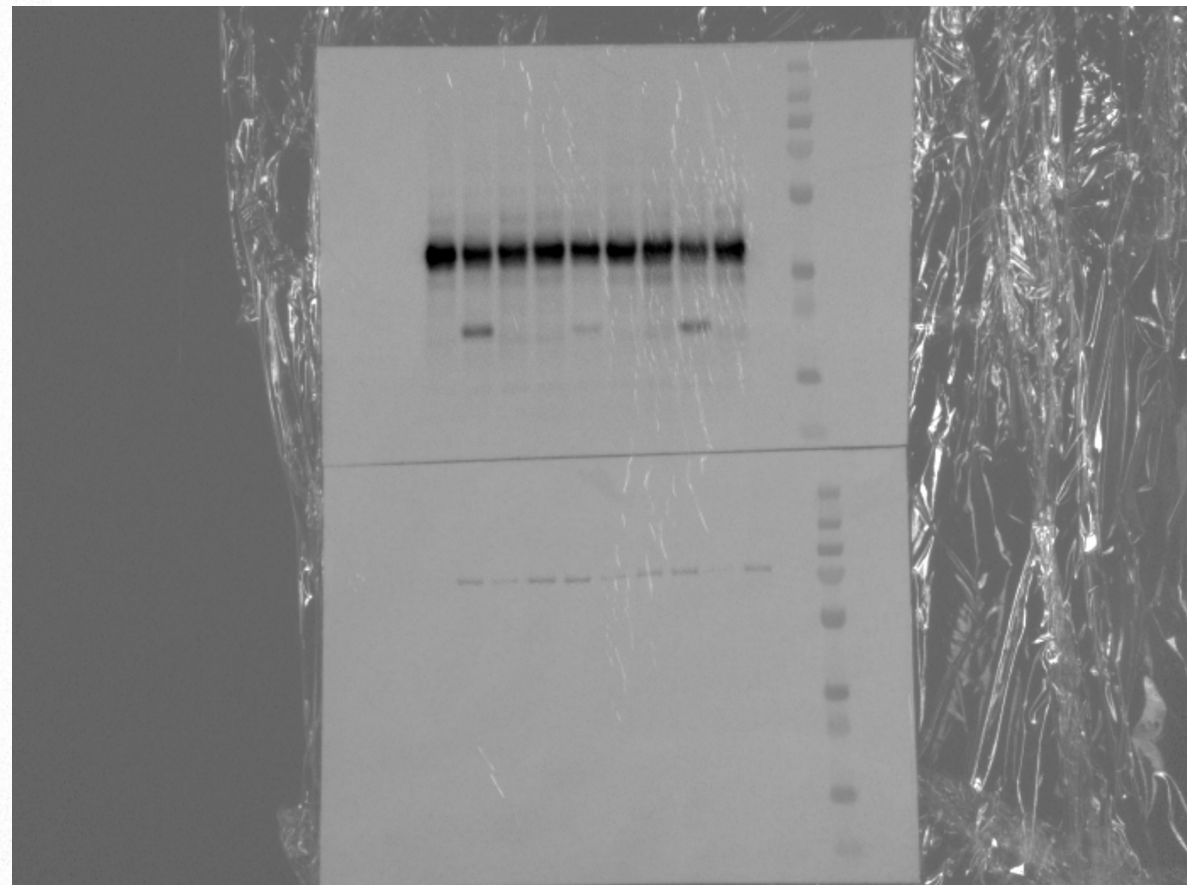

Figure S14a aMyc (bottom half)

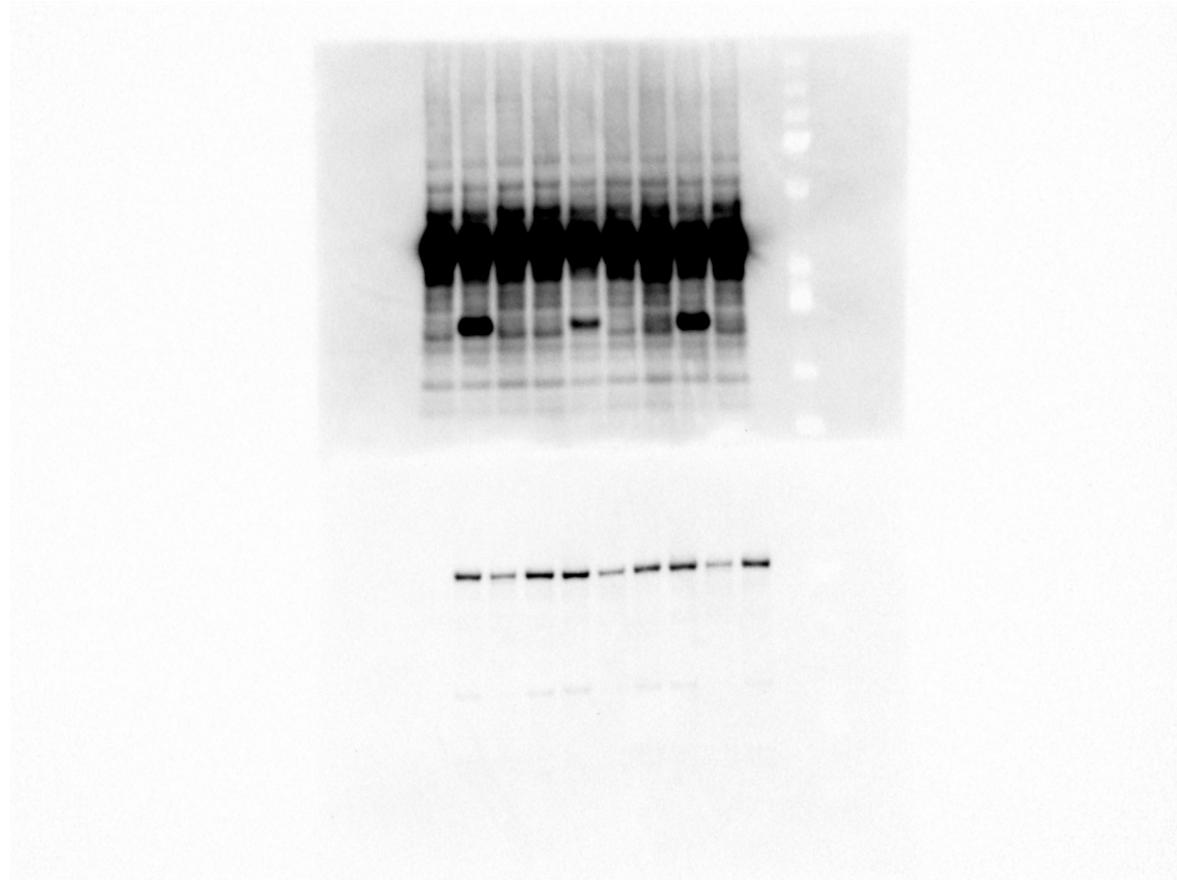

# Figure S14a aHA

low

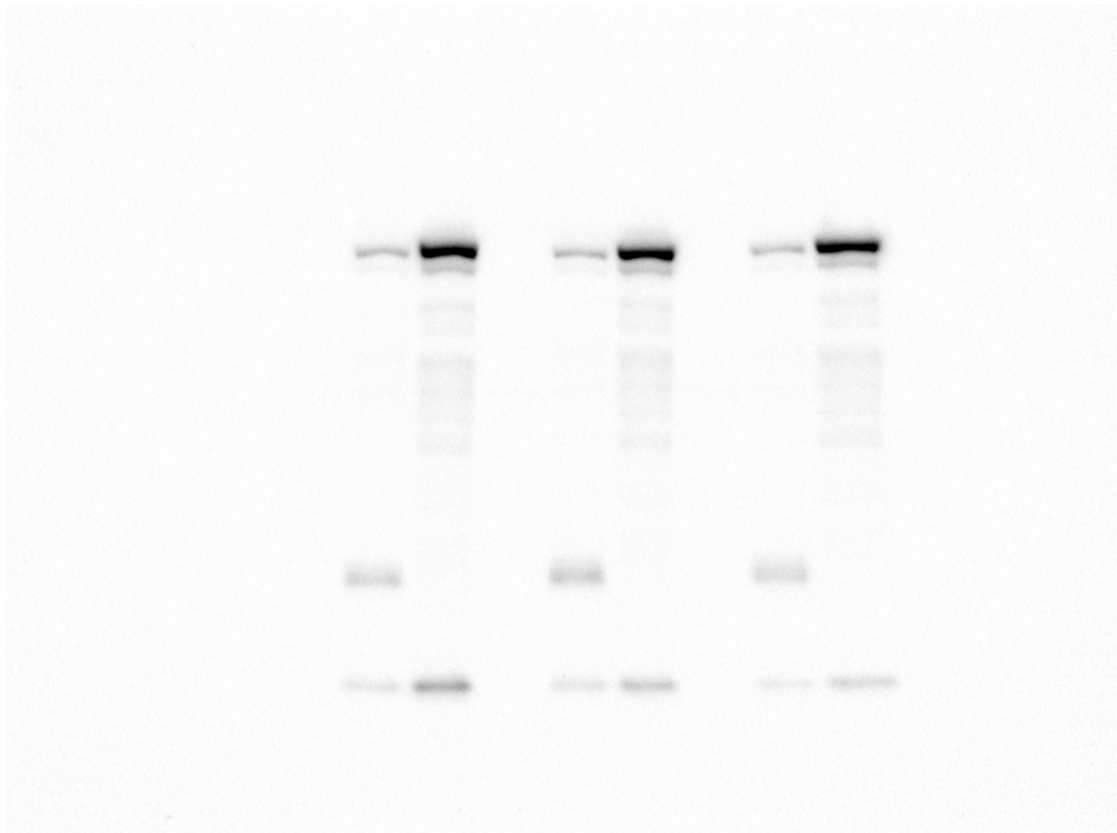

high

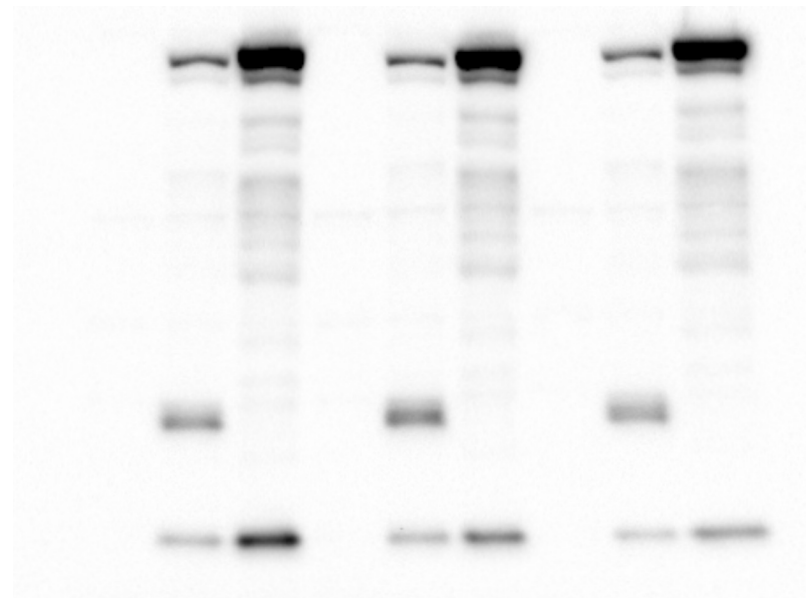

# Figure S14a aGAPDH

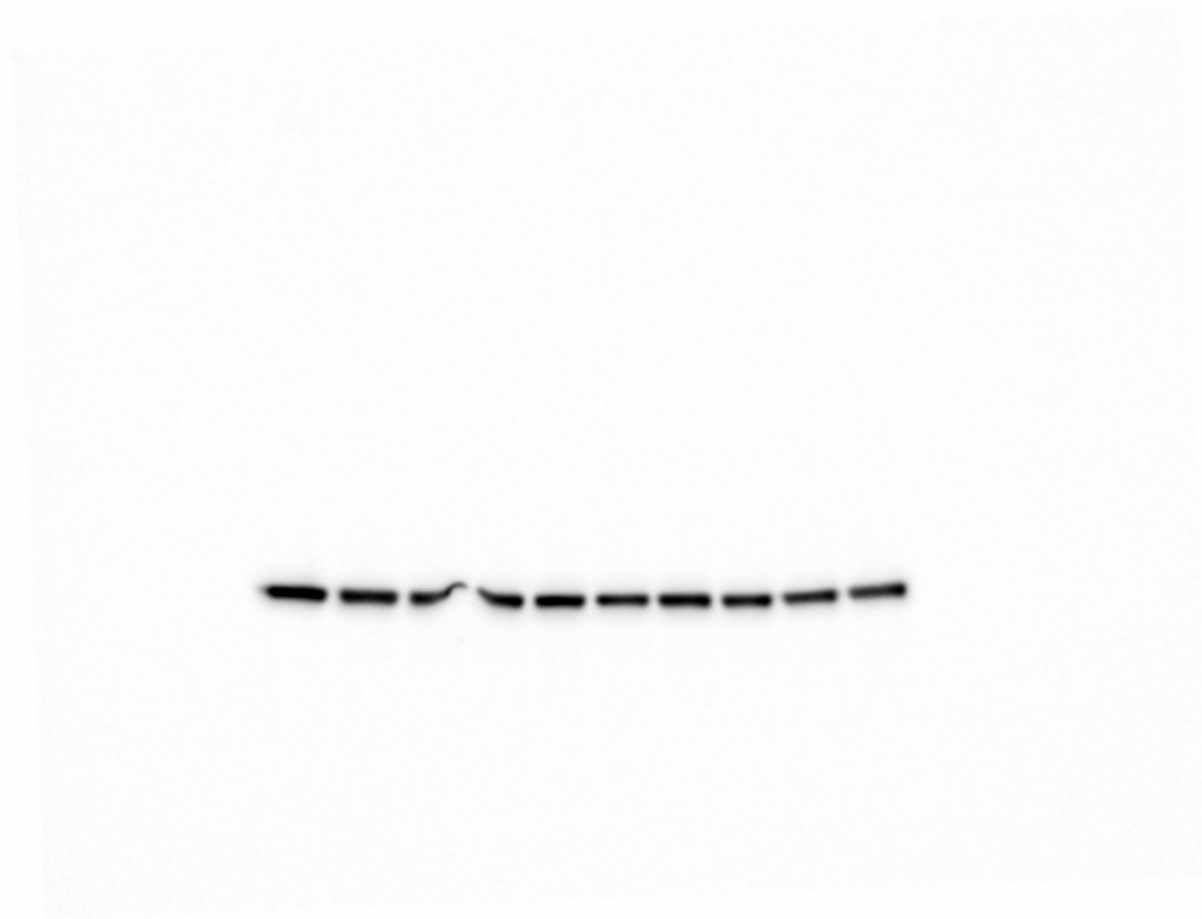

Figure S14b aFLAG

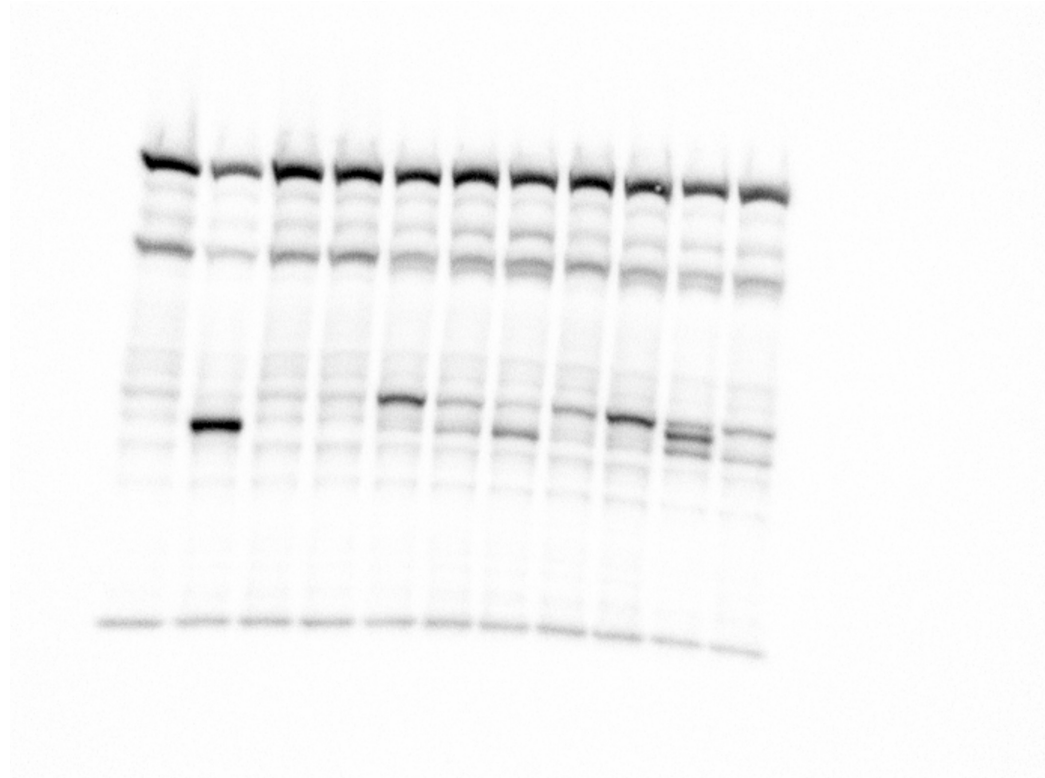

# Figure S14b aHA

low

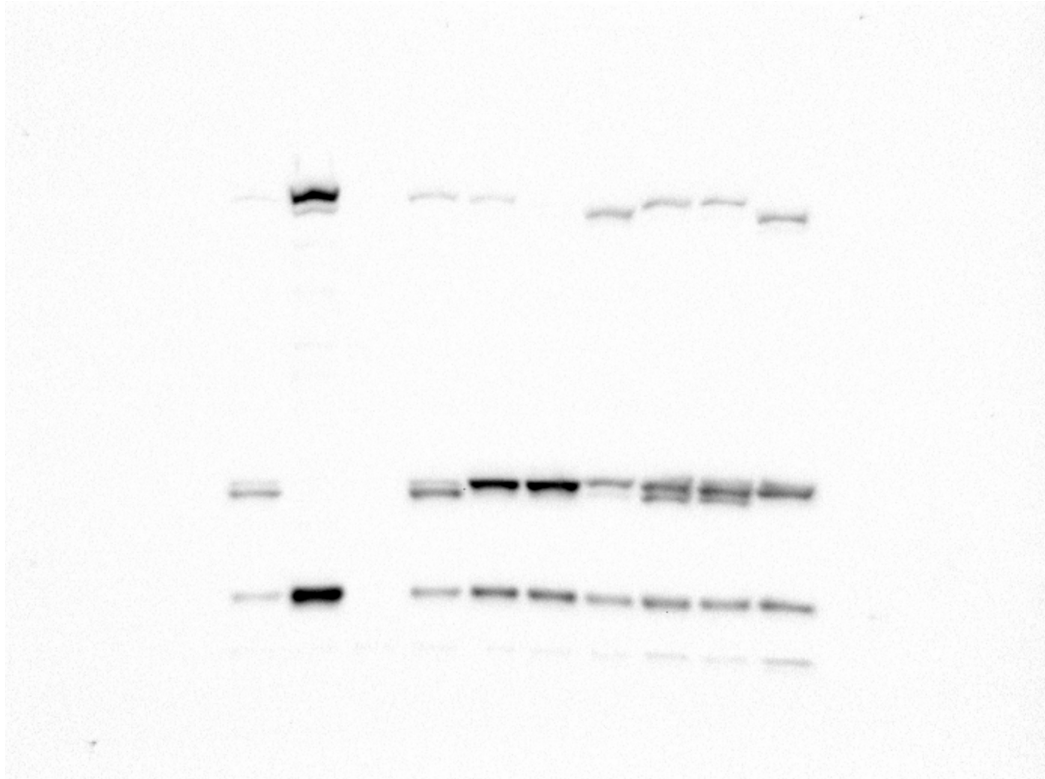

high

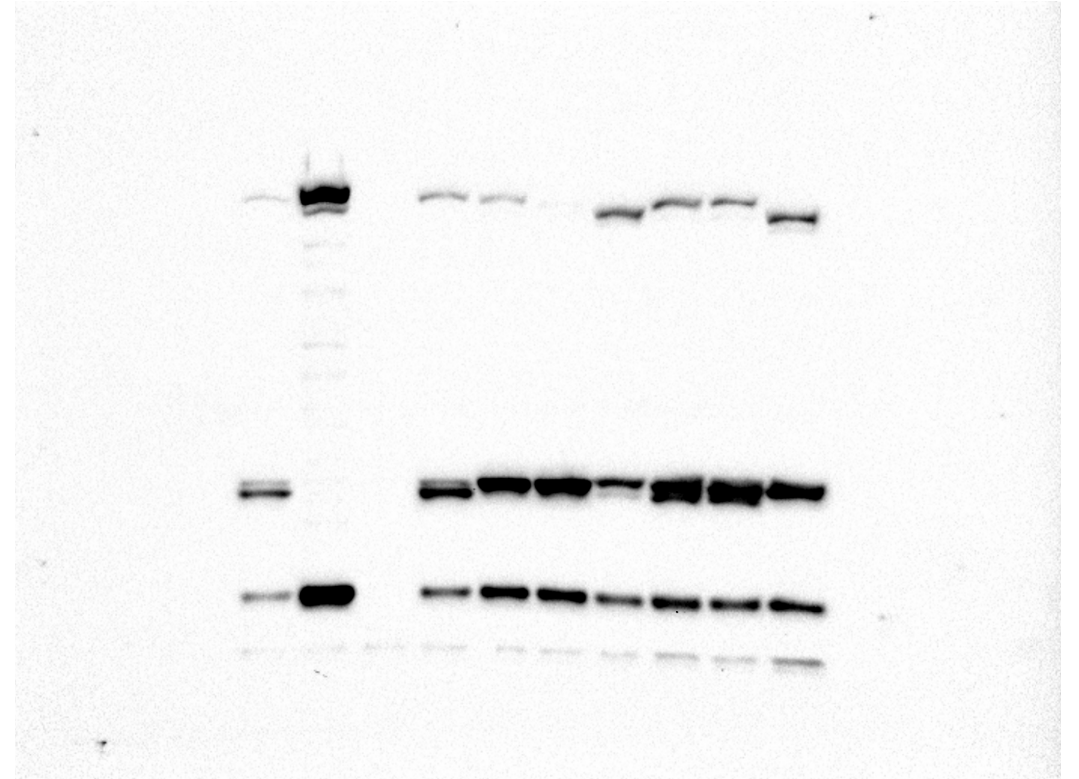



# Figure S14b aGAPDH

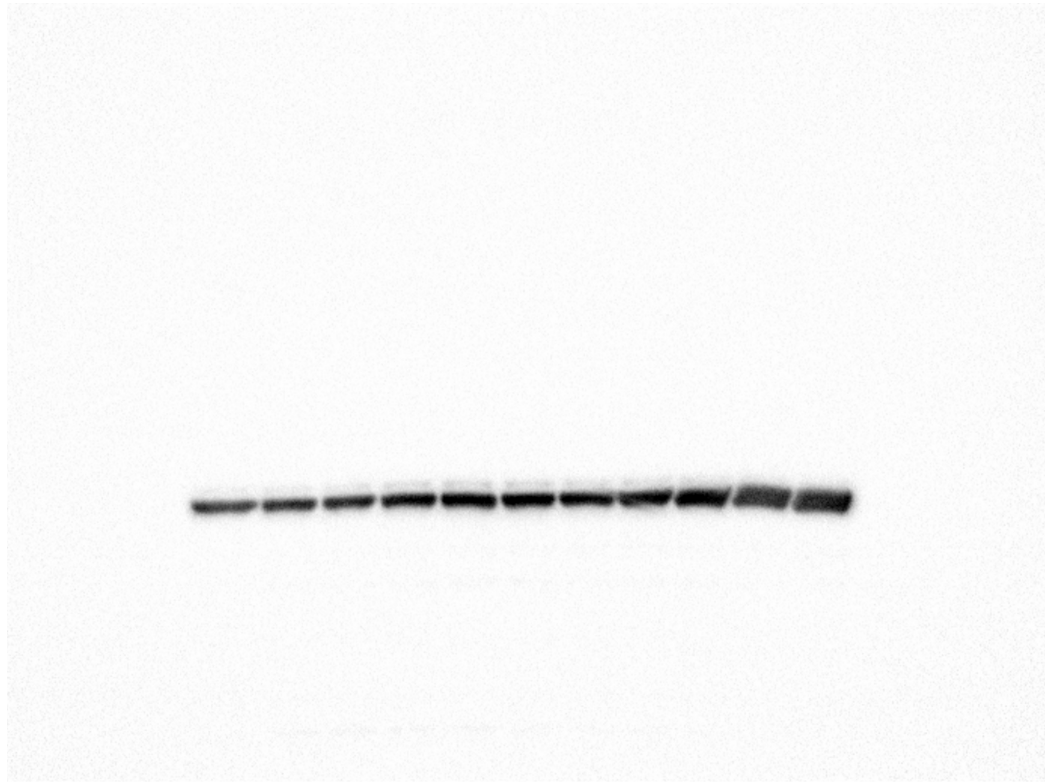

Figure S16a (left) aFLAG

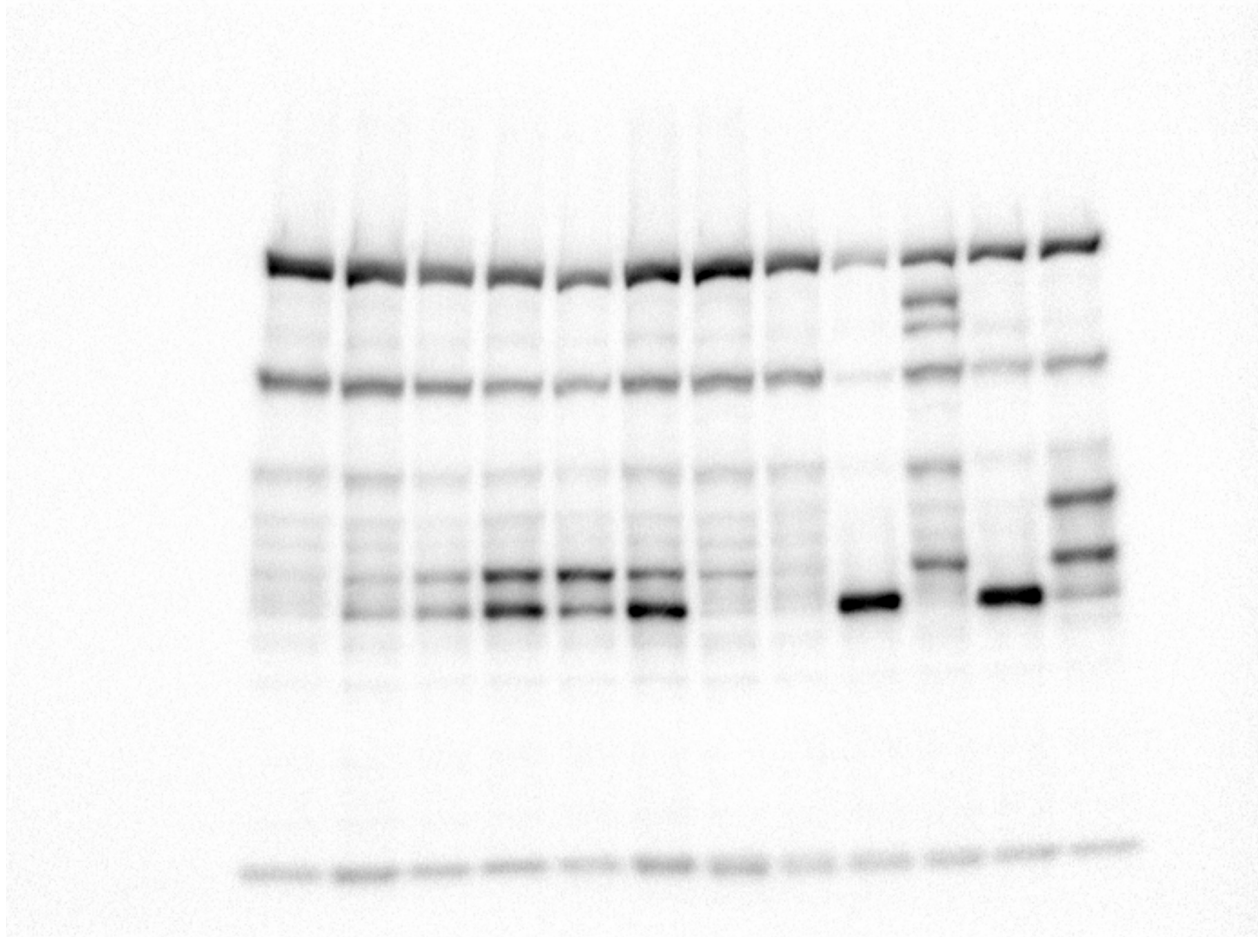

Figure S16a (left) aHA

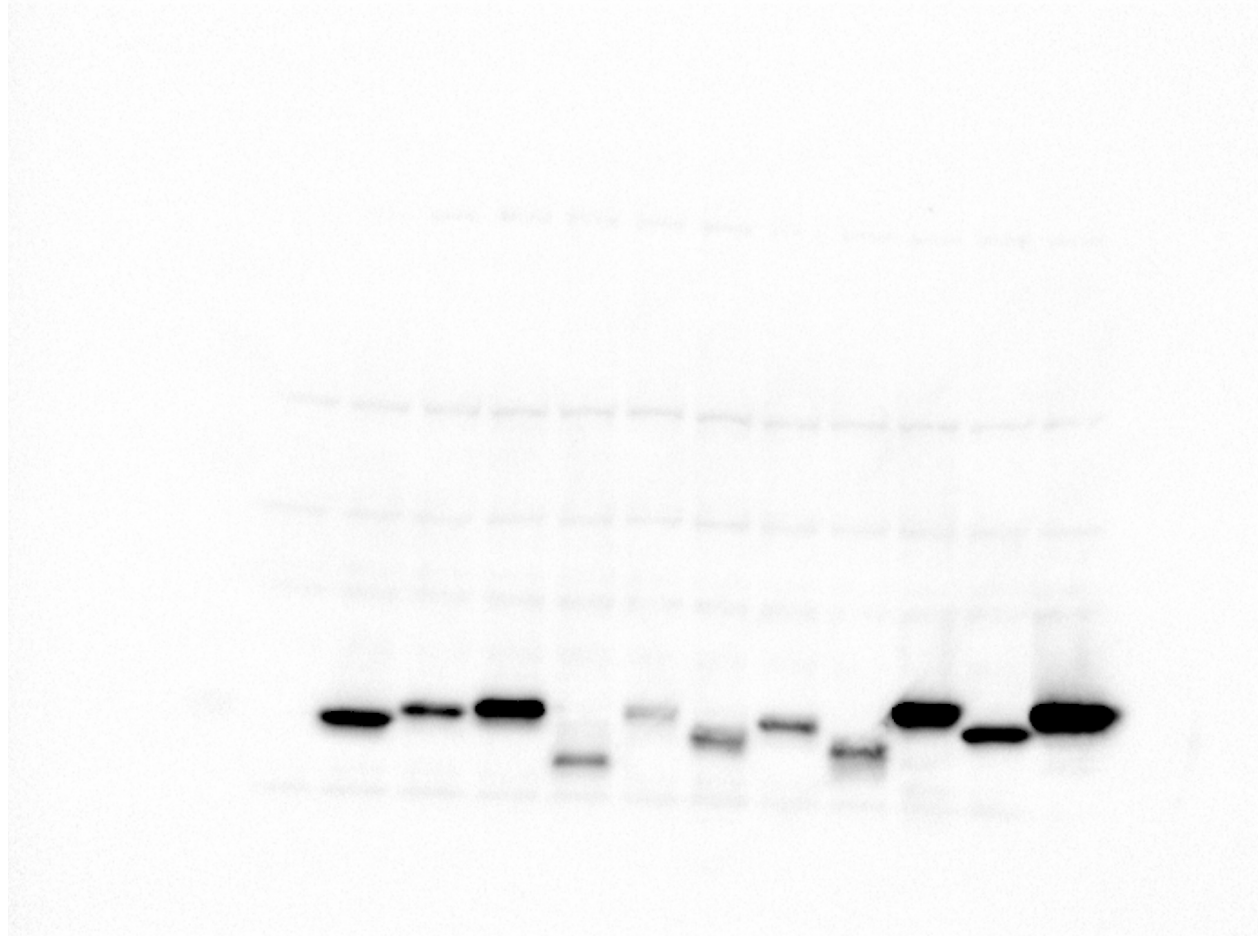

Figure S16a (left) aGAPDH

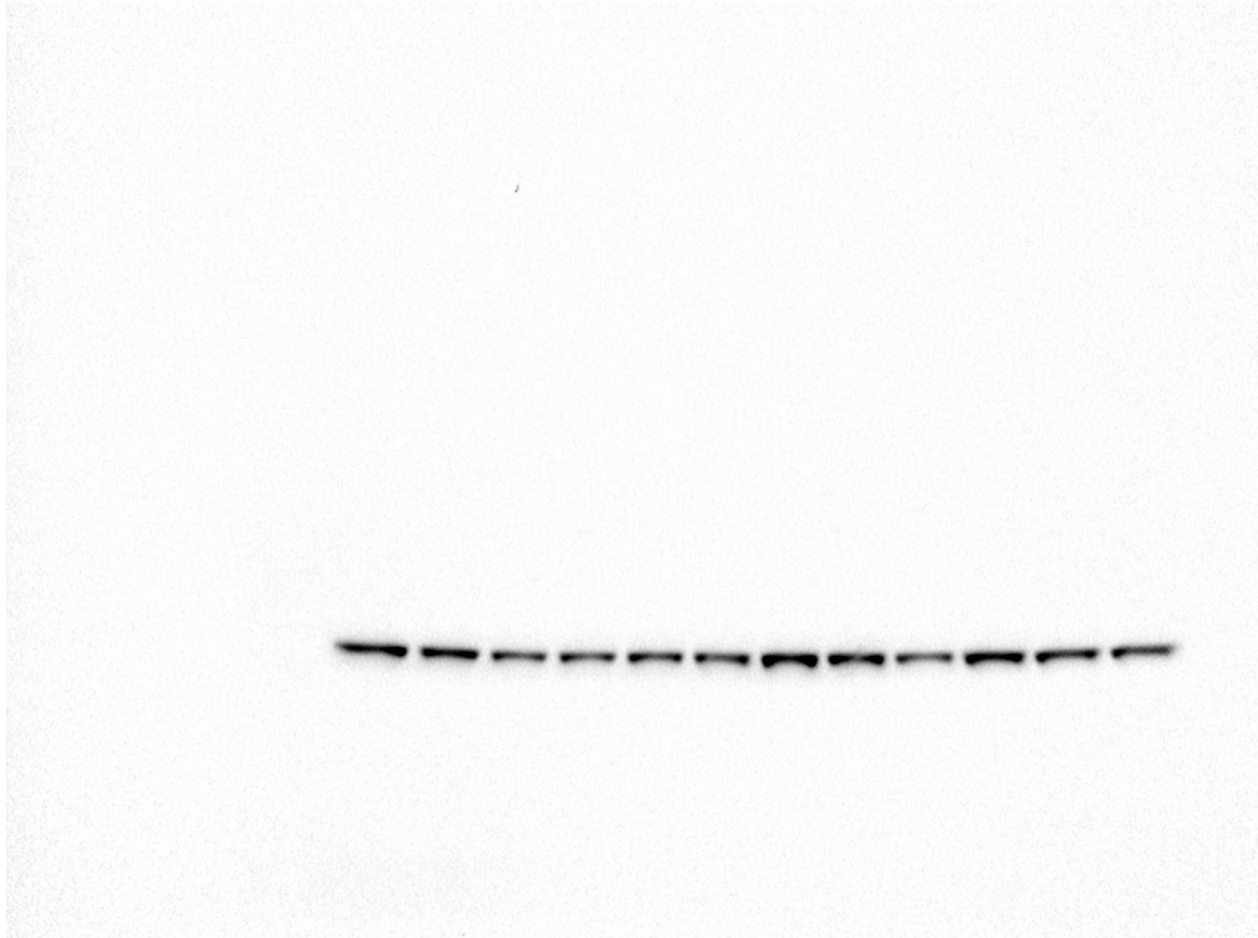

Figure S16a (right) aFLAG

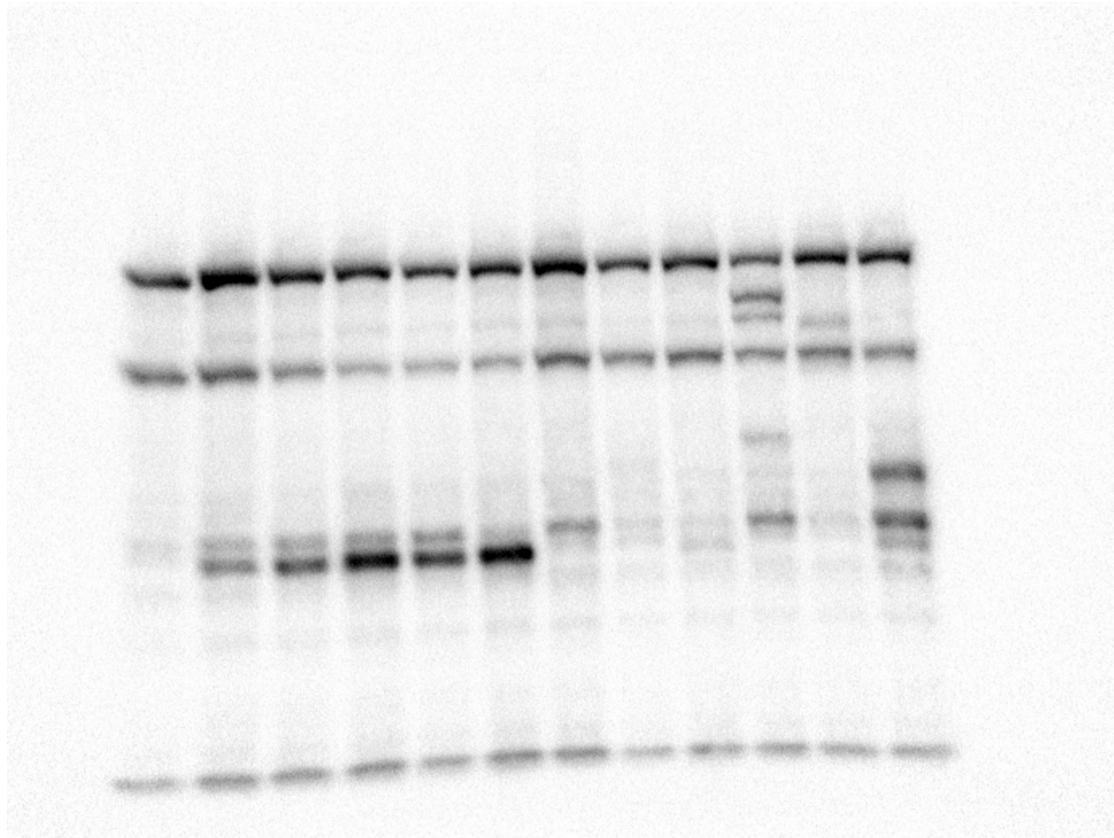

Figure S16a (right) aHA

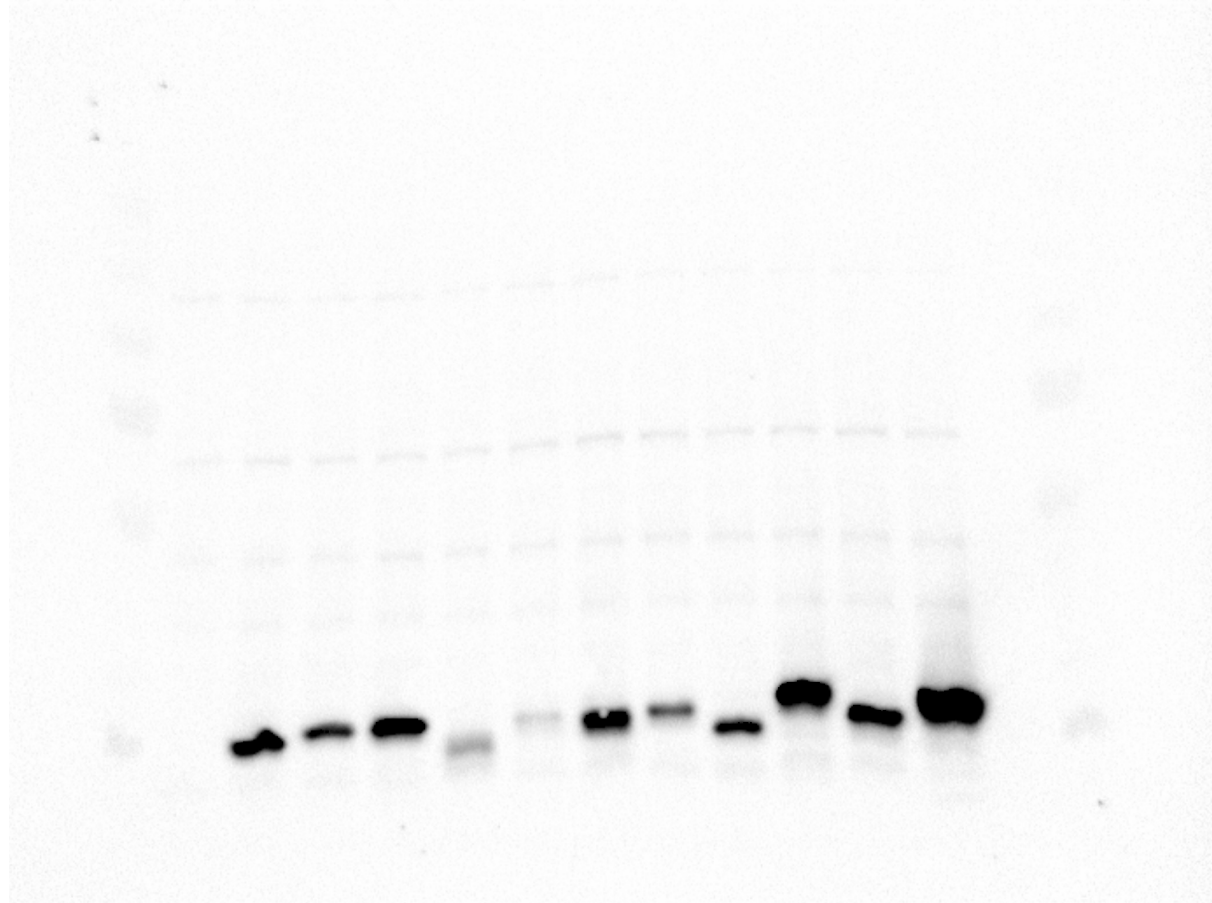

# Figure S16a (right) aGAPDH

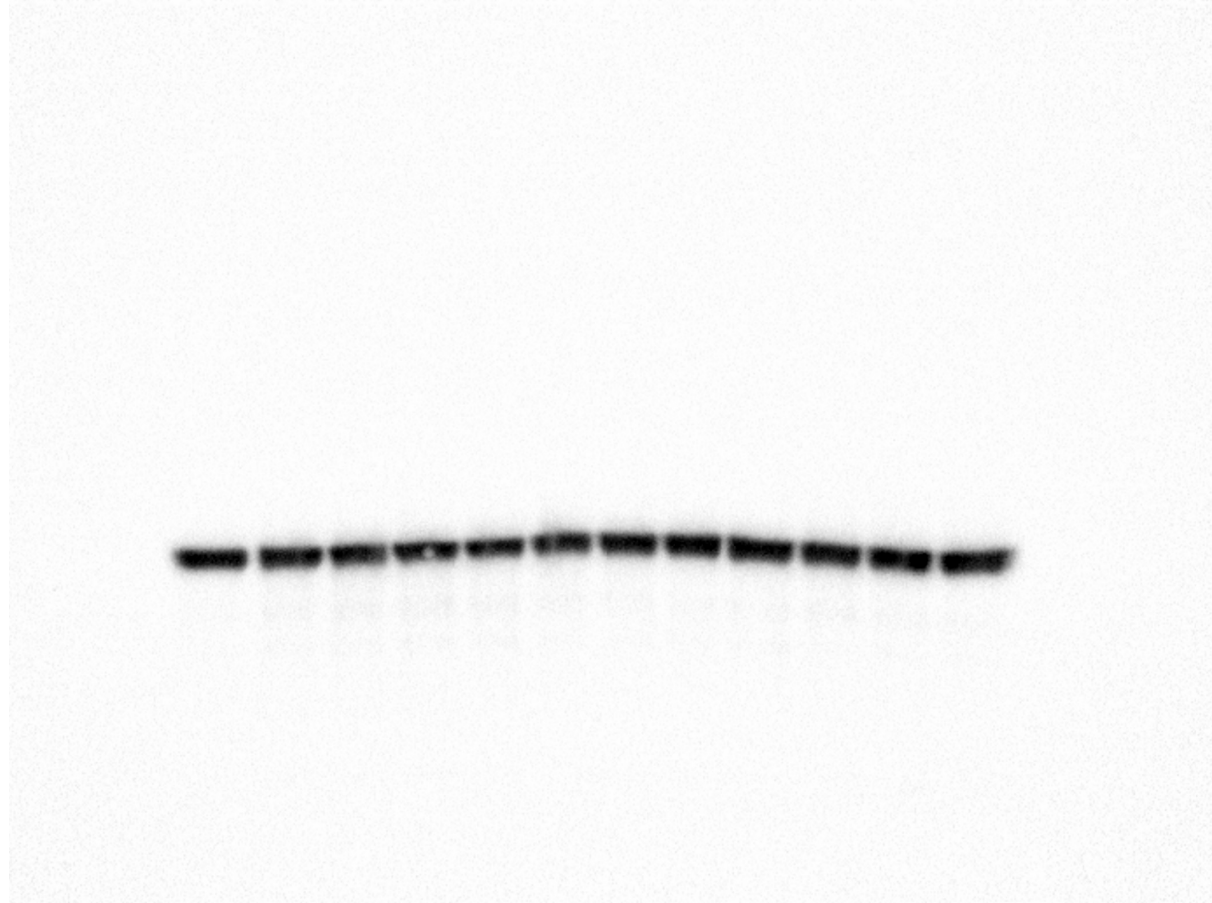

Figure S16b (left) aV5

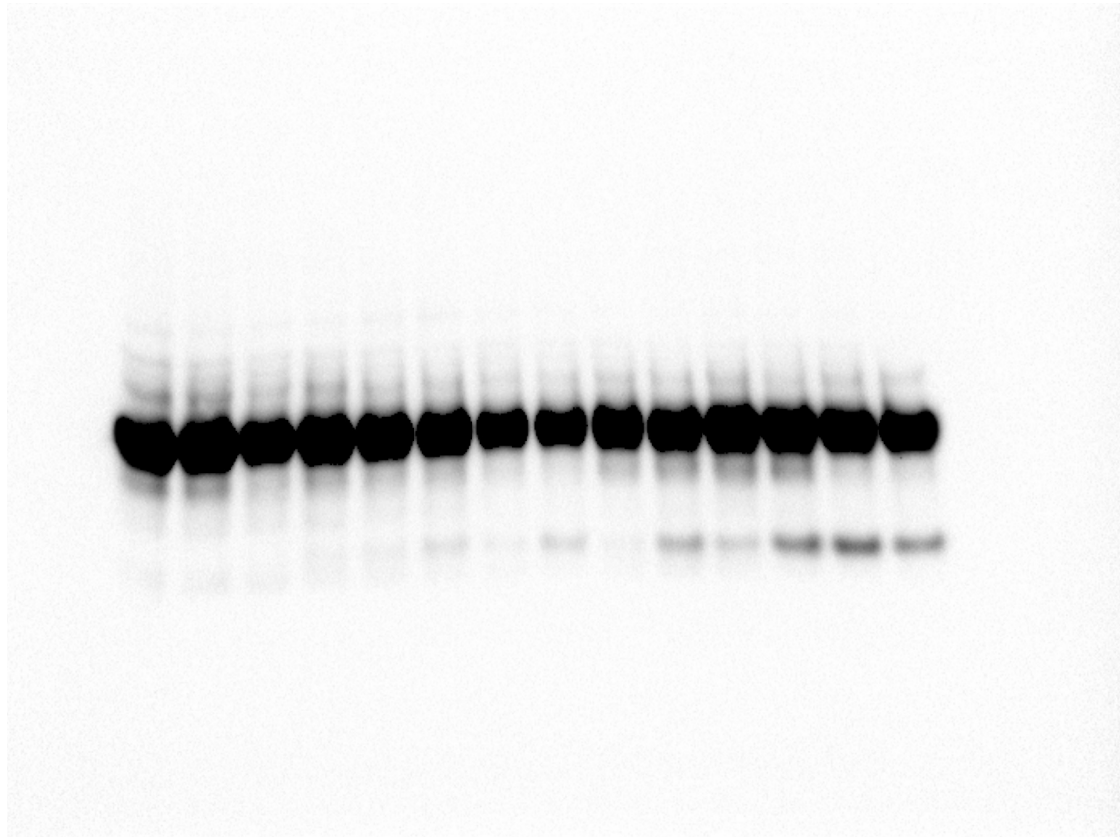



Figure S16b (left) aMyc

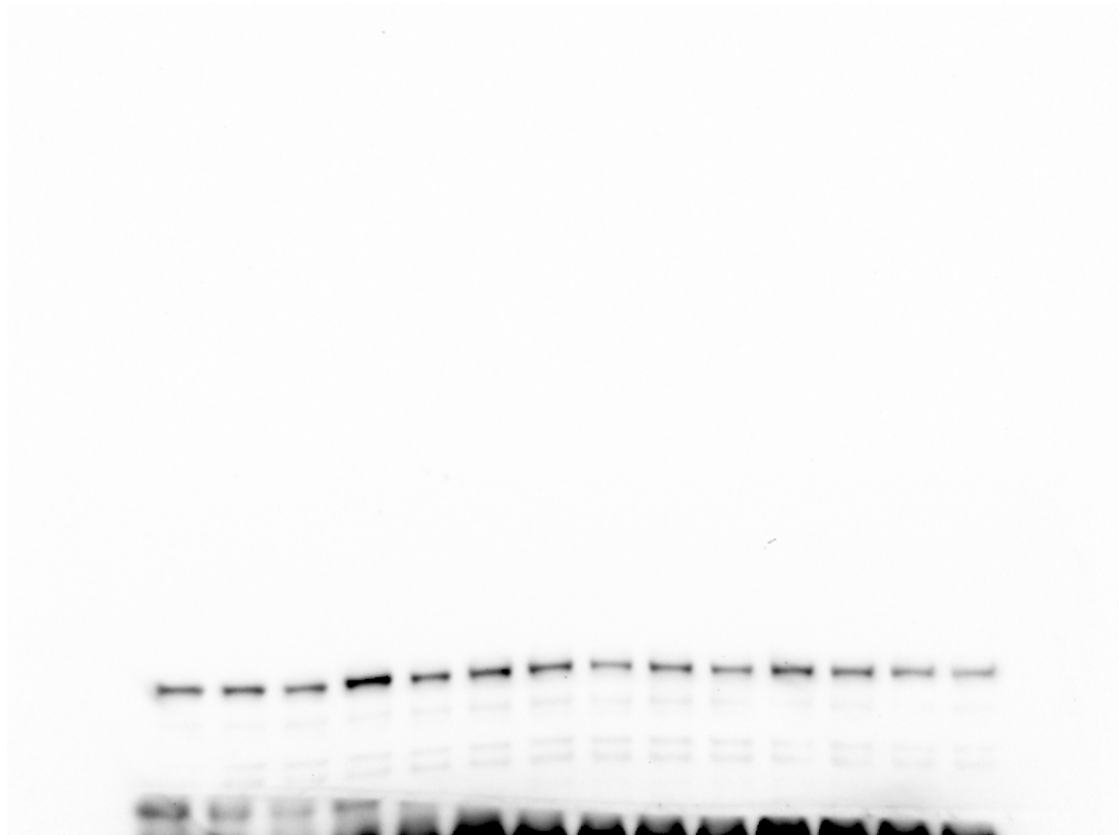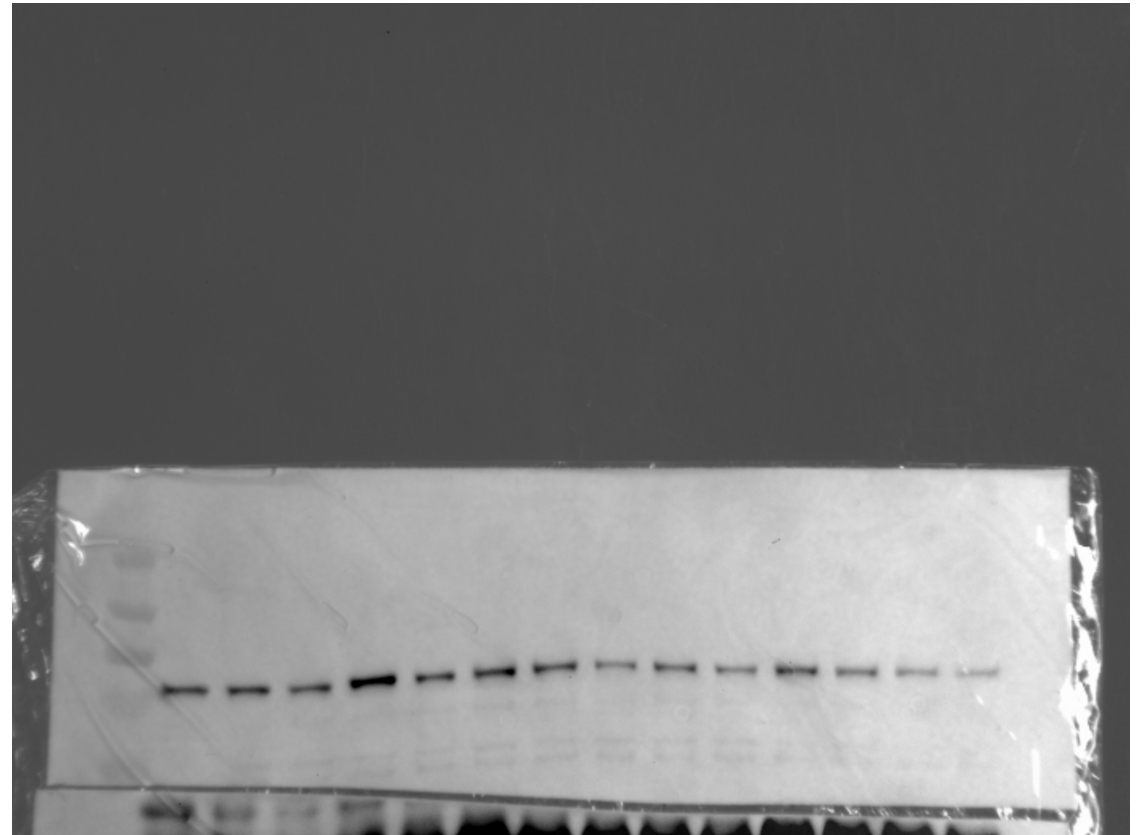

Figure S16b (left) aHA

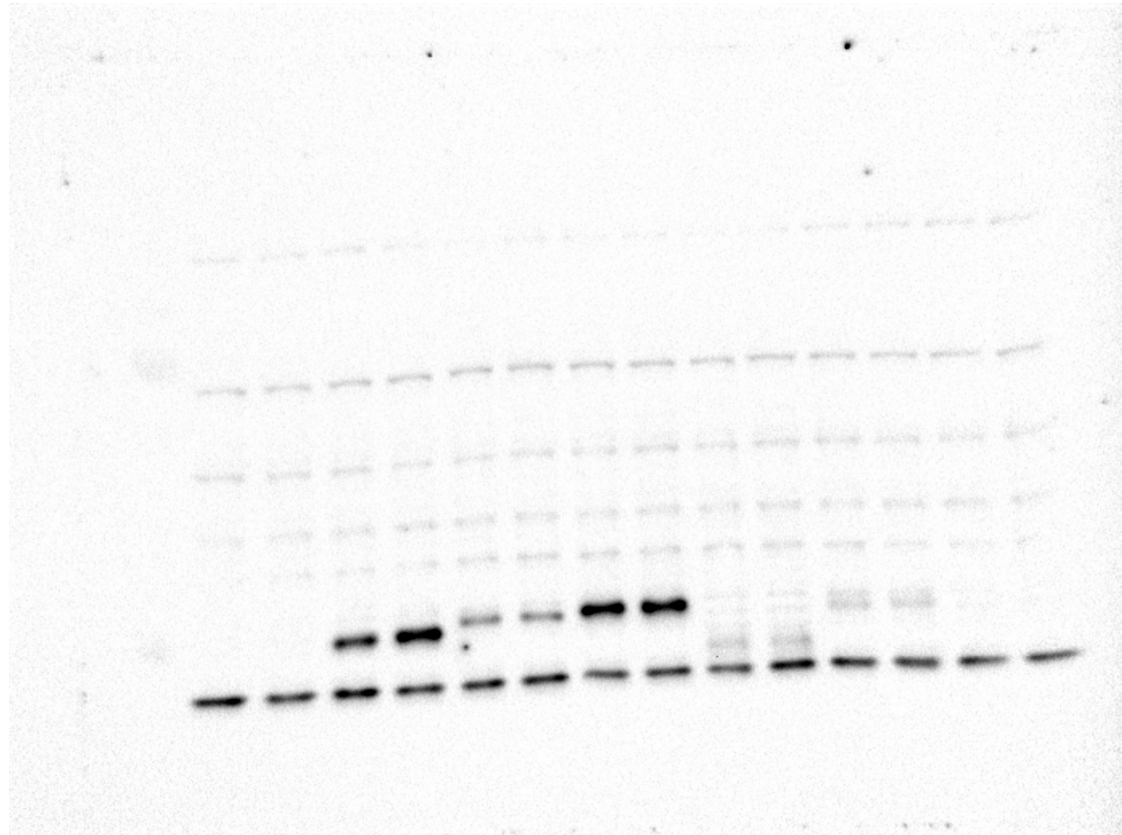

Figure S16b (left) aGAPDH

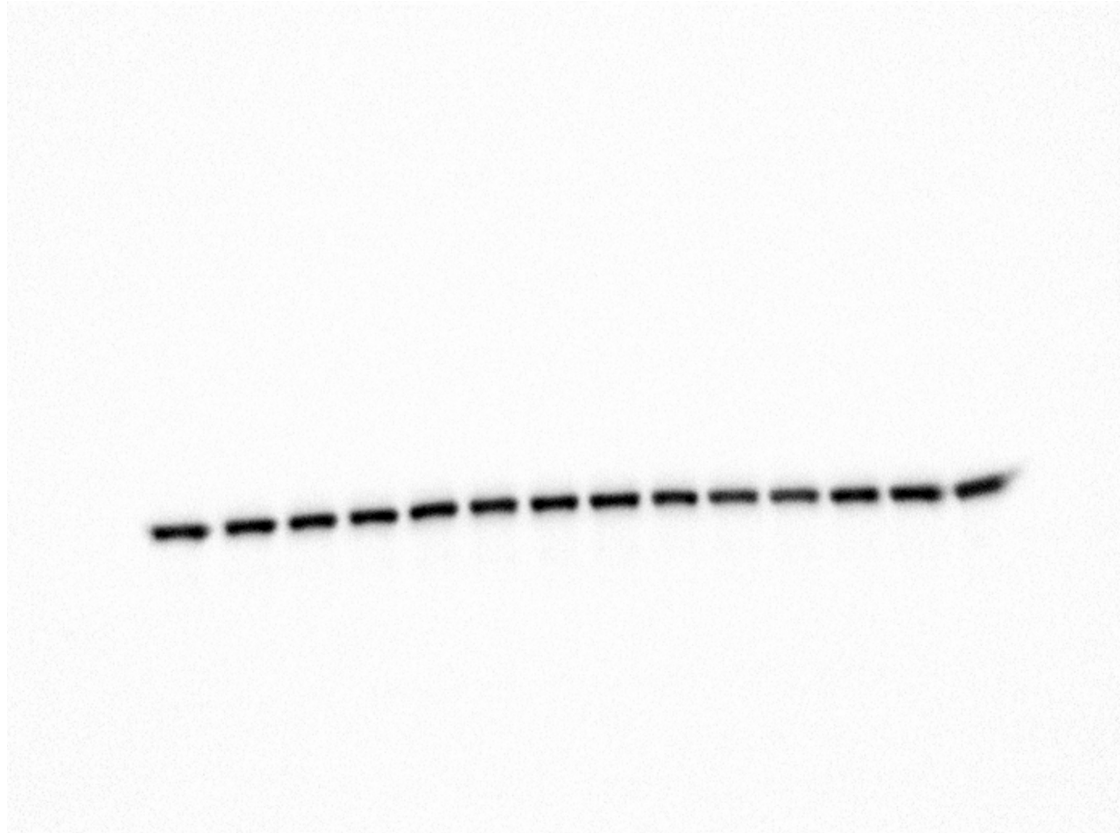

Figure S16b (right) aV5

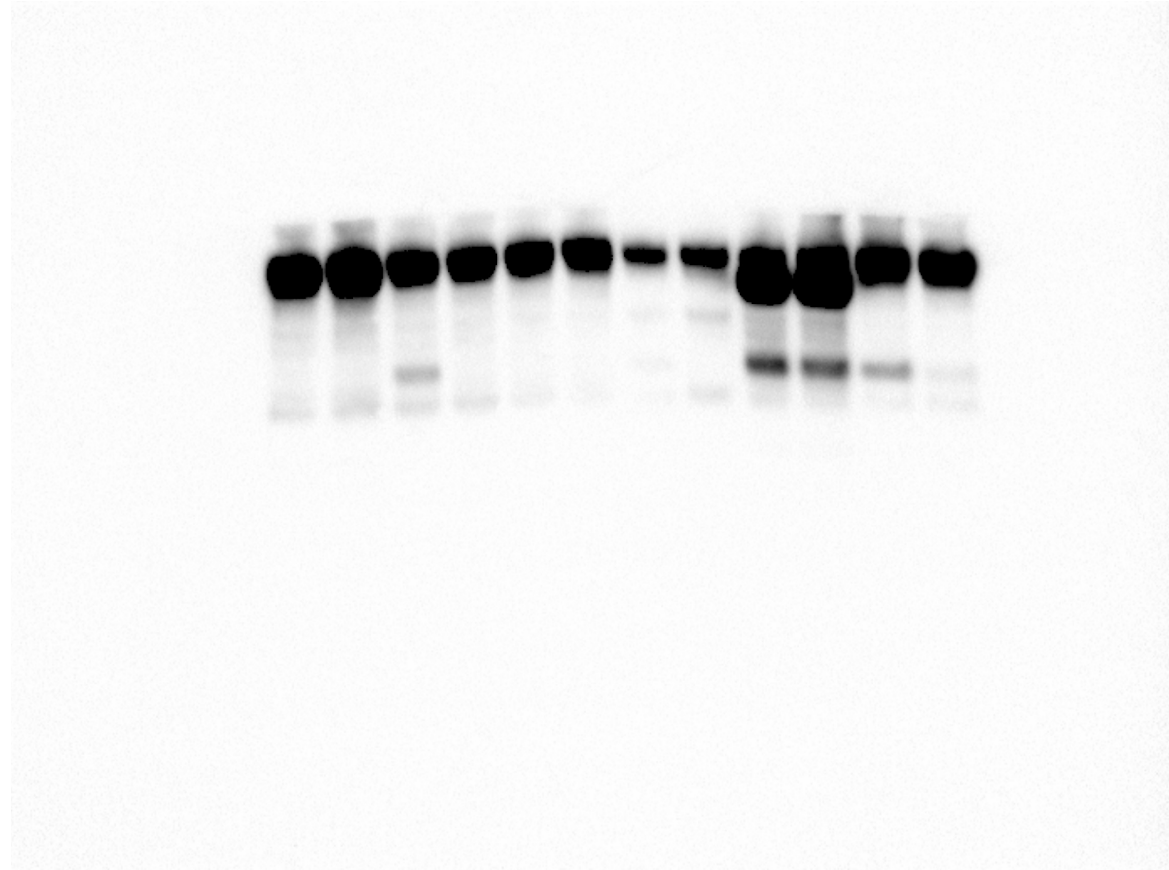

Figure S16b (right) aMyc

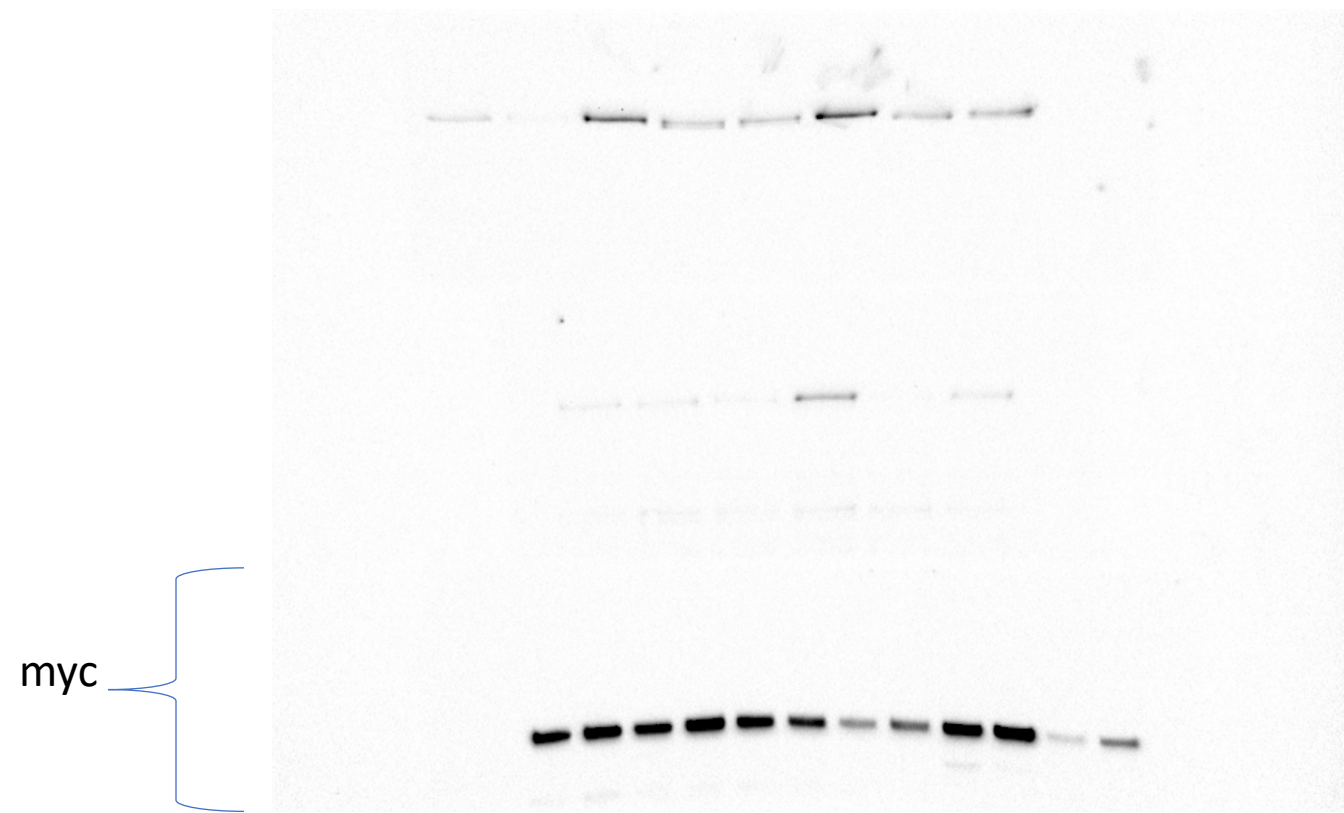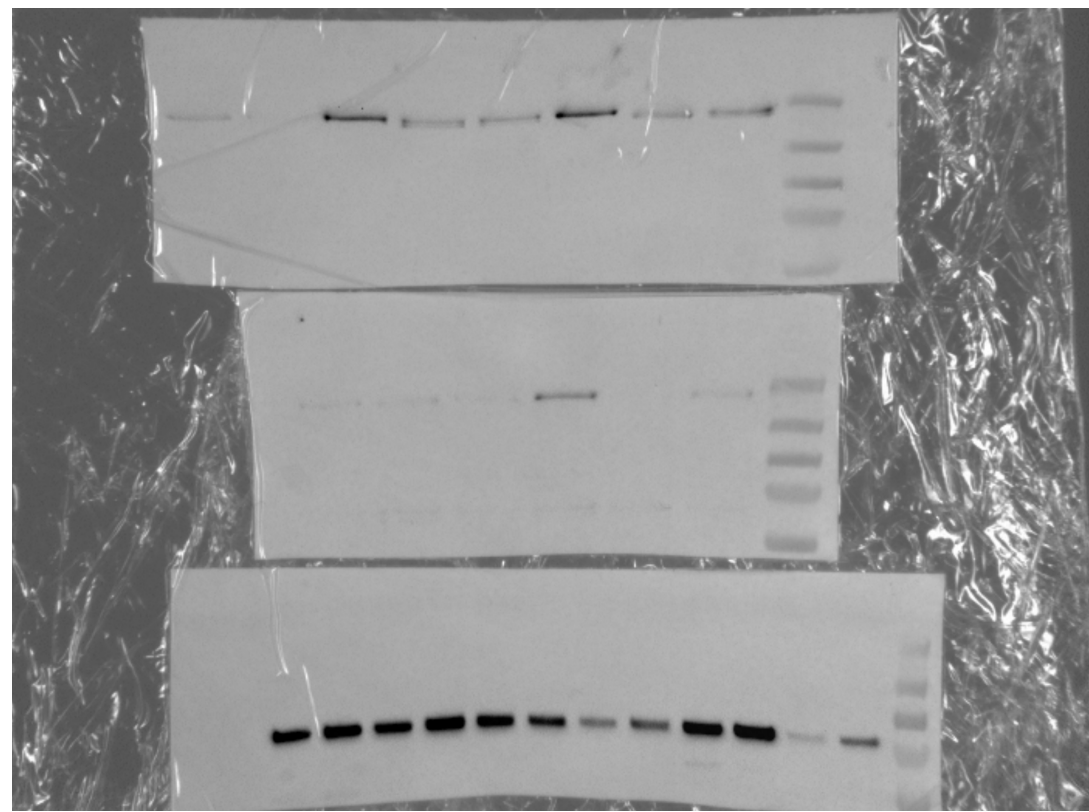

Figure S16b (right) aHA

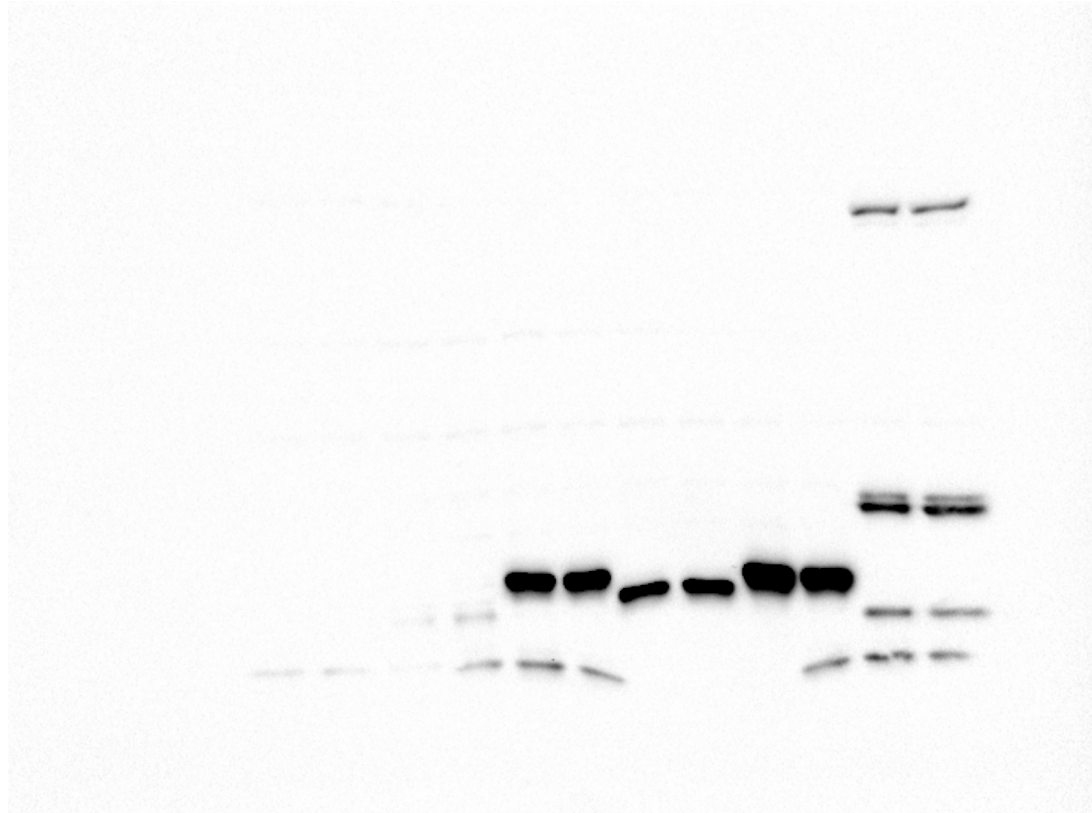

# Figure S16b (right) aGAPDH

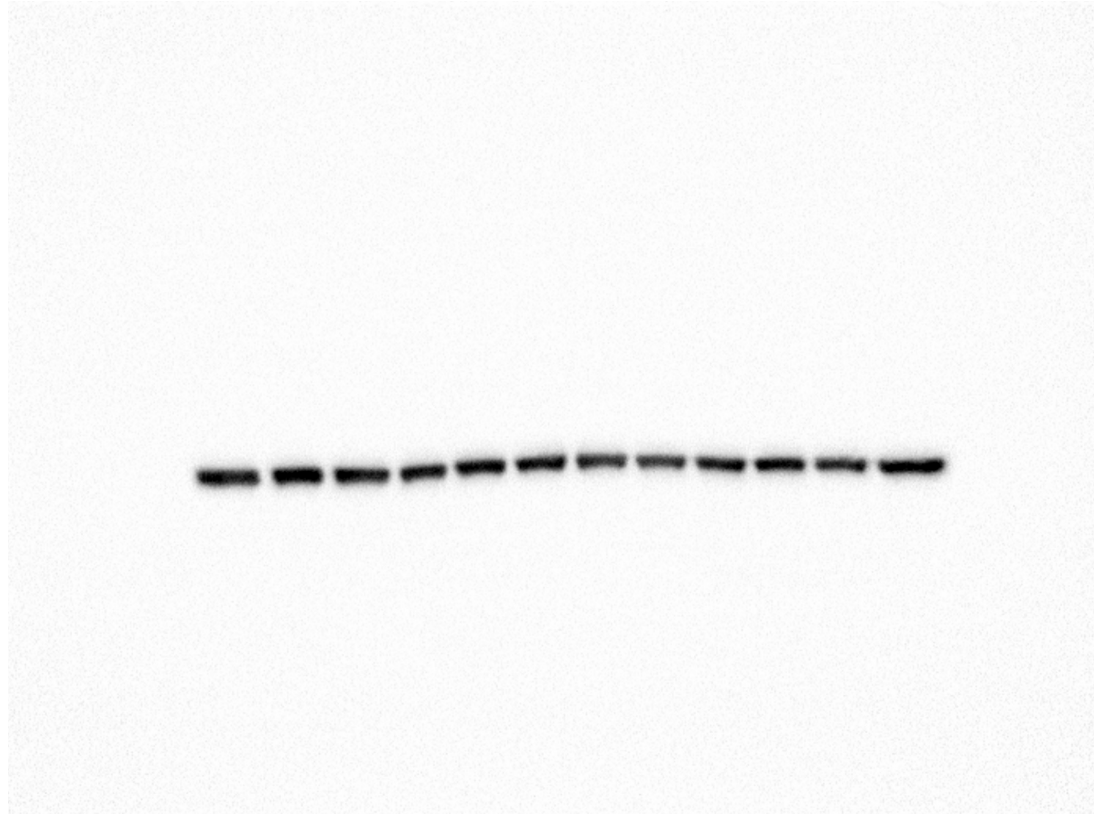

Supplement: pbio.3002144.s019.pdf [file pbio.3002144.s019.pdf]
